# Supplementary material
Source: publisher figshare collection journal article supplement (https://wiley.figshare.com/ndownloader/files/17599184)
Supplement: Supplementary file 1 [file 17599184]

PHOTO_FILE_NAME	PHOTO_TIMESTAMP	LATITUDE_WGS84	LONGITUDE_WGS84	ALTITUDE	SURVEY_TYPE	COUNT_ADULT	COUNT_PUP	KELP_PRESENT	LAND_PRESENT	IMAGE_QUALITY	COUNTED_BY	COUNTED_DATE	PROTOCOL_ID	QUALITY_FLAG
SO_C_20170728_A_0001.JPG	2017-07-28 14:42:18				Abundance	0	0	0	1	Good	LFT	2017-08-25	SO-2017.1	1
SO_C_20170728_A_0002.JPG	2017-07-28 14:42:19				Abundance	0	0	0	1	Good	LFT	2017-08-25	SO-2017.1	1
SO_C_20170728_A_0003.JPG	2017-07-28 14:42:20				Abundance	0	0	0	1	Good	LFT	2017-08-25	SO-2017.1	1
SO_C_20170728_A_0004.JPG	2017-07-28 14:42:21				Abundance	0	0	0	1	Good	LFT	2017-08-25	SO-2017.1	1
SO_C_20170728_A_0005.JPG	2017-07-28 14:42:22				Abundance	0	0	0	1	Good	LFT	2017-08-25	SO-2017.1	1
SO_C_20170728_A_0006.JPG	2017-07-28 14:42:23				Abundance	0	0	0	1	Good	LFT	2017-08-25	SO-2017.1	1
SO_C_20170728_A_0007.JPG	2017-07-28 14:42:24				Abundance	0	0	0	1	Good	LFT	2017-08-25	SO-2017.1	1
SO_C_20170728_A_0008.JPG	2017-07-28 14:42:25				Abundance	0	0	0	1	Good	LFT	2017-08-25	SO-2017.1	1
SO_C_20170728_A_0009.JPG	2017-07-28 14:42:26				Abundance	0	0	1	1	Good	LFT	2017-08-25	SO-2017.1	1
SO_C_20170728_A_0010.JPG	2017-07-28 14:42:27				Abundance	0	0	1	1	Good	LFT	2017-08-25	SO-2017.1	1
SO_C_20170728_A_0011.JPG	2017-07-28 14:42:28				Abundance	0	0	1	1	Good	LFT	2017-08-25	SO-2017.1	1
SO_C_20170728_A_0012.JPG	2017-07-28 14:42:33				Abundance	0	0	1	1	Good	LFT	2017-08-25	SO-2017.1	1
SO_C_20170728_A_0013.JPG	2017-07-28 14:42:34				Abundance	0	0	1	1	Good	LFT	2017-08-25	SO-2017.1	1
SO_C_20170728_A_0014.JPG	2017-07-28 14:42:35				Abundance	0	0	1	1	Good	LFT	2017-08-25	SO-2017.1	1
SO_C_20170728_A_0015.JPG	2017-07-28 14:42:36				Abundance	0	0	1	1	Good	LFT	2017-08-25	SO-2017.1	1
SO_C_20170728_A_0016.JPG	2017-07-28 14:48:46				Abundance	0	0	0	1	Good	LFT	2017-08-25	SO-2017.1	1
SO_C_20170728_A_0017.JPG	2017-07-28 14:48:47				Abundance	0	0	1	1	Good	LFT	2017-08-25	SO-2017.1	1
SO_C_20170728_A_0018.JPG	2017-07-28 14:48:48				Abundance	0	0	1	1	Good	LFT	2017-08-25	SO-2017.1	1
SO_C_20170728_A_0019.JPG	2017-07-28 14:48:49				Abundance	0	0	0	1	Good	LFT	2017-08-25	SO-2017.1	1
SO_C_20170728_A_0020.JPG	2017-07-28 14:48:50				Abundance	0	0	0	1	Good	LFT	2017-08-25	SO-2017.1	1
SO_C_20170728_A_0021.JPG	2017-07-28 14:48:51				Abundance	0	0	0	1	Good	LFT	2017-08-25	SO-2017.1	1
SO_C_20170728_A_0022.JPG	2017-07-28 14:48:52				Abundance	0	0	0	1	Good	LFT	2017-08-25	SO-2017.1	1
SO_C_20170728_A_0023.JPG	2017-07-28 14:48:53				Abundance	0	0	0	1	Good	LFT	2017-08-25	SO-2017.1	1
SO_C_20170728_A_0024.JPG	2017-07-28 14:48:54				Abundance	0	0	0	1	Good	LFT	2017-08-25	SO-2017.1	1
SO_C_20170728_A_0025.JPG	2017-07-28 14:48:55				Abundance	0	0	0	1	Good	LFT	2017-08-25	SO-2017.1	1
SO_C_20170728_A_0026.JPG	2017-07-28 14:48:56				Abundance	0	0	0	1	Good	LFT	2017-08-25	SO-2017.1	1
SO_C_20170728_A_0027.JPG	2017-07-28 14:48:57				Abundance	0	0	0	1	Good	LFT	2017-08-25	SO-2017.1	1
SO_C_20170728_A_0028.JPG	2017-07-28 14:48:58				Abundance	0	0	0	1	Good	LFT	2017-08-25	SO-2017.1	1
SO_C_20170728_A_0029.JPG	2017-07-28 14:48:59				Abundance	0	0	0	1	Good	LFT	2017-08-25	SO-2017.1	1
SO_C_20170728_A_0030.JPG	2017-07-28 14:49:00				Abundance	0	0	0	1	Good	LFT	2017-08-25	SO-2017.1	1
SO_C_20170728_A_0031.JPG	2017-07-28 14:49:01				Abundance	0	0	0	1	Good	LFT	2017-08-25	SO-2017.1	1
SO_C_20170728_A_0032.JPG	2017-07-28 14:49:02				Abundance	0	0	0	1	Good	LFT	2017-08-25	SO-2017.1	1
SO_C_20170728_A_0033.JPG	2017-07-28 14:49:03				Abundance	0	0	0	1	Good	LFT	2017-08-25	SO-2017.1	1
SO_C_20170728_A_0034.JPG	2017-07-28 14:49:04				Abundance	0	0	0	1	Good	LFT	2017-08-25	SO-2017.1	1
SO_C_20170728_A_0035.JPG	2017-07-28 14:49:05				Abundance	0	0	0	1	Good	LFT	2017-08-25	SO-2017.1	1
SO_C_20170728_A_0036.JPG	2017-07-28 14:49:06				Abundance	0	0	0	1	Good	LFT	2017-08-25	SO-2017.1	1
SO_C_20170728_A_0037.JPG	2017-07-28 14:49:07				Abundance	0	0	0	1	Good	LFT	2017-08-25	SO-2017.1	1
SO_C_20170728_A_0038.JPG	2017-07-28 14:49:08				Abundance	0	0	0	1	Good	LFT	2017-08-25	SO-2017.1	1
SO_C_20170728_A_0039.JPG	2017-07-28 14:49:09				Abundance	0	0	0	1	Good	LFT	2017-08-25	SO-2017.1	1
SO_C_20170728_A_0040.JPG	2017-07-28 14:49:10				Abundance	0	0	0	1	Good	LFT	2017-08-25	SO-2017.1	1
SO_C_20170728_A_0041.JPG	2017-07-28 14:49:11				Abundance	0	0	0	1	Good	LFT	2017-08-25	SO-2017.1	1
SO_C_20170728_A_0042.JPG	2017-07-28 14:49:12				Abundance	0	0	0	1	Good	LFT	2017-08-25	SO-2017.1	1
SO_C_20170728_A_0043.JPG	2017-07-28 14:49:13				Abundance	0	0	0	1	Good	LFT	2017-08-25	SO-2017.1	1
SO_C_20170728_A_0044.JPG	2017-07-28 14:49:14				Abundance	0	0	0	1	Good	LFT	2017-08-25	SO-2017.1	1
SO_C_20170728_A_0045.JPG	2017-07-28 14:49:15				Abundance	0	0	0	1	Good	LFT	2017-08-25	SO-2017.1	1
SO_C_20170728_A_0046.JPG	2017-07-28 14:49:16				Abundance	0	0	0	1	Good	LFT	2017-08-25	SO-2017.1	1
SO_C_20170728_A_0047.JPG	2017-07-28 14:49:17				Abundance	0	0	0	1	Good	LFT	2017-08-25	SO-2017.1	1
SO_C_20170728_A_0048.JPG	2017-07-28 14:49:18				Abundance	0	0	0	1	Good	LFT	2017-08-25	SO-2017.1	1
SO_C_20170728_A_0049.JPG	2017-07-28 14:49:19				Abundance	0	0	0	1	Good	LFT	2017-08-25	SO-2017.1	1
SO_C_20170728_A_0050.JPG	2017-07-28 14:49:20				Abundance	0	0	0	1	Good	LFT	2017-08-25	SO-2017.1	1
SO_C_20170728_A_0051.JPG	2017-07-28 14:49:21				Abundance	0	0	0	1	Good	LFT	2017-08-25	SO-2017.1	1
SO_C_20170728_A_0052.JPG	2017-07-28 14:49:22				Abundance	0	0	0	1	Good	LFT	2017-08-25	SO-2017.1	1
SO_C_20170728_A_0053.JPG	2017-07-28 14:49:23				Abundance	0	0	0	1	Good	LFT	2017-08-25	SO-2017.1	1
SO_C_20170728_A_0054.JPG	2017-07-28 14:49:24				Abundance	0	0	0	1	Good	LFT	2017-08-25	SO-2017.1	1
SO_C_20170728_A_0055.JPG	2017-07-28 14:49:25				Abundance	0	0	0	1	Good	LFT	2017-08-25	SO-2017.1	1
SO_C_20170728_A_0056.JPG	2017-07-28 14:49:26				Abundance	0	0	0	1	Good	LFT	2017-08-25	SO-2017.1	1
SO_C_20170728_A_0057.JPG	2017-07-28 14:49:27				Abundance	0	0	0	1	Good	LFT	2017-08-25	SO-2017.1	1
SO_C_20170728_A_0058.JPG	2017-07-28 14:49:28				Abundance	0	0	0	1	Good	LFT	2017-08-25	SO-2017.1	1
SO_C_20170728_A_0059.JPG	2017-07-28 14:49:29				Abundance	0	0	1	1	Good	LFT	2017-08-25	SO-2017.1	1
SO_C_20170728_A_0060.JPG	2017-07-28 14:49:30				Abundance	0	0	1	0	Good	LFT	2017-08-25	SO-2017.1	1
SO_C_20170728_A_0061.JPG	2017-07-28 14:49:31				Abundance	0	0	1	0	Good	LFT	2017-08-25	SO-2017.1	1
SO_C_20170728_A_0062.JPG	2017-07-28 14:49:32				Abundance	0	0	0	0	Good	LFT	2017-08-25	SO-2017.1	1
SO_C_20170728_A_0063.JPG	2017-07-28 14:49:33				Abundance	0	0	0	0	Good	LFT	2017-08-25	SO-2017.1	1
SO_C_20170728_A_0064.JPG	2017-07-28 14:49:34				Abundance	0	0	0	0	Good	LFT	2017-08-25	SO-2017.1	1
SO_C_20170728_A_0065.JPG	2017-07-28 14:49:35				Abundance	0	0	1	0	Good	LFT	2017-08-25	SO-2017.1	1
SO_C_20170728_A_0066.JPG	2017-07-28 14:49:36				Abundance	0	0	1	0	Good	LFT	2017-08-25	SO-2017.1	1
SO_C_20170728_A_0067.JPG	2017-07-28 14:49:37				Abundance	0	0	1	0	Good	LFT	2017-08-25	SO-2017.1	1
SO_C_20170728_A_0068.JPG	2017-07-28 14:49:38				Abundance	0	0	1	0	Good	LFT	2017-08-25	SO-2017.1	1
SO_C_20170728_A_0069.JPG	2017-07-28 14:49:39				Abundance	0	0	0	0	Good	LFT	2017-08-25	SO-2017.1	1
SO_C_20170728_A_0070.JPG	2017-07-28 14:49:40				Abundance	0	0	1	0	Good	LFT	2017-08-25	SO-2017.1	1
SO_C_20170728_A_0071.JPG	2017-07-28 14:49:41				Abundance	0	0	0	0	Good	LFT	2017-08-25	SO-2017.1	1
SO_C_20170728_A_0072.JPG	2017-07-28 14:49:42				Abundance	0	0	1	0	Good	LFT	2017-08-25	SO-2017.1	1
SO_C_20170728_A_0073.JPG	2017-07-28 14:49:43				Abundance	0	0	0	0	Good	LFT	2017-08-25	SO-2017.1	1
SO_C_20170728_A_0074.JPG	2017-07-28 14:49:44				Abundance	0	0	0	0	Good	LFT	2017-08-25	SO-2017.1	1
SO_C_20170728_A_0075.JPG	2017-07-28 14:49:45				Abundance	0	0	0	0	Good	LFT	2017-08-25	SO-2017.1	1
SO_C_20170728_A_0076.JPG	2017-07-28 14:49:46				Abundance	0	0	0	0	Good	LFT	2017-08-25	SO-2017.1	1
SO_C_20170728_A_0077.JPG	2017-07-28 14:49:47				Abundance	0	0	0	0	Good	LFT	2017-08-25	SO-2017.1	1
SO_C_20170728_A_0078.JPG	2017-07-28 14:49:48				Abundance	0	0	0	0	Good	LFT	2017-08-25	SO-2017.1	1
SO_C_20170728_A_0079.JPG	2017-07-28 14:49:49	58.46545556	-136.0084167	225	Abundance	0	0	0	0	Good	LFT	2017-08-25	SO-2017.1	0
SO_C_20170728_A_0080.JPG	2017-07-28 14:49:50	58.46546111	-136.0092417	225	Abundance	0	0	0	0	Good	LFT	2017-08-25	SO-2017.1	0
SO_C_20170728_A_0081.JPG	2017-07-28 14:49:51	58.46546389	-136.0100667	224	Abundance	0	0	0	0	Good	LFT	2017-08-25	SO-2017.1	0
SO_C_20170728_A_0082.JPG	2017-07-28 14:49:52	58.46546667	-136.0108917	224	Abundance	0	0	0	0	Good	LFT	2017-08-25	SO-2017.1	0
SO_C_20170728_A_0083.JPG	2017-07-28 14:49:53	58.46547222	-136.0117194	224	Abundance	0	0	0	0	Good	LFT	2017-08-25	SO-2017.1	0
SO_C_20170728_A_0084.JPG	2017-07-28 14:49:54	58.465475	-136.0125472	224	Abundance	0	0	0	0	Good	LFT	2017-08-25	SO-2017.1	0
SO_C_20170728_A_0085.JPG	2017-07-28 14:49:55	58.46547778	-136.0133778	223	Abundance	0	0	0	0	Good	LFT	2017-08-25	SO-2017.1	0
SO_C_20170728_A_0086.JPG	2017-07-28 14:49:56	58.46547778	-136.0142083	223	Abundance	0	0	0	0	Good	LFT	2017-08-25	SO-2017.1	0
SO_C_20170728_A_0087.JPG	2017-07-28 14:49:57	58.465475	-136.0150444	223	Abundance	0	0	0	0	Good	LFT	2017-08-25	SO-2017.1	0
SO_C_20170728_A_0088.JPG	2017-07-28 14:49:58	58.46546944	-136.0158806	222	Abundance	0	0	0	0	Good	LFT	2017-08-25	SO-2017.1	0
SO_C_20170728_A_0089.JPG	2017-07-28 14:49:59	58.46546111	-136.0167167	222	Abundance	0	0	0	0	Good	LFT	2017-08-25	SO-2017.1	0
SO_C_20170728_A_0090.JPG	2017-07-28 14:50:00	58.46544722	-136.0175556	222	Abundance	0	0	0	0	Good	LFT	2017-08-25	SO-2017.1	0
SO_C_20170728_A_0091.JPG	2017-07-28 14:50:01	58.46543056	-136.0183917	222	Abundance	0	0	0	0	Good	LFT	2017-08-25	SO-2017.1	0
SO_C_20170728_A_0092.JPG	2017-07-28 14:50:02	58.46541389	-136.0192278	221	Abundance	0	0	0	0	Good	LFT	2017-08-25	SO-2017.1	0
SO_C_20170728_A_0093.JPG	2017-07-28 14:50:03	58.46539167	-136.0200639	222	Abundance	0	0	0	0	Good	LFT	2017-08-25	SO-2017.1	0
SO_C_20170728_A_0094.JPG	2017-07-28 14:50:04	58.46537222	-136.0209	222	Abundance	0	0	0	0	Good	LFT	2017-08-25	SO-2017.1	0
SO_C_20170728_A_0095.JPG	2017-07-28 14:50:05	58.46535278	-136.0217333	223	Abundance	0	0	0	0	Good	LFT	2017-08-25	SO-2017.1	0
SO_C_20170728_A_0096.JPG	2017-07-28 14:50:06	58.46533611	-136.0225667	223	Abundance	0	0	0	0	Good	LFT	2017-08-25	SO-2017.1	0
SO_C_20170728_A_0097.JPG	2017-07-28 14:50:07	58.46531944	-136.0233972	224	Abundance	0	0	0	0	Good	LFT	2017-08-25	SO-2017.1	0
SO_C_20170728_A_0098.JPG	2017-07-28 14:50:08	58.46530556	-136.024225	224	Abundance	0	0	0	0	Good	LFT	2017-08-25	SO-2017.1	0
SO_C_20170728_A_0099.JPG	2017-07-28 14:50:09	58.46529167	-136.0250528	224	Abundance	0	0	0	0	Good	LFT	2017-08-25	SO-2017.1	0
SO_C_20170728_A_0100.JPG	2017-07-28 14:50:10	58.46528056	-136.0258778	224	Abundance	0	0	0	0	Good	LFT	2017-08-25	SO-2017.1	0
SO_C_20170728_A_0101.JPG	2017-07-28 14:50:11	58.46526667	-136.0267028	224	Abundance	0	0	1	0	Good	LFT	2017-08-25	SO-2017.1	0
SO_C_20170728_A_0102.JPG	2017-07-28 14:50:12	58.46525556	-136.0275306	223	Abundance	0	0	1	0	Good	LFT	2017-08-25	SO-2017.1	0
SO_C_20170728_A_0103.JPG	2017-07-28 14:50:13	58.46524722	-136.0283528	225	Abundance	0	0	1	0	Good	LFT	2017-08-25	SO-2017.1	0
SO_C_20170728_A_0104.JPG	2017-07-28 14:50:14	58.46523889	-136.0291778	225	Abundance	0	0	1	0	Good	LFT	2017-08-25	SO-2017.1	0
SO_C_20170728_A_0105.JPG	2017-07-28 14:50:15	58.46523611	-136.03	225	Abundance	0	0	1	0	Good	LFT	2017-08-25	SO-2017.1	0
SO_C_20170728_A_0106.JPG	2017-07-28 14:50:16	58.46523056	-136.030825	224	Abundance	0	0	1	0	Good	LFT	2017-08-25	SO-2017.1	0
SO_C_20170728_A_0107.JPG	2017-07-28 14:50:17	58.46522778	-136.03165	224	Abundance	0	0	0	0	Good	LFT	2017-08-25	SO-2017.1	0
SO_C_20170728_A_0108.JPG	2017-07-28 14:50:18	58.465225	-136.032475	224	Abundance	0	0	0	0	Good	LFT	2017-08-25	SO-2017.1	0
SO_C_20170728_A_0109.JPG	2017-07-28 14:50:19	58.46522222	-136.0333	223	Abundance	0	0	0	0	Good	LFT	2017-08-25	SO-2017.1	0
SO_C_20170728_A_0110.JPG	2017-07-28 14:50:20	58.46521667	-136.0341278	223	Abundance	0	0	0	0	Good	LFT	2017-08-25	SO-2017.1	0
SO_C_20170728_A_0111.JPG	2017-07-28 14:50:21	58.46520833	-136.0349583	223	Abundance	0	0	0	0	Good	LFT	2017-08-25	SO-2017.1	0
SO_C_20170728_A_0112.JPG	2017-07-28 14:50:22	58.46519722	-136.0357889	222	Abundance	0	0	0	0	Good	LFT	2017-08-25	SO-2017.1	0
SO_C_20170728_A_0114.JPG	2017-07-28 14:50:24	58.46517778	-136.0374472	222	Abundance	0	0	0	0	Good	LFT	2017-08-25	SO-2017.1	0
SO_C_20170728_A_0115.JPG	2017-07-28 14:50:25	58.46516667	-136.0382778	222	Abundance	0	0	0	0	Good	LFT	2017-08-25	SO-2017.1	0
SO_C_20170728_A_0116.JPG	2017-07-28 14:50:26	58.46515833	-136.0391056	222	Abundance	0	0	1	0	Good	LFT	2017-08-25	SO-2017.1	0
SO_C_20170728_A_0117.JPG	2017-07-28 14:50:27	58.46515278	-136.0399361	222	Abundance	0	0	0	0	Good	LFT	2017-08-25	SO-2017.1	0
SO_C_20170728_A_0118.JPG	2017-07-28 14:50:28	58.46514722	-136.0407639	221	Abundance	0	0	0	0	Good	LFT	2017-08-25	SO-2017.1	0
SO_C_20170728_A_0119.JPG	2017-07-28 14:50:29	58.46514444	-136.0415917	222	Abundance	0	0	1	0	Good	LFT	2017-08-25	SO-2017.1	0
SO_C_20170728_A_0120.JPG	2017-07-28 14:50:30	58.46514167	-136.0424194	222	Abundance	0	0	1	0	Good	LFT	2017-08-25	SO-2017.1	0
SO_C_20170728_A_0121.JPG	2017-07-28 14:50:31	58.46513889	-136.0432472	222	Abundance	0	0	1	0	Good	LFT	2017-08-25	SO-2017.1	0
SO_C_20170728_A_0122.JPG	2017-07-28 14:50:32	58.46513333	-136.0440778	222	Abundance	0	0	0	0	Good	LFT	2017-08-25	SO-2017.1	0
SO_C_20170728_A_0123.JPG	2017-07-28 14:50:33	58.46512778	-136.0449083	221	Abundance	0	0	0	0	Good	LFT	2017-08-25	SO-2017.1	0
SO_C_20170728_A_0124.JPG	2017-07-28 14:50:34	58.46512222	-136.0457389	221	Abundance	0	0	0	0	Good	LFT	2017-08-25	SO-2017.1	0
SO_C_20170728_A_0125.JPG	2017-07-28 14:50:35	58.46511667	-136.0465722	221	Abundance	0	0	0	0	Good	LFT	2017-08-25	SO-2017.1	0
SO_C_20170728_A_0126.JPG	2017-07-28 14:50:36	58.46511389	-136.0474028	221	Abundance	0	0	0	0	Good	LFT	2017-08-25	SO-2017.1	0
SO_C_20170728_A_0127.JPG	2017-07-28 14:50:37	58.46511111	-136.0482333	221	Abundance	0	0	1	0	Good	LFT	2017-08-25	SO-2017.1	0
SO_C_20170728_A_0128.JPG	2017-07-28 14:50:38	58.46511111	-136.0490667	221	Abundance	0	0	1	0	Good	LFT	2017-08-25	SO-2017.1	0
SO_C_20170728_A_0129.JPG	2017-07-28 14:50:39	58.46510833	-136.0498972	220	Abundance	0	0	0	0	Good	LFT	2017-08-25	SO-2017.1	0
SO_C_20170728_A_0130.JPG	2017-07-28 14:50:40	58.46510833	-136.0507306	220	Abundance	0	0	0	0	Good	LFT	2017-08-25	SO-2017.1	0
SO_C_20170728_A_0131.JPG	2017-07-28 14:50:41	58.46510556	-136.0515639	220	Abundance	0	0	0	0	Good	LFT	2017-08-25	SO-2017.1	0
SO_C_20170728_A_0132.JPG	2017-07-28 14:50:42	58.46510833	-136.0524	220	Abundance	0	0	0	0	Good	LFT	2017-08-25	SO-2017.1	0
SO_C_20170728_A_0133.JPG	2017-07-28 14:50:43	58.46510833	-136.0532333	220	Abundance	0	0	0	0	Good	LFT	2017-08-25	SO-2017.1	0
SO_C_20170728_A_0134.JPG	2017-07-28 14:50:44	58.46510833	-136.0540667	220	Abundance	0	0	0	0	Good	LFT	2017-08-25	SO-2017.1	0
SO_C_20170728_A_0135.JPG	2017-07-28 14:50:45	58.46510833	-136.0549028	220	Abundance	0	0	0	0	Good	LFT	2017-08-25	SO-2017.1	0
SO_C_20170728_A_0136.JPG	2017-07-28 14:50:46	58.46510833	-136.0557389	219	Abundance	0	0	0	0	Good	LFT	2017-08-25	SO-2017.1	0
SO_C_20170728_A_0137.JPG	2017-07-28 14:50:47	58.46510556	-136.0565722	219	Abundance	0	0	0	0	Good	LFT	2017-08-25	SO-2017.1	0
SO_C_20170728_A_0138.JPG	2017-07-28 14:50:48	58.46510556	-136.0574083	218	Abundance	0	0	0	0	Good	LFT	2017-08-25	SO-2017.1	0
SO_C_20170728_A_0139.JPG	2017-07-28 14:50:49	58.46510278	-136.0582444	219	Abundance	0	0	0	0	Good	LFT	2017-08-25	SO-2017.1	0
SO_C_20170728_A_0140.JPG	2017-07-28 14:50:50	58.46510278	-136.0590806	218	Abundance	0	0	0	0	Good	LFT	2017-08-25	SO-2017.1	0
SO_C_20170728_A_0141.JPG	2017-07-28 14:50:51	58.4651	-136.0599139	218	Abundance	0	0	0	0	Good	LFT	2017-08-25	SO-2017.1	0
SO_C_20170728_A_0142.JPG	2017-07-28 14:50:52	58.46509722	-136.06075	218	Abundance	0	0	0	0	Good	LFT	2017-08-25	SO-2017.1	0
SO_C_20170728_A_0143.JPG	2017-07-28 14:50:53	58.46509167	-136.0615833	218	Abundance	0	0	0	0	Good	LFT	2017-08-25	SO-2017.1	0
SO_C_20170728_A_0144.JPG	2017-07-28 14:50:54	58.46508889	-136.0624167	218	Abundance	0	0	0	0	Good	LFT	2017-08-25	SO-2017.1	0
SO_C_20170728_A_0145.JPG	2017-07-28 14:50:55	58.46508333	-136.0632472	219	Abundance	0	0	1	0	Good	LFT	2017-08-25	SO-2017.1	0
SO_C_20170728_A_0146.JPG	2017-07-28 14:50:56	58.46508056	-136.0640778	219	Abundance	0	0	1	0	Good	LFT	2017-08-25	SO-2017.1	0
SO_C_20170728_A_0147.JPG	2017-07-28 14:50:57	58.46507778	-136.0649028	220	Abundance	0	0	1	0	Good	LFT	2017-08-25	SO-2017.1	0
SO_C_20170728_A_0148.JPG	2017-07-28 14:50:58	58.46507778	-136.0657278	220	Abundance	0	0	0	0	Good	LFT	2017-08-25	SO-2017.1	0
SO_C_20170728_A_0149.JPG	2017-07-28 14:50:59	58.465075	-136.0665528	220	Abundance	0	0	1	0	Good	LFT	2017-08-25	SO-2017.1	0
SO_C_20170728_A_0150.JPG	2017-07-28 14:51:00	58.465075	-136.0673722	221	Abundance	0	0	1	0	Good	LFT	2017-08-25	SO-2017.1	0
SO_C_20170728_A_0151.JPG	2017-07-28 14:51:01	58.46506944	-136.0681917	222	Abundance	0	0	1	0	Good	LFT	2017-08-25	SO-2017.1	0
SO_C_20170728_A_0152.JPG	2017-07-28 14:51:02	58.46506667	-136.0690056	222	Abundance	0	0	1	0	Good	LFT	2017-08-25	SO-2017.1	0
SO_C_20170728_A_0153.JPG	2017-07-28 14:51:03	58.46505833	-136.0698194	224	Abundance	0	0	1	0	Good	LFT	2017-08-25	SO-2017.1	0
SO_C_20170728_A_0154.JPG	2017-07-28 14:51:04	58.46505	-136.0706333	223	Abundance	0	0	1	0	Good	LFT	2017-08-25	SO-2017.1	0
SO_C_20170728_A_0155.JPG	2017-07-28 14:51:05	58.46503889	-136.0714444	223	Abundance	0	0	1	0	Good	LFT	2017-08-25	SO-2017.1	0
SO_C_20170728_A_0156.JPG	2017-07-28 14:51:06	58.46502778	-136.0722556	224	Abundance	0	0	1	1	Good	LFT	2017-08-25	SO-2017.1	0
SO_C_20170728_A_0157.JPG	2017-07-28 14:51:07	58.46501389	-136.0730667	224	Abundance	0	0	0	1	Good	LFT	2017-08-25	SO-2017.1	0
SO_C_20170728_A_0158.JPG	2017-07-28 14:51:08	58.465	-136.0738778	224	Abundance	0	0	0	1	Good	LFT	2017-08-25	SO-2017.1	0
SO_C_20170728_A_0159.JPG	2017-07-28 14:51:09	58.46498611	-136.0746861	225	Abundance	0	0	0	1	Good	LFT	2017-08-25	SO-2017.1	0
SO_C_20170728_A_0160.JPG	2017-07-28 14:51:10	58.46496944	-136.0754972	225	Abundance	0	0	0	1	Good	LFT	2017-08-25	SO-2017.1	0
SO_C_20170728_A_0161.JPG	2017-07-28 14:51:11	58.46495	-136.0763083	224	Abundance	0	0	0	1	Good	LFT	2017-08-25	SO-2017.1	0
SO_C_20170728_A_0162.JPG	2017-07-28 14:52:36	58.46911111	-136.0942167	223	Abundance	0	0	0	1	Good	LFT	2017-08-25	SO-2017.1	0
SO_C_20170728_A_0163.JPG	2017-07-28 14:52:37	58.468925	-136.0934972	223	Abundance	0	0	0	1	Good	LFT	2017-08-25	SO-2017.1	0
SO_C_20170728_A_0164.JPG	2017-07-28 14:52:38	58.46873889	-136.0927778	223	Abundance	0	0	0	1	Good	LFT	2017-08-25	SO-2017.1	0
SO_C_20170728_A_0165.JPG	2017-07-28 14:52:39	58.46855833	-136.0920528	224	Abundance	0	0	0	1	Good	LFT	2017-08-25	SO-2017.1	0
SO_C_20170728_A_0166.JPG	2017-07-28 14:52:40	58.46838611	-136.0913167	224	Abundance	0	0	0	1	Good	LFT	2017-08-25	SO-2017.1	0
SO_C_20170728_A_0167.JPG	2017-07-28 14:52:41	58.46822778	-136.0905694	224	Abundance	0	0	0	1	Good	LFT	2017-08-25	SO-2017.1	0
SO_C_20170728_A_0168.JPG	2017-07-28 14:52:42	58.46809167	-136.0898028	224	Abundance	0	0	0	1	Good	LFT	2017-08-25	SO-2017.1	0
SO_C_20170728_A_0169.JPG	2017-07-28 14:52:43	58.46798056	-136.0890222	224	Abundance	0	0	0	1	Good	LFT	2017-08-25	SO-2017.1	0
SO_C_20170728_A_0170.JPG	2017-07-28 14:52:44	58.46789167	-136.0882278	224	Abundance	0	0	0	1	Good	LFT	2017-08-25	SO-2017.1	0
SO_C_20170728_A_0171.JPG	2017-07-28 14:52:45	58.46783056	-136.0874222	224	Abundance	0	0	0	1	Good	LFT	2017-08-25	SO-2017.1	0
SO_C_20170728_A_0172.JPG	2017-07-28 14:52:46	58.46779167	-136.0866083	223	Abundance	0	0	0	1	Good	LFT	2017-08-25	SO-2017.1	0
SO_C_20170728_A_0173.JPG	2017-07-28 14:52:47	58.46777222	-136.0857861	223	Abundance	0	0	0	1	Good	LFT	2017-08-25	SO-2017.1	0
SO_C_20170728_A_0174.JPG	2017-07-28 14:52:48	58.46776667	-136.0849611	221	Abundance	0	0	0	1	Good	LFT	2017-08-25	SO-2017.1	0
SO_C_20170728_A_0175.JPG	2017-07-28 14:52:49	58.46777778	-136.0841306	222	Abundance	0	0	0	1	Good	LFT	2017-08-25	SO-2017.1	0
SO_C_20170728_A_0176.JPG	2017-07-28 14:52:50	58.46779444	-136.0832972	221	Abundance	0	0	0	1	Good	LFT	2017-08-25	SO-2017.1	0
SO_C_20170728_A_0177.JPG	2017-07-28 14:52:51	58.46781944	-136.0824583	219	Abundance	0	0	0	1	Good	LFT	2017-08-25	SO-2017.1	0
SO_C_20170728_A_0178.JPG	2017-07-28 14:52:52	58.46785278	-136.0816167	219	Abundance	0	0	0	1	Good	LFT	2017-08-25	SO-2017.1	0
SO_C_20170728_A_0179.JPG	2017-07-28 14:52:53	58.46789444	-136.080775	218	Abundance	0	0	0	1	Good	LFT	2017-08-25	SO-2017.1	0
SO_C_20170728_A_0180.JPG	2017-07-28 14:52:54	58.46794167	-136.0799306	217	Abundance	0	0	0	1	Good	LFT	2017-08-25	SO-2017.1	0
SO_C_20170728_A_0181.JPG	2017-07-28 14:52:55	58.468	-136.0790861	217	Abundance	0	0	0	1	Good	LFT	2017-08-25	SO-2017.1	0
SO_C_20170728_A_0182.JPG	2017-07-28 14:52:56	58.46806111	-136.0782444	217	Abundance	0	0	0	1	Good	LFT	2017-08-25	SO-2017.1	0
SO_C_20170728_A_0183.JPG	2017-07-28 14:52:57	58.468125	-136.0774028	217	Abundance	0	0	0	1	Good	LFT	2017-08-25	SO-2017.1	0
SO_C_20170728_A_0184.JPG	2017-07-28 14:52:58	58.46818889	-136.0765639	217	Abundance	0	0	0	1	Good	LFT	2017-08-25	SO-2017.1	0
SO_C_20170728_A_0185.JPG	2017-07-28 14:52:59	58.46825	-136.075725	218	Abundance	0	0	0	1	Good	LFT	2017-08-25	SO-2017.1	0
SO_C_20170728_A_0186.JPG	2017-07-28 14:53:00	58.46830556	-136.0748833	218	Abundance	0	0	0	1	Good	LFT	2017-08-25	SO-2017.1	0
SO_C_20170728_A_0187.JPG	2017-07-28 14:53:01	58.46836111	-136.0740444	219	Abundance	0	0	0	1	Good	LFT	2017-08-25	SO-2017.1	0
SO_C_20170728_A_0188.JPG	2017-07-28 14:53:02	58.46841389	-136.0732028	220	Abundance	0	0	1	1	Good	LFT	2017-08-25	SO-2017.1	0
SO_C_20170728_A_0189.JPG	2017-07-28 14:53:03	58.46846389	-136.0723611	220	Abundance	0	0	1	0	Good	LFT	2017-08-25	SO-2017.1	0
SO_C_20170728_A_0190.JPG	2017-07-28 14:53:04	58.46850833	-136.0715167	220	Abundance	0	0	1	0	Good	LFT	2017-08-25	SO-2017.1	0
SO_C_20170728_A_0193.JPG	2017-07-28 14:53:07	58.46860833	-136.0689833	221	Abundance	0	0	1	0	Good	LFT	2017-08-25	SO-2017.1	0
SO_C_20170728_A_0194.JPG	2017-07-28 14:53:08	58.46862778	-136.0681389	222	Abundance	0	0	1	0	Good	LFT	2017-08-25	SO-2017.1	0
SO_C_20170728_A_0195.JPG	2017-07-28 14:53:09	58.46864167	-136.0672944	223	Abundance	0	0	1	0	Good	LFT	2017-08-25	SO-2017.1	0
SO_C_20170728_A_0196.JPG	2017-07-28 14:53:10	58.46865278	-136.0664528	223	Abundance	0	0	1	0	Good	LFT	2017-08-25	SO-2017.1	0
SO_C_20170728_A_0197.JPG	2017-07-28 14:53:11	58.46866111	-136.0656111	223	Abundance	0	0	0	0	Good	LFT	2017-08-25	SO-2017.1	0
SO_C_20170728_A_0198.JPG	2017-07-28 14:53:12	58.46866667	-136.0647667	224	Abundance	0	0	0	0	Good	LFT	2017-08-25	SO-2017.1	0
SO_C_20170728_A_0199.JPG	2017-07-28 14:53:13	58.46866667	-136.063925	224	Abundance	0	0	0	0	Good	LFT	2017-08-25	SO-2017.1	0
SO_C_20170728_A_0200.JPG	2017-07-28 14:53:14	58.46866667	-136.0630833	224	Abundance	0	0	0	0	Good	LFT	2017-08-25	SO-2017.1	0
SO_C_20170728_A_0201.JPG	2017-07-28 14:53:15	58.46866111	-136.0622389	224	Abundance	0	0	0	0	Good	LFT	2017-08-28	SO-2017.1	0
SO_C_20170728_A_0202.JPG	2017-07-28 14:53:16	58.46865	-136.0613972	224	Abundance	0	0	0	0	Good	LFT	2017-08-28	SO-2017.1	0
SO_C_20170728_A_0203.JPG	2017-07-28 14:53:17	58.46863611	-136.0605528	224	Abundance	0	0	0	0	Good	LFT	2017-08-28	SO-2017.1	0
SO_C_20170728_A_0204.JPG	2017-07-28 14:53:18	58.46861944	-136.0597083	224	Abundance	0	0	0	0	Good	LFT	2017-08-28	SO-2017.1	0
SO_C_20170728_A_0205.JPG	2017-07-28 14:53:19	58.4686	-136.0588639	224	Abundance	0	0	0	0	Good	LFT	2017-08-28	SO-2017.1	0
SO_C_20170728_A_0206.JPG	2017-07-28 14:53:20	58.46858056	-136.0580194	224	Abundance	0	0	0	0	Good	LFT	2017-08-28	SO-2017.1	0
SO_C_20170728_A_0207.JPG	2017-07-28 14:53:21	58.46856111	-136.057175	224	Abundance	0	0	0	0	Good	LFT	2017-08-28	SO-2017.1	0
SO_C_20170728_A_0208.JPG	2017-07-28 14:53:22	58.46854167	-136.0563333	225	Abundance	0	0	0	0	Good	LFT	2017-08-28	SO-2017.1	0
SO_C_20170728_A_0209.JPG	2017-07-28 14:53:23	58.468525	-136.0554889	225	Abundance	0	0	0	0	Good	LFT	2017-08-28	SO-2017.1	0
SO_C_20170728_A_0210.JPG	2017-07-28 14:53:24	58.46850833	-136.0546472	225	Abundance	0	0	0	0	Good	LFT	2017-08-28	SO-2017.1	0
SO_C_20170728_A_0211.JPG	2017-07-28 14:53:25	58.46849722	-136.0538083	226	Abundance	0	0	0	0	Good	LFT	2017-08-28	SO-2017.1	0
SO_C_20170728_A_0212.JPG	2017-07-28 14:53:26	58.46848611	-136.0529694	227	Abundance	0	0	0	0	Good	LFT	2017-08-28	SO-2017.1	0
SO_C_20170728_A_0213.JPG	2017-07-28 14:53:27	58.468475	-136.0521333	227	Abundance	0	0	0	0	Good	LFT	2017-08-28	SO-2017.1	0
SO_C_20170728_A_0214.JPG	2017-07-28 14:53:28	58.46846944	-136.0512972	227	Abundance	0	0	1	0	Good	LFT	2017-08-28	SO-2017.1	0
SO_C_20170728_A_0215.JPG	2017-07-28 14:53:29	58.46846667	-136.0504639	227	Abundance	0	0	1	0	Good	LFT	2017-08-28	SO-2017.1	0
SO_C_20170728_A_0216.JPG	2017-07-28 14:53:30	58.46846944	-136.0496306	227	Abundance	0	0	0	0	Good	LFT	2017-08-28	SO-2017.1	0
SO_C_20170728_A_0217.JPG	2017-07-28 14:53:31	58.468475	-136.0488	227	Abundance	0	0	0	0	Good	LFT	2017-08-28	SO-2017.1	0
SO_C_20170728_A_0218.JPG	2017-07-28 14:53:32	58.46848611	-136.0479667	227	Abundance	0	0	0	0	Good	LFT	2017-08-28	SO-2017.1	0
SO_C_20170728_A_0219.JPG	2017-07-28 14:53:33	58.4685	-136.0471361	227	Abundance	0	0	1	0	Good	LFT	2017-08-28	SO-2017.1	0
SO_C_20170728_A_0220.JPG	2017-07-28 14:53:34	58.46851389	-136.0463028	226	Abundance	0	0	1	0	Good	LFT	2017-08-28	SO-2017.1	0
SO_C_20170728_A_0221.JPG	2017-07-28 14:53:35	58.46852778	-136.0454667	226	Abundance	0	0	0	0	Good	LFT	2017-08-28	SO-2017.1	0
SO_C_20170728_A_0222.JPG	2017-07-28 14:53:36	58.46854444	-136.0446306	225	Abundance	0	0	0	0	Good	LFT	2017-08-28	SO-2017.1	0
SO_C_20170728_A_0223.JPG	2017-07-28 14:53:37	58.46856111	-136.0437917	224	Abundance	0	0	1	0	Good	LFT	2017-08-28	SO-2017.1	0
SO_C_20170728_A_0224.JPG	2017-07-28 14:53:38	58.46857778	-136.0429528	224	Abundance	0	0	1	0	Good	LFT	2017-08-28	SO-2017.1	0
SO_C_20170728_A_0225.JPG	2017-07-28 14:53:39	58.46859722	-136.0421139	224	Abundance	0	0	0	0	Good	LFT	2017-08-28	SO-2017.1	0
SO_C_20170728_A_0226.JPG	2017-07-28 14:53:40	58.46861111	-136.0412722	223	Abundance	0	0	0	0	Good	LFT	2017-08-28	SO-2017.1	0
SO_C_20170728_A_0227.JPG	2017-07-28 14:53:41	58.46862778	-136.0404333	223	Abundance	0	0	0	0	Good	LFT	2017-08-28	SO-2017.1	0
SO_C_20170728_A_0228.JPG	2017-07-28 14:53:42	58.46864167	-136.0395944	223	Abundance	0	0	1	0	Good	LFT	2017-08-28	SO-2017.1	0
SO_C_20170728_A_0229.JPG	2017-07-28 14:53:43	58.46865556	-136.0387556	223	Abundance	0	0	0	0	Good	LFT	2017-08-28	SO-2017.1	0
SO_C_20170728_A_0230.JPG	2017-07-28 14:53:44	58.46866944	-136.0379167	223	Abundance	0	0	0	0	Good	LFT	2017-08-28	SO-2017.1	0
SO_C_20170728_A_0231.JPG	2017-07-28 14:53:45	58.46868889	-136.0370806	223	Abundance	0	0	0	0	Good	LFT	2017-08-28	SO-2017.1	0
SO_C_20170728_A_0232.JPG	2017-07-28 14:53:46	58.46870556	-136.0362444	223	Abundance	0	0	0	0	Good	LFT	2017-08-28	SO-2017.1	0
SO_C_20170728_A_0233.JPG	2017-07-28 14:53:47	58.46871944	-136.0354111	223	Abundance	0	0	1	0	Good	LFT	2017-08-28	SO-2017.1	0
SO_C_20170728_A_0234.JPG	2017-07-28 14:53:48	58.46873333	-136.0345778	223	Abundance	0	0	1	0	Good	LFT	2017-08-28	SO-2017.1	0
SO_C_20170728_A_0235.JPG	2017-07-28 14:53:49	58.46874722	-136.03375	224	Abundance	0	0	1	0	Good	LFT	2017-08-28	SO-2017.1	0
SO_C_20170728_A_0236.JPG	2017-07-28 14:53:50	58.46876111	-136.0329222	224	Abundance	0	0	1	0	Good	LFT	2017-08-28	SO-2017.1	0
SO_C_20170728_A_0237.JPG	2017-07-28 14:53:51	58.468775	-136.0320972	225	Abundance	0	0	1	0	Good	LFT	2017-08-28	SO-2017.1	0
SO_C_20170728_A_0238.JPG	2017-07-28 14:53:52	58.46878889	-136.0312722	225	Abundance	0	0	1	0	Good	LFT	2017-08-28	SO-2017.1	0
SO_C_20170728_A_0239.JPG	2017-07-28 14:53:53	58.46880278	-136.0304528	226	Abundance	0	0	0	0	Good	LFT	2017-08-28	SO-2017.1	0
SO_C_20170728_A_0240.JPG	2017-07-28 14:53:54	58.46882222	-136.0296361	226	Abundance	0	0	0	0	Good	LFT	2017-08-28	SO-2017.1	0
SO_C_20170728_A_0241.JPG	2017-07-28 14:53:55	58.46884167	-136.0288194	226	Abundance	0	0	0	0	Good	LFT	2017-08-28	SO-2017.1	0
SO_C_20170728_A_0242.JPG	2017-07-28 14:53:56	58.46886111	-136.0280056	226	Abundance	0	0	0	0	Good	LFT	2017-08-28	SO-2017.1	0
SO_C_20170728_A_0243.JPG	2017-07-28 14:53:57	58.46888333	-136.0271944	226	Abundance	0	0	0	0	Good	LFT	2017-08-28	SO-2017.1	0
SO_C_20170728_A_0244.JPG	2017-07-28 14:53:58	58.46890833	-136.0263833	227	Abundance	0	0	0	0	Good	LFT	2017-08-28	SO-2017.1	0
SO_C_20170728_A_0245.JPG	2017-07-28 14:53:59	58.46893333	-136.025575	226	Abundance	0	0	0	0	Good	LFT	2017-08-28	SO-2017.1	0
SO_C_20170728_A_0246.JPG	2017-07-28 14:54:00	58.46896111	-136.0247667	227	Abundance	0	0	0	0	Good	LFT	2017-08-28	SO-2017.1	0
SO_C_20170728_A_0247.JPG	2017-07-28 14:54:01	58.46898611	-136.0239583	227	Abundance	0	0	0	0	Good	LFT	2017-08-28	SO-2017.1	0
SO_C_20170728_A_0248.JPG	2017-07-28 14:54:02	58.46900833	-136.02315	227	Abundance	0	0	0	0	Good	LFT	2017-08-28	SO-2017.1	0
SO_C_20170728_A_0249.JPG	2017-07-28 14:54:03	58.46902778	-136.0223417	227	Abundance	0	0	0	0	Good	LFT	2017-08-28	SO-2017.1	0
SO_C_20170728_A_0250.JPG	2017-07-28 14:54:04	58.46904444	-136.0215333	227	Abundance	0	0	0	0	Good	LFT	2017-08-28	SO-2017.1	0
SO_C_20170728_A_0251.JPG	2017-07-28 14:54:05	58.46906111	-136.020725	227	Abundance	0	0	0	0	Good	LFT	2017-08-28	SO-2017.1	0
SO_C_20170728_A_0252.JPG	2017-07-28 14:54:06	58.46907778	-136.0199167	227	Abundance	0	0	0	0	Good	LFT	2017-08-28	SO-2017.1	0
SO_C_20170728_A_0253.JPG	2017-07-28 14:54:07	58.46908889	-136.0191056	227	Abundance	0	0	0	0	Good	LFT	2017-08-28	SO-2017.1	0
SO_C_20170728_A_0254.JPG	2017-07-28 14:54:08	58.4691	-136.0182944	227	Abundance	0	0	0	0	Good	LFT	2017-08-28	SO-2017.1	0
SO_C_20170728_A_0255.JPG	2017-07-28 14:54:09	58.46910833	-136.0174833	227	Abundance	0	0	0	0	Good	LFT	2017-08-28	SO-2017.1	0
SO_C_20170728_A_0256.JPG	2017-07-28 14:54:10	58.46911111	-136.0166694	227	Abundance	0	0	0	0	Good	LFT	2017-08-28	SO-2017.1	0
SO_C_20170728_A_0257.JPG	2017-07-28 14:54:11	58.46911389	-136.0158556	227	Abundance	0	0	0	0	Good	LFT	2017-08-28	SO-2017.1	0
SO_C_20170728_A_0258.JPG	2017-07-28 14:54:12	58.46911111	-136.0150389	227	Abundance	0	0	0	0	Good	LFT	2017-08-28	SO-2017.1	0
SO_C_20170728_A_0259.JPG	2017-07-28 14:54:13	58.46910833	-136.0142194	227	Abundance	0	0	0	0	Good	LFT	2017-08-28	SO-2017.1	0
SO_C_20170728_A_0260.JPG	2017-07-28 14:54:14	58.46910278	-136.0133972	227	Abundance	0	0	0	0	Good	LFT	2017-08-28	SO-2017.1	0
SO_C_20170728_A_0261.JPG	2017-07-28 14:54:15	58.46909722	-136.0125778	227	Abundance	0	0	0	0	Good	LFT	2017-08-28	SO-2017.1	0
SO_C_20170728_A_0262.JPG	2017-07-28 14:54:16	58.46908889	-136.0117556	227	Abundance	0	0	0	0	Good	LFT	2017-08-28	SO-2017.1	0
SO_C_20170728_A_0263.JPG	2017-07-28 14:54:17	58.46908333	-136.0109306	226	Abundance	0	0	0	0	Good	LFT	2017-08-28	SO-2017.1	0
SO_C_20170728_A_0264.JPG	2017-07-28 14:54:18	58.46907222	-136.0101056	226	Abundance	0	0	0	0	Good	LFT	2017-08-28	SO-2017.1	0
SO_C_20170728_A_0265.JPG	2017-07-28 14:54:19	58.46906111	-136.009275	225	Abundance	0	0	1	0	Good	LFT	2017-08-28	SO-2017.1	0
SO_C_20170728_A_0266.JPG	2017-07-28 14:54:20	58.46905	-136.0084417	225	Abundance	0	0	1	0	Good	LFT	2017-08-28	SO-2017.1	0
SO_C_20170728_A_0267.JPG	2017-07-28 14:54:21	58.46903889	-136.0076083	225	Abundance	0	0	1	0	Good	LFT	2017-08-28	SO-2017.1	0
SO_C_20170728_A_0268.JPG	2017-07-28 14:54:22	58.46902778	-136.0067722	225	Abundance	0	0	1	0	Good	LFT	2017-08-28	SO-2017.1	0
SO_C_20170728_A_0269.JPG	2017-07-28 14:54:23	58.46901944	-136.0059361	224	Abundance	0	0	1	0	Good	LFT	2017-08-28	SO-2017.1	0
SO_C_20170728_A_0270.JPG	2017-07-28 14:54:24	58.46901111	-136.0051	224	Abundance	0	0	0	0	Good	LFT	2017-08-28	SO-2017.1	0
SO_C_20170728_A_0271.JPG	2017-07-28 14:54:25	58.469	-136.0042639	224	Abundance	0	0	1	0	Good	LFT	2017-08-28	SO-2017.1	0
SO_C_20170728_A_0272.JPG	2017-07-28 14:54:26	58.46899167	-136.0034278	224	Abundance	0	0	1	0	Good	LFT	2017-08-28	SO-2017.1	0
SO_C_20170728_A_0273.JPG	2017-07-28 14:54:27	58.46898889	-136.0025944	225	Abundance	0	0	1	0	Good	LFT	2017-08-28	SO-2017.1	0
SO_C_20170728_A_0274.JPG	2017-07-28 14:54:28	58.46898611	-136.0017611	225	Abundance	0	0	1	0	Good	LFT	2017-08-28	SO-2017.1	0
SO_C_20170728_A_0275.JPG	2017-07-28 14:54:29	58.46898611	-136.0009333	225	Abundance	0	0	1	0	Good	LFT	2017-08-28	SO-2017.1	0
SO_C_20170728_A_0276.JPG	2017-07-28 14:54:30	58.46898889	-136.0001083	225	Abundance	0	0	1	0	Good	LFT	2017-08-28	SO-2017.1	0
SO_C_20170728_A_0277.JPG	2017-07-28 14:54:31	58.46899167	-135.9992861	226	Abundance	0	0	1	0	Good	LFT	2017-08-28	SO-2017.1	0
SO_C_20170728_A_0278.JPG	2017-07-28 14:54:32	58.46899444	-135.9984639	226	Abundance	0	0	1	1	Good	LFT	2017-08-28	SO-2017.1	0
SO_C_20170728_A_0279.JPG	2017-07-28 14:54:33	58.469	-135.9976472	228	Abundance	0	0	0	1	Good	LFT	2017-08-28	SO-2017.1	0
SO_C_20170728_A_0280.JPG	2017-07-28 14:54:34	58.46900833	-135.9968333	227	Abundance	0	0	0	1	Good	LFT	2017-08-28	SO-2017.1	0
SO_C_20170728_A_0281.JPG	2017-07-28 14:54:35	58.46901667	-135.9960194	227	Abundance	0	0	0	1	Good	LFT	2017-08-28	SO-2017.1	0
SO_C_20170728_A_0282.JPG	2017-07-28 14:54:36	58.46902778	-135.9952111	228	Abundance	0	0	0	1	Good	LFT	2017-08-28	SO-2017.1	0
SO_C_20170728_A_0283.JPG	2017-07-28 14:54:37	58.46904167	-135.9944056	228	Abundance	0	0	0	1	Good	LFT	2017-08-28	SO-2017.1	0
SO_C_20170728_A_0284.JPG	2017-07-28 14:56:11	58.47386667	-135.9778472	220	Abundance	0	0	0	1	Good	LFT	2017-08-28	SO-2017.1	0
SO_C_20170728_A_0285.JPG	2017-07-28 14:56:12	58.47373889	-135.9785917	222	Abundance	0	0	0	1	Good	LFT	2017-08-28	SO-2017.1	0
SO_C_20170728_A_0286.JPG	2017-07-28 14:56:13	58.47361667	-135.9793417	223	Abundance	0	0	0	1	Good	LFT	2017-08-28	SO-2017.1	0
SO_C_20170728_A_0287.JPG	2017-07-28 14:56:14	58.47349722	-135.9800944	223	Abundance	0	0	0	1	Good	LFT	2017-08-28	SO-2017.1	0
SO_C_20170728_A_0288.JPG	2017-07-28 14:56:15	58.47338333	-135.98085	225	Abundance	0	0	0	1	Good	LFT	2017-08-28	SO-2017.1	0
SO_C_20170728_A_0289.JPG	2017-07-28 14:56:16	58.473275	-135.9816167	224	Abundance	0	0	0	1	Good	LFT	2017-08-28	SO-2017.1	0
SO_C_20170728_A_0290.JPG	2017-07-28 14:56:17	58.47317778	-135.9823889	223	Abundance	0	0	0	1	Good	LFT	2017-08-28	SO-2017.1	0
SO_C_20170728_A_0291.JPG	2017-07-28 14:56:18	58.47309167	-135.9831667	223	Abundance	0	0	0	1	Good	LFT	2017-08-28	SO-2017.1	0
SO_C_20170728_A_0292.JPG	2017-07-28 14:56:19	58.47301389	-135.98395	223	Abundance	0	0	0	1	Good	LFT	2017-08-28	SO-2017.1	0
SO_C_20170728_A_0293.JPG	2017-07-28 14:56:20	58.47294444	-135.9847389	222	Abundance	0	0	0	1	Good	LFT	2017-08-28	SO-2017.1	0
SO_C_20170728_A_0294.JPG	2017-07-28 14:56:21	58.47288611	-135.9855333	222	Abundance	0	0	0	1	Good	LFT	2017-08-28	SO-2017.1	0
SO_C_20170728_A_0295.JPG	2017-07-28 14:56:22	58.47283889	-135.9863361	222	Abundance	0	0	0	1	Good	LFT	2017-08-28	SO-2017.1	0
SO_C_20170728_A_0296.JPG	2017-07-28 14:56:23	58.47280278	-135.9871417	222	Abundance	0	0	0	1	Good	LFT	2017-08-28	SO-2017.1	0
SO_C_20170728_A_0297.JPG	2017-07-28 14:56:24	58.47277778	-135.9879528	222	Abundance	0	0	0	1	Good	LFT	2017-08-28	SO-2017.1	0
SO_C_20170728_A_0298.JPG	2017-07-28 14:56:25	58.47275833	-135.9887722	221	Abundance	0	0	0	1	Good	LFT	2017-08-28	SO-2017.1	0
SO_C_20170728_A_0299.JPG	2017-07-28 14:56:26	58.47274444	-135.9895944	220	Abundance	0	0	0	1	Good	LFT	2017-08-28	SO-2017.1	0
SO_C_20170728_A_0300.JPG	2017-07-28 14:56:27	58.47273333	-135.9904194	219	Abundance	0	0	0	1	Good	LFT	2017-08-28	SO-2017.1	0
SO_C_20170728_A_0301.JPG	2017-07-28 14:56:28	58.472725	-135.99125	218	Abundance	0	0	0	1	Good	LFT	2017-08-28	SO-2017.1	0
SO_C_20170728_A_0302.JPG	2017-07-28 14:56:29	58.472725	-135.9920833	218	Abundance	0	0	0	1	Good	LFT	2017-08-28	SO-2017.1	0
SO_C_20170728_A_0303.JPG	2017-07-28 14:56:30	58.47273611	-135.9929222	219	Abundance	0	0	0	1	Good	LFT	2017-08-28	SO-2017.1	0
SO_C_20170728_A_0304.JPG	2017-07-28 14:56:31	58.47274722	-135.9937667	220	Abundance	0	0	1	1	Good	LFT	2017-08-28	SO-2017.1	0
SO_C_20170728_A_0305.JPG	2017-07-28 14:56:32	58.47275556	-135.9946139	220	Abundance	0	0	0	1	Good	LFT	2017-08-28	SO-2017.1	0
SO_C_20170728_A_0306.JPG	2017-07-28 14:56:33	58.47276667	-135.9954639	220	Abundance	0	0	1	0	Good	LFT	2017-08-28	SO-2017.1	0
SO_C_20170728_A_0307.JPG	2017-07-28 14:56:34	58.47277778	-135.9963167	220	Abundance	0	0	1	0	Good	LFT	2017-08-28	SO-2017.1	0
SO_C_20170728_A_0308.JPG	2017-07-28 14:56:35	58.47279167	-135.9971667	219	Abundance	0	0	1	0	Good	LFT	2017-08-28	SO-2017.1	0
SO_C_20170728_A_0309.JPG	2017-07-28 14:56:36	58.47280278	-135.9980167	219	Abundance	0	0	1	0	Good	LFT	2017-08-28	SO-2017.1	0
SO_C_20170728_A_0310.JPG	2017-07-28 14:56:37	58.47281667	-135.9988639	219	Abundance	0	0	1	0	Good	LFT	2017-08-28	SO-2017.1	0
SO_C_20170728_A_0311.JPG	2017-07-28 14:56:38	58.47282778	-135.9997083	220	Abundance	0	0	1	0	Good	LFT	2017-08-28	SO-2017.1	0
SO_C_20170728_A_0312.JPG	2017-07-28 14:56:39	58.47284167	-136.00055	221	Abundance	0	0	1	0	Good	LFT	2017-08-28	SO-2017.1	0
SO_C_20170728_A_0313.JPG	2017-07-28 14:56:40	58.47285278	-136.0013861	222	Abundance	0	0	1	0	Good	LFT	2017-08-28	SO-2017.1	0
SO_C_20170728_A_0314.JPG	2017-07-28 14:56:41	58.47286389	-136.0022222	222	Abundance	0	0	1	0	Good	LFT	2017-08-28	SO-2017.1	0
SO_C_20170728_A_0315.JPG	2017-07-28 14:56:42	58.472875	-136.0030583	223	Abundance	0	0	0	0	Good	LFT	2017-08-28	SO-2017.1	0
SO_C_20170728_A_0316.JPG	2017-07-28 14:56:43	58.47288333	-136.0038917	223	Abundance	0	0	0	0	Good	LFT	2017-08-28	SO-2017.1	0
SO_C_20170728_A_0317.JPG	2017-07-28 14:56:44	58.47289167	-136.004725	224	Abundance	0	0	0	0	Good	LFT	2017-08-28	SO-2017.1	0
SO_C_20170728_A_0318.JPG	2017-07-28 14:56:45	58.47289722	-136.0055583	224	Abundance	0	0	1	0	Good	LFT	2017-08-28	SO-2017.1	0
SO_C_20170728_A_0319.JPG	2017-07-28 14:56:46	58.47289722	-136.0063917	224	Abundance	0	0	1	0	Good	LFT	2017-08-28	SO-2017.1	0
SO_C_20170728_A_0320.JPG	2017-07-28 14:56:47	58.47289167	-136.0072278	224	Abundance	0	0	0	0	Good	LFT	2017-08-28	SO-2017.1	0
SO_C_20170728_A_0321.JPG	2017-07-28 14:56:48	58.47288889	-136.0080667	223	Abundance	0	0	0	0	Good	LFT	2017-08-28	SO-2017.1	0
SO_C_20170728_A_0322.JPG	2017-07-28 14:56:49	58.47288333	-136.0089056	222	Abundance	0	0	1	0	Good	LFT	2017-08-28	SO-2017.1	0
SO_C_20170728_A_0323.JPG	2017-07-28 14:56:50	58.472875	-136.0097444	222	Abundance	0	0	1	0	Good	LFT	2017-08-28	SO-2017.1	0
SO_C_20170728_A_0324.JPG	2017-07-28 14:56:51	58.47286111	-136.0105889	222	Abundance	0	0	1	0	Good	LFT	2017-08-28	SO-2017.1	0
SO_C_20170728_A_0325.JPG	2017-07-28 14:56:52	58.47284167	-136.0114361	221	Abundance	0	0	1	0	Good	LFT	2017-08-28	SO-2017.1	0
SO_C_20170728_A_0326.JPG	2017-07-28 14:56:53	58.47281944	-136.0122861	220	Abundance	0	0	0	0	Good	LFT	2017-08-28	SO-2017.1	0
SO_C_20170728_A_0327.JPG	2017-07-28 14:56:54	58.47279444	-136.0131417	219	Abundance	0	0	0	0	Good	LFT	2017-08-28	SO-2017.1	0
SO_C_20170728_A_0328.JPG	2017-07-28 14:56:55	58.47276667	-136.014	218	Abundance	0	0	1	0	Good	LFT	2017-08-28	SO-2017.1	0
SO_C_20170728_A_0329.JPG	2017-07-28 14:56:56	58.47273611	-136.0148583	217	Abundance	0	0	1	0	Good	LFT	2017-08-28	SO-2017.1	0
SO_C_20170728_A_0330.JPG	2017-07-28 14:56:57	58.47270556	-136.0157194	217	Abundance	0	0	0	0	Good	LFT	2017-08-28	SO-2017.1	0
SO_C_20170728_A_0331.JPG	2017-07-28 14:56:58	58.47267222	-136.0165806	216	Abundance	0	0	0	0	Good	LFT	2017-08-28	SO-2017.1	0
SO_C_20170728_A_0332.JPG	2017-07-28 14:56:59	58.47263889	-136.0174417	215	Abundance	0	0	0	0	Good	LFT	2017-08-28	SO-2017.1	0
SO_C_20170728_A_0333.JPG	2017-07-28 14:57:00	58.47260556	-136.0183028	216	Abundance	0	0	0	0	Good	LFT	2017-08-28	SO-2017.1	0
SO_C_20170728_A_0334.JPG	2017-07-28 14:57:01	58.47257778	-136.0191611	216	Abundance	0	0	0	0	Good	LFT	2017-08-28	SO-2017.1	0
SO_C_20170728_A_0335.JPG	2017-07-28 14:57:02	58.47255	-136.0200167	217	Abundance	0	0	0	0	Good	LFT	2017-08-28	SO-2017.1	0
SO_C_20170728_A_0336.JPG	2017-07-28 14:57:03	58.472525	-136.0208667	217	Abundance	0	0	0	0	Good	LFT	2017-08-28	SO-2017.1	0
SO_C_20170728_A_0337.JPG	2017-07-28 14:57:04	58.47250278	-136.0217167	219	Abundance	0	0	0	0	Good	LFT	2017-08-28	SO-2017.1	0
SO_C_20170728_A_0338.JPG	2017-07-28 14:57:05	58.47248333	-136.0225611	220	Abundance	0	0	0	0	Good	LFT	2017-08-28	SO-2017.1	0
SO_C_20170728_A_0339.JPG	2017-07-28 14:57:06	58.47246667	-136.0234028	221	Abundance	0	0	0	0	Good	LFT	2017-08-28	SO-2017.1	0
SO_C_20170728_A_0340.JPG	2017-07-28 14:57:07	58.47245278	-136.0242389	221	Abundance	0	0	0	0	Good	LFT	2017-08-28	SO-2017.1	0
SO_C_20170728_A_0341.JPG	2017-07-28 14:57:08	58.47244722	-136.0250722	222	Abundance	0	0	0	0	Good	LFT	2017-08-28	SO-2017.1	0
SO_C_20170728_A_0342.JPG	2017-07-28 14:57:09	58.47244722	-136.0259056	222	Abundance	0	0	0	0	Good	LFT	2017-08-28	SO-2017.1	0
SO_C_20170728_A_0343.JPG	2017-07-28 14:57:10	58.47245278	-136.0267389	222	Abundance	0	0	0	0	Good	LFT	2017-08-28	SO-2017.1	0
SO_C_20170728_A_0344.JPG	2017-07-28 14:57:11	58.47246389	-136.0275722	223	Abundance	0	0	0	0	Good	LFT	2017-08-28	SO-2017.1	0
SO_C_20170728_A_0345.JPG	2017-07-28 14:57:12	58.47247778	-136.0284056	222	Abundance	0	0	1	0	Good	LFT	2017-08-28	SO-2017.1	0
SO_C_20170728_A_0346.JPG	2017-07-28 14:57:13	58.47249444	-136.0292389	222	Abundance	0	0	1	0	Good	LFT	2017-08-28	SO-2017.1	0
SO_C_20170728_A_0347.JPG	2017-07-28 14:57:14	58.47251111	-136.0300722	223	Abundance	0	0	0	0	Good	LFT	2017-08-28	SO-2017.1	0
SO_C_20170728_A_0348.JPG	2017-07-28 14:57:15	58.47252778	-136.0309083	222	Abundance	0	0	0	0	Good	LFT	2017-08-28	SO-2017.1	0
SO_C_20170728_A_0349.JPG	2017-07-28 14:57:16	58.47254444	-136.0317444	221	Abundance	0	0	0	0	Good	LFT	2017-08-28	SO-2017.1	0
SO_C_20170728_A_0350.JPG	2017-07-28 14:57:17	58.47256111	-136.0325833	222	Abundance	0	0	1	0	Good	LFT	2017-08-28	SO-2017.1	0
SO_C_20170728_A_0351.JPG	2017-07-28 14:57:18	58.47257222	-136.0334222	221	Abundance	0	0	1	0	Good	LFT	2017-08-28	SO-2017.1	0
SO_C_20170728_A_0352.JPG	2017-07-28 14:57:19	58.47258333	-136.0342611	221	Abundance	0	0	1	0	Good	LFT	2017-08-28	SO-2017.1	0
SO_C_20170728_A_0353.JPG	2017-07-28 14:57:20	58.47258889	-136.0351028	221	Abundance	0	0	0	0	Good	LFT	2017-08-28	SO-2017.1	0
SO_C_20170728_A_0356.JPG	2017-07-28 14:57:23	58.47259444	-136.0376306	221	Abundance	0	0	0	0	Good	LFT	2017-08-28	SO-2017.1	0
SO_C_20170728_A_0357.JPG	2017-07-28 14:57:24	58.47258889	-136.0384722	221	Abundance	0	0	0	0	Good	LFT	2017-08-28	SO-2017.1	0
SO_C_20170728_A_0358.JPG	2017-07-28 14:57:25	58.47257778	-136.0393139	221	Abundance	0	0	1	0	Good	LFT	2017-08-28	SO-2017.1	0
SO_C_20170728_A_0359.JPG	2017-07-28 14:57:26	58.47256389	-136.0401556	221	Abundance	0	0	0	0	Good	LFT	2017-08-28	SO-2017.1	0
SO_C_20170728_A_0360.JPG	2017-07-28 14:57:27	58.47254444	-136.0409972	221	Abundance	0	0	0	0	Good	LFT	2017-08-28	SO-2017.1	0
SO_C_20170728_A_0361.JPG	2017-07-28 14:57:28	58.472525	-136.0418417	221	Abundance	0	0	0	0	Good	LFT	2017-08-28	SO-2017.1	0
SO_C_20170728_A_0362.JPG	2017-07-28 14:57:29	58.47250278	-136.0426833	221	Abundance	0	0	0	0	Good	LFT	2017-08-28	SO-2017.1	0
SO_C_20170728_A_0363.JPG	2017-07-28 14:57:30	58.47247778	-136.0435306	220	Abundance	0	0	0	0	Good	LFT	2017-08-28	SO-2017.1	0
SO_C_20170728_A_0364.JPG	2017-07-28 14:57:31	58.47245278	-136.044375	220	Abundance	0	0	0	0	Good	LFT	2017-08-28	SO-2017.1	0
SO_C_20170728_A_0365.JPG	2017-07-28 14:57:32	58.47242778	-136.0452194	220	Abundance	0	0	0	0	Good	LFT	2017-08-28	SO-2017.1	0
SO_C_20170728_A_0366.JPG	2017-07-28 14:57:33	58.47240278	-136.0460667	220	Abundance	0	0	0	0	Good	LFT	2017-08-28	SO-2017.1	0
SO_C_20170728_A_0367.JPG	2017-07-28 14:57:34	58.47238056	-136.0469139	220	Abundance	0	0	0	0	Good	LFT	2017-08-28	SO-2017.1	0
SO_C_20170728_A_0368.JPG	2017-07-28 14:57:35	58.47236111	-136.0477639	220	Abundance	0	0	0	0	Good	LFT	2017-08-28	SO-2017.1	0
SO_C_20170728_A_0369.JPG	2017-07-28 14:57:36	58.47234444	-136.0486111	219	Abundance	0	0	1	0	Good	LFT	2017-08-28	SO-2017.1	0
SO_C_20170728_A_0370.JPG	2017-07-28 14:57:37	58.47233056	-136.0494611	219	Abundance	0	0	1	0	Good	LFT	2017-08-28	SO-2017.1	0
SO_C_20170728_A_0371.JPG	2017-07-28 14:57:38	58.47231944	-136.0503111	219	Abundance	0	0	0	0	Good	LFT	2017-08-28	SO-2017.1	0
SO_C_20170728_A_0372.JPG	2017-07-28 14:57:39	58.47231111	-136.0511611	219	Abundance	0	0	0	0	Good	LFT	2017-08-28	SO-2017.1	0
SO_C_20170728_A_0373.JPG	2017-07-28 14:57:40	58.47230278	-136.0520111	219	Abundance	0	0	0	0	Good	LFT	2017-08-28	SO-2017.1	0
SO_C_20170728_A_0374.JPG	2017-07-28 14:57:41	58.47229722	-136.0528639	218	Abundance	0	0	0	0	Good	LFT	2017-08-28	SO-2017.1	0
SO_C_20170728_A_0375.JPG	2017-07-28 14:57:42	58.47229167	-136.0537139	218	Abundance	0	0	0	0	Good	LFT	2017-08-28	SO-2017.1	0
SO_C_20170728_A_0376.JPG	2017-07-28 14:57:43	58.47228889	-136.0545667	218	Abundance	0	0	0	0	Good	LFT	2017-08-28	SO-2017.1	0
SO_C_20170728_A_0377.JPG	2017-07-28 14:57:44	58.47228889	-136.0554167	218	Abundance	0	0	0	0	Good	LFT	2017-08-28	SO-2017.1	0
SO_C_20170728_A_0378.JPG	2017-07-28 14:57:45	58.47229167	-136.0562694	218	Abundance	0	0	0	0	Good	LFT	2017-08-28	SO-2017.1	0
SO_C_20170728_A_0379.JPG	2017-07-28 14:57:46	58.47229444	-136.0571194	218	Abundance	0	0	0	0	Good	LFT	2017-08-28	SO-2017.1	0
SO_C_20170728_A_0380.JPG	2017-07-28 14:57:47	58.4723	-136.0579694	218	Abundance	0	0	0	0	Good	LFT	2017-08-28	SO-2017.1	0
SO_C_20170728_A_0381.JPG	2017-07-28 14:57:48	58.47230556	-136.0588139	219	Abundance	0	0	0	0	Good	LFT	2017-08-28	SO-2017.1	0
SO_C_20170728_A_0382.JPG	2017-07-28 14:57:49	58.47231111	-136.0596583	219	Abundance	0	0	0	0	Good	LFT	2017-08-28	SO-2017.1	0
SO_C_20170728_A_0383.JPG	2017-07-28 14:57:50	58.47231389	-136.0605	220	Abundance	0	0	0	0	Good	LFT	2017-08-28	SO-2017.1	0
SO_C_20170728_A_0384.JPG	2017-07-28 14:57:51	58.47231944	-136.0613389	220	Abundance	0	0	0	0	Good	LFT	2017-08-28	SO-2017.1	0
SO_C_20170728_A_0385.JPG	2017-07-28 14:57:52	58.47232222	-136.0621722	222	Abundance	0	0	0	0	Good	LFT	2017-08-28	SO-2017.1	0
SO_C_20170728_A_0386.JPG	2017-07-28 14:57:53	58.472325	-136.0630028	223	Abundance	0	0	1	0	Good	LFT	2017-08-28	SO-2017.1	0
SO_C_20170728_A_0387.JPG	2017-07-28 14:57:54	58.472325	-136.0638306	224	Abundance	0	0	1	0	Good	LFT	2017-08-28	SO-2017.1	0
SO_C_20170728_A_0388.JPG	2017-07-28 14:57:55	58.472325	-136.0646583	224	Abundance	0	0	0	0	Good	LFT	2017-08-28	SO-2017.1	0
SO_C_20170728_A_0389.JPG	2017-07-28 14:57:56	58.47232222	-136.0654833	224	Abundance	0	0	1	0	Good	LFT	2017-08-28	SO-2017.1	0
SO_C_20170728_A_0390.JPG	2017-07-28 14:57:57	58.47231944	-136.0663083	225	Abundance	0	0	0	0	Good	LFT	2017-08-28	SO-2017.1	0
SO_C_20170728_A_0391.JPG	2017-07-28 14:57:58	58.47231389	-136.0671361	224	Abundance	0	0	0	0	Good	LFT	2017-08-28	SO-2017.1	0
SO_C_20170728_A_0392.JPG	2017-07-28 14:57:59	58.47230833	-136.0679639	224	Abundance	0	0	0	0	Good	LFT	2017-08-28	SO-2017.1	0
SO_C_20170728_A_0393.JPG	2017-07-28 14:58:00	58.4723	-136.0687944	224	Abundance	0	0	0	0	Good	LFT	2017-08-28	SO-2017.1	0
SO_C_20170728_A_0394.JPG	2017-07-28 14:58:01	58.47228889	-136.069625	223	Abundance	0	0	0	0	Good	LFT	2017-08-28	SO-2017.1	0
SO_C_20170728_A_0395.JPG	2017-07-28 14:58:02	58.472275	-136.0704556	223	Abundance	0	0	0	0	Good	LFT	2017-08-28	SO-2017.1	0
SO_C_20170728_A_0396.JPG	2017-07-28 14:58:03	58.47225833	-136.0712889	223	Abundance	0	0	1	0	Good	LFT	2017-08-28	SO-2017.1	0
SO_C_20170728_A_0397.JPG	2017-07-28 14:58:04	58.47223889	-136.0721194	222	Abundance	0	0	1	0	Good	LFT	2017-08-28	SO-2017.1	0
SO_C_20170728_A_0398.JPG	2017-07-28 14:58:05	58.47221944	-136.0729528	222	Abundance	0	0	0	0	Good	LFT	2017-08-28	SO-2017.1	0
SO_C_20170728_A_0399.JPG	2017-07-28 14:58:06	58.4722	-136.0737833	222	Abundance	0	0	1	0	Good	LFT	2017-08-28	SO-2017.1	0
SO_C_20170728_A_0400.JPG	2017-07-28 14:58:07	58.47217778	-136.0746167	222	Abundance	0	0	1	0	Good	LFT	2017-08-28	SO-2017.1	0
SO_C_20170728_A_0401.JPG	2017-07-28 14:58:08	58.47215556	-136.0754472	222	Abundance	0	0	1	0	Good	LFT	2017-08-28	SO-2017.1	0
SO_C_20170728_A_0402.JPG	2017-07-28 14:58:09	58.47213056	-136.0762806	222	Abundance	0	0	1	0	Good	LFT	2017-08-28	SO-2017.1	0
SO_C_20170728_A_0403.JPG	2017-07-28 14:58:10	58.47210833	-136.0771111	221	Abundance	0	0	1	0	Good	LFT	2017-08-28	SO-2017.1	0
SO_C_20170728_A_0404.JPG	2017-07-28 14:58:11	58.47208333	-136.0779444	221	Abundance	0	0	0	0	Good	LFT	2017-08-28	SO-2017.1	0
SO_C_20170728_A_0405.JPG	2017-07-28 14:58:12	58.47206111	-136.0787806	221	Abundance	0	0	1	0	Good	LFT	2017-08-28	SO-2017.1	0
SO_C_20170728_A_0406.JPG	2017-07-28 14:58:13	58.47204167	-136.0796139	221	Abundance	0	0	1	0	Good	LFT	2017-08-28	SO-2017.1	0
SO_C_20170728_A_0407.JPG	2017-07-28 14:58:14	58.47202222	-136.08045	221	Abundance	0	0	1	0	Good	LFT	2017-08-28	SO-2017.1	0
SO_C_20170728_A_0408.JPG	2017-07-28 14:58:15	58.47200833	-136.0812833	221	Abundance	0	0	1	1	Good	LFT	2017-08-28	SO-2017.1	0
SO_C_20170728_A_0409.JPG	2017-07-28 14:58:16	58.47199722	-136.0821194	221	Abundance	0	0	1	1	Good	LFT	2017-08-28	SO-2017.1	0
SO_C_20170728_A_0410.JPG	2017-07-28 14:58:17	58.47198889	-136.0829528	220	Abundance	0	0	1	1	Good	LFT	2017-08-28	SO-2017.1	0
SO_C_20170728_A_0411.JPG	2017-07-28 14:58:18	58.47198889	-136.0837889	220	Abundance	0	0	1	1	Good	LFT	2017-08-28	SO-2017.1	0
SO_C_20170728_A_0412.JPG	2017-07-28 14:58:19	58.47198889	-136.0846222	220	Abundance	0	0	0	0	Good	LFT	2017-08-28	SO-2017.1	0
SO_C_20170728_A_0413.JPG	2017-07-28 14:58:20	58.47198889	-136.0854528	220	Abundance	0	0	0	1	Good	LFT	2017-08-28	SO-2017.1	0
SO_C_20170728_A_0414.JPG	2017-07-28 14:58:21	58.47199167	-136.0862861	221	Abundance	0	0	0	1	Good	LFT	2017-08-28	SO-2017.1	0
SO_C_20170728_A_0415.JPG	2017-07-28 14:58:22	58.47199444	-136.0871167	221	Abundance	0	0	0	1	Good	LFT	2017-08-28	SO-2017.1	0
SO_C_20170728_A_0416.JPG	2017-07-28 14:58:23	58.47199722	-136.0879444	221	Abundance	0	0	0	1	Good	LFT	2017-08-28	SO-2017.1	0
SO_C_20170728_A_0417.JPG	2017-07-28 14:59:53	58.47592222	-136.1062056	214	Abundance	0	0	0	1	Good	LFT	2017-08-28	SO-2017.1	0
SO_C_20170728_A_0418.JPG	2017-07-28 14:59:54	58.47582222	-136.1054139	215	Abundance	0	0	0	1	Good	LFT	2017-08-28	SO-2017.1	0
SO_C_20170728_A_0419.JPG	2017-07-28 14:59:55	58.475725	-136.1046222	216	Abundance	0	0	0	1	Good	LFT	2017-08-28	SO-2017.1	0
SO_C_20170728_A_0420.JPG	2017-07-28 14:59:56	58.47563333	-136.1038333	216	Abundance	0	0	0	1	Good	LFT	2017-08-28	SO-2017.1	0
SO_C_20170728_A_0421.JPG	2017-07-28 14:59:57	58.47554722	-136.1030444	216	Abundance	0	0	0	1	Good	LFT	2017-08-28	SO-2017.1	0
SO_C_20170728_A_0422.JPG	2017-07-28 14:59:58	58.47546667	-136.1022556	217	Abundance	0	0	0	1	Good	LFT	2017-08-28	SO-2017.1	0
SO_C_20170728_A_0423.JPG	2017-07-28 14:59:59	58.47539167	-136.1014639	218	Abundance	0	0	0	1	Good	LFT	2017-08-28	SO-2017.1	0
SO_C_20170728_A_0424.JPG	2017-07-28 15:00:00	58.47532778	-136.1006722	219	Abundance	0	0	0	1	Good	LFT	2017-08-28	SO-2017.1	0
SO_C_20170728_A_0425.JPG	2017-07-28 15:00:01	58.475275	-136.0998778	219	Abundance	0	0	1	1	Good	LFT	2017-08-28	SO-2017.1	0
SO_C_20170728_A_0426.JPG	2017-07-28 15:00:02	58.47523333	-136.0990833	220	Abundance	0	0	1	1	Good	LFT	2017-08-28	SO-2017.1	0
SO_C_20170728_A_0427.JPG	2017-07-28 15:00:03	58.47520556	-136.0982861	220	Abundance	0	0	0	1	Good	LFT	2017-08-28	SO-2017.1	0
SO_C_20170728_A_0428.JPG	2017-07-28 15:00:04	58.47518889	-136.0974917	221	Abundance	0	0	0	1	Good	LFT	2017-08-28	SO-2017.1	0
SO_C_20170728_A_0429.JPG	2017-07-28 15:00:05	58.47518611	-136.0966972	221	Abundance	0	0	0	1	Good	LFT	2017-08-28	SO-2017.1	0
SO_C_20170728_A_0430.JPG	2017-07-28 15:00:06	58.47519167	-136.0959	222	Abundance	0	0	0	1	Good	LFT	2017-08-28	SO-2017.1	0
SO_C_20170728_A_0431.JPG	2017-07-28 15:00:07	58.47520556	-136.0951028	222	Abundance	0	0	0	1	Good	LFT	2017-08-28	SO-2017.1	0
SO_C_20170728_A_0432.JPG	2017-07-28 15:00:08	58.47523056	-136.0943056	222	Abundance	0	0	0	1	Good	LFT	2017-08-28	SO-2017.1	0
SO_C_20170728_A_0433.JPG	2017-07-28 15:00:09	58.47525833	-136.0935083	221	Abundance	0	0	0	1	Good	LFT	2017-08-28	SO-2017.1	0
SO_C_20170728_A_0434.JPG	2017-07-28 15:00:10	58.47528889	-136.0927083	221	Abundance	0	0	0	1	Good	LFT	2017-08-28	SO-2017.1	0
SO_C_20170728_A_0435.JPG	2017-07-28 15:00:11	58.475325	-136.0919083	222	Abundance	0	0	1	1	Good	LFT	2017-08-28	SO-2017.1	0
SO_C_20170728_A_0436.JPG	2017-07-28 15:00:12	58.47536389	-136.0911083	222	Abundance	0	0	1	0	Good	LFT	2017-08-28	SO-2017.1	0
SO_C_20170728_A_0437.JPG	2017-07-28 15:00:13	58.47540556	-136.0903111	222	Abundance	0	0	1	0	Good	LFT	2017-08-28	SO-2017.1	0
SO_C_20170728_A_0438.JPG	2017-07-28 15:00:14	58.47544722	-136.0895083	223	Abundance	0	0	1	1	Good	LFT	2017-08-28	SO-2017.1	0
SO_C_20170728_A_0439.JPG	2017-07-28 15:00:15	58.47548889	-136.0887056	222	Abundance	0	0	1	0	Good	LFT	2017-08-28	SO-2017.1	0
SO_C_20170728_A_0440.JPG	2017-07-28 15:00:16	58.47553056	-136.0879	223	Abundance	0	0	1	0	Good	LFT	2017-08-28	SO-2017.1	0
SO_C_20170728_A_0441.JPG	2017-07-28 15:00:17	58.47556944	-136.0870944	223	Abundance	0	0	0	0	Good	LFT	2017-08-28	SO-2017.1	0
SO_C_20170728_A_0442.JPG	2017-07-28 15:00:18	58.47560833	-136.0862861	223	Abundance	0	0	0	0	Good	LFT	2017-08-28	SO-2017.1	0
SO_C_20170728_A_0443.JPG	2017-07-28 15:00:19	58.47564722	-136.085475	224	Abundance	0	0	0	0	Good	LFT	2017-08-28	SO-2017.1	0
SO_C_20170728_A_0444.JPG	2017-07-28 15:00:20	58.47568611	-136.0846639	225	Abundance	0	0	0	0	Good	LFT	2017-08-28	SO-2017.1	0
SO_C_20170728_A_0445.JPG	2017-07-28 15:00:21	58.47572778	-136.0838528	225	Abundance	0	0	0	0	Good	LFT	2017-08-28	SO-2017.1	0
SO_C_20170728_A_0446.JPG	2017-07-28 15:00:22	58.47576667	-136.0830417	226	Abundance	0	0	0	0	Good	LFT	2017-08-28	SO-2017.1	0
SO_C_20170728_A_0447.JPG	2017-07-28 15:00:23	58.47580278	-136.0822278	226	Abundance	0	0	0	0	Good	LFT	2017-08-28	SO-2017.1	0
SO_C_20170728_A_0448.JPG	2017-07-28 15:00:24	58.47583889	-136.0814139	227	Abundance	0	0	0	0	Good	LFT	2017-08-28	SO-2017.1	0
SO_C_20170728_A_0449.JPG	2017-07-28 15:00:25	58.47586944	-136.0806	227	Abundance	0	0	1	0	Good	LFT	2017-08-28	SO-2017.1	0
SO_C_20170728_A_0450.JPG	2017-07-28 15:00:26	58.4759	-136.0797806	227	Abundance	0	0	1	0	Good	LFT	2017-08-28	SO-2017.1	0
SO_C_20170728_A_0451.JPG	2017-07-28 15:00:27	58.47592222	-136.0789639	228	Abundance	0	0	1	0	Good	LFT	2017-08-28	SO-2017.1	0
SO_C_20170728_A_0452.JPG	2017-07-28 15:00:28	58.47594444	-136.0781417	228	Abundance	0	0	0	0	Good	LFT	2017-08-28	SO-2017.1	0
SO_C_20170728_A_0453.JPG	2017-07-28 15:00:29	58.47596111	-136.0773194	228	Abundance	0	0	0	0	Good	LFT	2017-08-28	SO-2017.1	0
SO_C_20170728_A_0454.JPG	2017-07-28 15:00:30	58.475975	-136.0764944	228	Abundance	0	0	0	0	Good	LFT	2017-08-28	SO-2017.1	0
SO_C_20170728_A_0455.JPG	2017-07-28 15:00:31	58.47598889	-136.0756667	228	Abundance	0	0	0	0	Good	LFT	2017-08-28	SO-2017.1	0
SO_C_20170728_A_0456.JPG	2017-07-28 15:00:32	58.476	-136.0748361	228	Abundance	0	0	0	0	Good	LFT	2017-08-28	SO-2017.1	0
SO_C_20170728_A_0457.JPG	2017-07-28 15:00:33	58.47601111	-136.0740028	228	Abundance	0	0	1	0	Good	LFT	2017-08-28	SO-2017.1	0
SO_C_20170728_A_0458.JPG	2017-07-28 15:00:34	58.47601667	-136.0731694	228	Abundance	0	0	1	0	Good	LFT	2017-08-28	SO-2017.1	0
SO_C_20170728_A_0459.JPG	2017-07-28 15:00:35	58.47601667	-136.0723306	228	Abundance	0	0	0	0	Good	LFT	2017-08-28	SO-2017.1	0
SO_C_20170728_A_0460.JPG	2017-07-28 15:00:36	58.47601389	-136.0714917	228	Abundance	0	0	0	0	Good	LFT	2017-08-28	SO-2017.1	0
SO_C_20170728_A_0461.JPG	2017-07-28 15:00:37	58.47600556	-136.0706528	228	Abundance	0	0	0	0	Good	LFT	2017-08-28	SO-2017.1	0
SO_C_20170728_A_0462.JPG	2017-07-28 15:00:38	58.47599444	-136.0698139	228	Abundance	0	0	0	0	Good	LFT	2017-08-28	SO-2017.1	0
SO_C_20170728_A_0463.JPG	2017-07-28 15:00:39	58.47598056	-136.0689722	228	Abundance	0	0	0	0	Good	LFT	2017-08-28	SO-2017.1	0
SO_C_20170728_A_0464.JPG	2017-07-28 15:00:40	58.47596667	-136.0681278	227	Abundance	0	0	0	0	Good	LFT	2017-08-28	SO-2017.1	0
SO_C_20170728_A_0465.JPG	2017-07-28 15:00:41	58.47595278	-136.0672833	227	Abundance	0	0	0	0	Good	LFT	2017-08-28	SO-2017.1	0
SO_C_20170728_A_0466.JPG	2017-07-28 15:00:42	58.47594167	-136.0664361	226	Abundance	0	0	1	0	Good	LFT	2017-08-28	SO-2017.1	0
SO_C_20170728_A_0467.JPG	2017-07-28 15:00:43	58.47593056	-136.0655889	227	Abundance	0	0	1	0	Good	LFT	2017-08-28	SO-2017.1	0
SO_C_20170728_A_0468.JPG	2017-07-28 15:00:44	58.47592222	-136.0647417	226	Abundance	0	0	1	0	Good	LFT	2017-08-28	SO-2017.1	0
SO_C_20170728_A_0469.JPG	2017-07-28 15:00:45	58.47591667	-136.0638917	226	Abundance	0	0	1	0	Good	LFT	2017-08-28	SO-2017.1	0
SO_C_20170728_A_0470.JPG	2017-07-28 15:00:46	58.47591111	-136.0630417	226	Abundance	0	0	1	0	Good	LFT	2017-08-28	SO-2017.1	0
SO_C_20170728_A_0471.JPG	2017-07-28 15:00:47	58.47590278	-136.0621889	226	Abundance	0	0	1	0	Good	LFT	2017-08-28	SO-2017.1	0
SO_C_20170728_A_0472.JPG	2017-07-28 15:00:48	58.47589722	-136.0613361	226	Abundance	0	0	0	0	Good	LFT	2017-08-28	SO-2017.1	0
SO_C_20170728_A_0473.JPG	2017-07-28 15:00:49	58.47588889	-136.0604833	226	Abundance	0	0	0	0	Good	LFT	2017-08-28	SO-2017.1	0
SO_C_20170728_A_0474.JPG	2017-07-28 15:00:50	58.47588611	-136.0596333	225	Abundance	0	0	0	0	Good	LFT	2017-08-28	SO-2017.1	0
SO_C_20170728_A_0475.JPG	2017-07-28 15:00:51	58.47588611	-136.0587806	225	Abundance	0	0	0	0	Good	LFT	2017-08-28	SO-2017.1	0
SO_C_20170728_A_0476.JPG	2017-07-28 15:00:52	58.47588889	-136.0579333	225	Abundance	0	0	0	0	Good	LFT	2017-08-28	SO-2017.1	0
SO_C_20170728_A_0477.JPG	2017-07-28 15:00:53	58.47589722	-136.0570861	225	Abundance	0	0	0	0	Good	LFT	2017-08-28	SO-2017.1	0
SO_C_20170728_A_0478.JPG	2017-07-28 15:00:54	58.47590556	-136.0562389	225	Abundance	0	0	0	0	Good	LFT	2017-08-28	SO-2017.1	0
SO_C_20170728_A_0479.JPG	2017-07-28 15:00:55	58.47591944	-136.0553972	226	Abundance	0	0	0	0	Good	LFT	2017-08-28	SO-2017.1	0
SO_C_20170728_A_0480.JPG	2017-07-28 15:00:56	58.47593889	-136.0545583	226	Abundance	0	0	0	0	Good	LFT	2017-08-28	SO-2017.1	0
SO_C_20170728_A_0481.JPG	2017-07-28 15:00:57	58.47595833	-136.0537194	226	Abundance	0	0	0	0	Good	LFT	2017-08-28	SO-2017.1	0
SO_C_20170728_A_0482.JPG	2017-07-28 15:00:58	58.47598056	-136.0528833	226	Abundance	0	0	1	0	Good	LFT	2017-08-28	SO-2017.1	0
SO_C_20170728_A_0483.JPG	2017-07-28 15:00:59	58.47600556	-136.05205	226	Abundance	0	0	1	0	Good	LFT	2017-08-28	SO-2017.1	0
SO_C_20170728_A_0484.JPG	2017-07-28 15:01:00	58.47603056	-136.0512167	226	Abundance	0	0	0	0	Good	LFT	2017-08-28	SO-2017.1	0
SO_C_20170728_A_0485.JPG	2017-07-28 15:01:01	58.47605556	-136.0503861	226	Abundance	0	0	0	0	Good	LFT	2017-08-28	SO-2017.1	0
SO_C_20170728_A_0486.JPG	2017-07-28 15:01:02	58.47608056	-136.0495556	226	Abundance	0	0	0	0	Good	LFT	2017-08-28	SO-2017.1	0
SO_C_20170728_A_0487.JPG	2017-07-28 15:01:03	58.47610556	-136.0487278	226	Abundance	0	0	0	0	Good	LFT	2017-08-28	SO-2017.1	0
SO_C_20170728_A_0488.JPG	2017-07-28 15:01:04	58.47612778	-136.0479	226	Abundance	0	0	0	0	Good	LFT	2017-08-28	SO-2017.1	0
SO_C_20170728_A_0489.JPG	2017-07-28 15:01:05	58.47615	-136.047075	225	Abundance	0	0	0	0	Good	LFT	2017-08-28	SO-2017.1	0
SO_C_20170728_A_0490.JPG	2017-07-28 15:01:06	58.47616944	-136.0462472	226	Abundance	0	0	0	0	Good	LFT	2017-08-28	SO-2017.1	0
SO_C_20170728_A_0491.JPG	2017-07-28 15:01:07	58.47618333	-136.0454222	225	Abundance	0	0	1	0	Good	LFT	2017-08-28	SO-2017.1	0
SO_C_20170728_A_0492.JPG	2017-07-28 15:01:08	58.47619722	-136.0445944	225	Abundance	0	0	1	0	Good	LFT	2017-08-28	SO-2017.1	0
SO_C_20170728_A_0493.JPG	2017-07-28 15:01:09	58.47620833	-136.0437694	224	Abundance	0	0	1	0	Good	LFT	2017-08-28	SO-2017.1	0
SO_C_20170728_A_0494.JPG	2017-07-28 15:01:10	58.47621389	-136.0429444	224	Abundance	0	0	1	0	Good	LFT	2017-08-28	SO-2017.1	0
SO_C_20170728_A_0495.JPG	2017-07-28 15:01:11	58.47621667	-136.0421194	223	Abundance	0	0	0	0	Good	LFT	2017-08-28	SO-2017.1	0
SO_C_20170728_A_0496.JPG	2017-07-28 15:01:12	58.47621389	-136.0412917	223	Abundance	0	0	0	0	Good	LFT	2017-08-28	SO-2017.1	0
SO_C_20170728_A_0497.JPG	2017-07-28 15:01:13	58.47621389	-136.0404667	223	Abundance	0	0	0	0	Good	LFT	2017-08-28	SO-2017.1	0
SO_C_20170728_A_0498.JPG	2017-07-28 15:01:14	58.47620833	-136.0396444	222	Abundance	0	0	0	0	Good	LFT	2017-08-28	SO-2017.1	0
SO_C_20170728_A_0499.JPG	2017-07-28 15:01:15	58.47620278	-136.0388167	222	Abundance	0	0	0	0	Good	LFT	2017-08-28	SO-2017.1	0
SO_C_20170728_A_0500.JPG	2017-07-28 15:01:16	58.47619722	-136.0379917	221	Abundance	0	0	1	0	Good	LFT	2017-08-28	SO-2017.1	0
SO_C_20170728_A_0501.JPG	2017-07-28 15:01:17	58.47619167	-136.0371639	221	Abundance	0	0	1	0	Good	LFT	2017-08-28	SO-2017.1	0
SO_C_20170728_A_0502.JPG	2017-07-28 15:01:18	58.47618333	-136.0363361	220	Abundance	0	0	1	0	Good	LFT	2017-08-28	SO-2017.1	0
SO_C_20170728_A_0503.JPG	2017-07-28 15:01:19	58.476175	-136.0355083	219	Abundance	0	0	1	0	Good	LFT	2017-08-28	SO-2017.1	0
SO_C_20170728_A_0504.JPG	2017-07-28 15:01:20	58.47616389	-136.0346778	219	Abundance	0	0	1	0	Good	LFT	2017-08-28	SO-2017.1	0
SO_C_20170728_A_0505.JPG	2017-07-28 15:01:21	58.47615556	-136.0338472	218	Abundance	0	0	0	0	Good	LFT	2017-08-28	SO-2017.1	0
SO_C_20170728_A_0506.JPG	2017-07-28 15:01:22	58.47614444	-136.0330194	217	Abundance	0	0	0	0	Good	LFT	2017-08-28	SO-2017.1	0
SO_C_20170728_A_0507.JPG	2017-07-28 15:01:23	58.47613056	-136.0321889	217	Abundance	0	0	0	0	Good	LFT	2017-08-28	SO-2017.1	0
SO_C_20170728_A_0508.JPG	2017-07-28 15:01:24	58.47611944	-136.0313639	217	Abundance	0	0	0	0	Good	LFT	2017-08-28	SO-2017.1	0
SO_C_20170728_A_0509.JPG	2017-07-28 15:01:25	58.47610833	-136.0305389	216	Abundance	0	0	0	0	Good	LFT	2017-08-28	SO-2017.1	0
SO_C_20170728_A_0510.JPG	2017-07-28 15:01:26	58.4761	-136.0297167	217	Abundance	0	0	0	0	Good	LFT	2017-08-28	SO-2017.1	0
SO_C_20170728_A_0511.JPG	2017-07-28 15:01:27	58.47609444	-136.0288972	216	Abundance	0	0	0	0	Good	LFT	2017-08-28	SO-2017.1	0
SO_C_20170728_A_0512.JPG	2017-07-28 15:01:28	58.47609444	-136.0280806	217	Abundance	0	0	0	0	Good	LFT	2017-08-28	SO-2017.1	0
SO_C_20170728_A_0513.JPG	2017-07-28 15:01:29	58.47609722	-136.0272694	217	Abundance	0	0	0	0	Good	LFT	2017-08-28	SO-2017.1	0
SO_C_20170728_A_0514.JPG	2017-07-28 15:01:30	58.47610556	-136.0264583	217	Abundance	0	0	0	0	Good	LFT	2017-08-28	SO-2017.1	0
SO_C_20170728_A_0515.JPG	2017-07-28 15:01:31	58.47611944	-136.0256528	217	Abundance	0	0	0	0	Good	LFT	2017-08-28	SO-2017.1	0
SO_C_20170728_A_0516.JPG	2017-07-28 15:01:32	58.47613611	-136.0248472	217	Abundance	0	0	0	0	Good	LFT	2017-08-28	SO-2017.1	0
SO_C_20170728_A_0517.JPG	2017-07-28 15:01:33	58.47615833	-136.0240472	217	Abundance	0	0	0	0	Good	LFT	2017-08-28	SO-2017.1	0
SO_C_20170728_A_0518.JPG	2017-07-28 15:01:34	58.47618333	-136.02325	217	Abundance	0	0	0	0	Good	LFT	2017-08-28	SO-2017.1	0
SO_C_20170728_A_0519.JPG	2017-07-28 15:01:35	58.47620833	-136.0224528	217	Abundance	0	0	1	0	Good	LFT	2017-08-28	SO-2017.1	0
SO_C_20170728_A_0520.JPG	2017-07-28 15:01:36	58.47623611	-136.0216556	216	Abundance	0	0	1	0	Good	LFT	2017-08-28	SO-2017.1	0
SO_C_20170728_A_0521.JPG	2017-07-28 15:01:37	58.47626389	-136.0208583	216	Abundance	0	0	1	0	Good	LFT	2017-08-28	SO-2017.1	0
SO_C_20170728_A_0522.JPG	2017-07-28 15:01:38	58.47628889	-136.0200639	216	Abundance	0	0	0	0	Good	LFT	2017-08-28	SO-2017.1	0
SO_C_20170728_A_0523.JPG	2017-07-28 15:01:39	58.47631389	-136.0192667	215	Abundance	0	0	1	0	Good	LFT	2017-08-28	SO-2017.1	0
SO_C_20170728_A_0524.JPG	2017-07-28 15:01:40	58.47633333	-136.0184722	215	Abundance	0	0	1	0	Good	LFT	2017-08-28	SO-2017.1	0
SO_C_20170728_A_0525.JPG	2017-07-28 15:01:41	58.47635556	-136.017675	216	Abundance	0	0	0	0	Good	LFT	2017-08-28	SO-2017.1	0
SO_C_20170728_A_0526.JPG	2017-07-28 15:01:42	58.476375	-136.0168778	215	Abundance	0	0	0	0	Good	LFT	2017-08-28	SO-2017.1	0
SO_C_20170728_A_0527.JPG	2017-07-28 15:01:43	58.47639444	-136.0160806	215	Abundance	0	0	1	0	Good	LFT	2017-08-28	SO-2017.1	0
SO_C_20170728_A_0528.JPG	2017-07-28 15:01:44	58.47641111	-136.0152833	216	Abundance	0	0	1	0	Good	LFT	2017-08-28	SO-2017.1	0
SO_C_20170728_A_0529.JPG	2017-07-28 15:01:45	58.476425	-136.0144833	216	Abundance	0	0	1	0	Good	LFT	2017-08-28	SO-2017.1	0
SO_C_20170728_A_0530.JPG	2017-07-28 15:01:46	58.47643889	-136.0136806	216	Abundance	0	0	1	0	Good	LFT	2017-08-28	SO-2017.1	0
SO_C_20170728_A_0531.JPG	2017-07-28 15:01:47	58.47644722	-136.0128806	217	Abundance	0	0	1	0	Good	LFT	2017-08-28	SO-2017.1	0
SO_C_20170728_A_0532.JPG	2017-07-28 15:01:48	58.47645556	-136.012075	217	Abundance	0	0	1	0	Good	LFT	2017-08-28	SO-2017.1	0
SO_C_20170728_A_0533.JPG	2017-07-28 15:01:49	58.47646111	-136.0112694	217	Abundance	0	0	1	0	Good	LFT	2017-08-28	SO-2017.1	0
SO_C_20170728_A_0534.JPG	2017-07-28 15:01:50	58.47646111	-136.0104639	217	Abundance	0	0	1	0	Good	LFT	2017-08-28	SO-2017.1	0
SO_C_20170728_A_0535.JPG	2017-07-28 15:01:51	58.47645833	-136.0096528	217	Abundance	0	0	0	0	Good	LFT	2017-08-28	SO-2017.1	0
SO_C_20170728_A_0536.JPG	2017-07-28 15:01:52	58.47645278	-136.0088444	217	Abundance	0	0	1	0	Good	LFT	2017-08-28	SO-2017.1	0
SO_C_20170728_A_0537.JPG	2017-07-28 15:01:53	58.47644167	-136.0080333	217	Abundance	0	0	1	0	Good	LFT	2017-08-28	SO-2017.1	0
SO_C_20170728_A_0538.JPG	2017-07-28 15:01:54	58.47642778	-136.0072194	218	Abundance	0	0	0	0	Good	LFT	2017-08-28	SO-2017.1	0
SO_C_20170728_A_0539.JPG	2017-07-28 15:01:55	58.47641389	-136.0064083	218	Abundance	0	0	0	0	Good	LFT	2017-08-28	SO-2017.1	0
SO_C_20170728_A_0540.JPG	2017-07-28 15:01:56	58.47639722	-136.0055944	218	Abundance	0	0	1	0	Good	LFT	2017-08-28	SO-2017.1	0
SO_C_20170728_A_0541.JPG	2017-07-28 15:01:57	58.47637778	-136.0047833	218	Abundance	0	0	0	0	Good	LFT	2017-08-28	SO-2017.1	0
SO_C_20170728_A_0542.JPG	2017-07-28 15:01:58	58.47635833	-136.0039694	219	Abundance	0	0	1	0	Good	LFT	2017-08-28	SO-2017.1	0
SO_C_20170728_A_0543.JPG	2017-07-28 15:01:59	58.47634167	-136.0031583	219	Abundance	0	0	1	0	Good	LFT	2017-08-28	SO-2017.1	0
SO_C_20170728_A_0544.JPG	2017-07-28 15:02:00	58.47632222	-136.0023472	219	Abundance	0	0	1	0	Good	LFT	2017-08-28	SO-2017.1	0
SO_C_20170728_A_0545.JPG	2017-07-28 15:02:01	58.47630278	-136.0015361	220	Abundance	0	0	1	0	Good	LFT	2017-08-28	SO-2017.1	0
SO_C_20170728_A_0546.JPG	2017-07-28 15:02:02	58.47628611	-136.0007278	221	Abundance	0	0	1	0	Good	LFT	2017-08-28	SO-2017.1	0
SO_C_20170728_A_0547.JPG	2017-07-28 15:02:03	58.47626944	-135.9999167	222	Abundance	0	0	0	0	Good	LFT	2017-08-28	SO-2017.1	0
SO_C_20170728_A_0548.JPG	2017-07-28 15:02:04	58.47625556	-135.9991083	222	Abundance	0	0	1	0	Good	LFT	2017-08-28	SO-2017.1	0
SO_C_20170728_A_0549.JPG	2017-07-28 15:02:05	58.47624722	-135.9983	222	Abundance	0	0	1	0	Good	LFT	2017-08-28	SO-2017.1	0
SO_C_20170728_A_0550.JPG	2017-07-28 15:02:06	58.47624167	-135.9974889	223	Abundance	0	0	0	1	Good	LFT	2017-08-28	SO-2017.1	0
SO_C_20170728_A_0551.JPG	2017-07-28 15:02:07	58.47624167	-135.9966806	223	Abundance	0	0	0	1	Good	LFT	2017-08-28	SO-2017.1	0
SO_C_20170728_A_0552.JPG	2017-07-28 15:02:08	58.47624444	-135.9958722	223	Abundance	0	0	0	1	Good	LFT	2017-08-28	SO-2017.1	0
SO_C_20170728_A_0553.JPG	2017-07-28 15:02:09	58.47625	-135.9950639	223	Abundance	0	0	0	1	Good	LFT	2017-08-28	SO-2017.1	0
SO_C_20170728_A_0554.JPG	2017-07-28 15:02:10	58.47625833	-135.9942556	223	Abundance	0	0	0	1	Good	LFT	2017-08-28	SO-2017.1	0
SO_C_20170728_A_0555.JPG	2017-07-28 15:02:11	58.47626944	-135.9934472	224	Abundance	0	0	0	1	Good	LFT	2017-08-28	SO-2017.1	0
SO_C_20170728_A_0556.JPG	2017-07-28 15:04:07	58.48037222	-135.9784583	218	Abundance	0	0	0	1	Good	LFT	2017-08-28	SO-2017.1	0
SO_C_20170728_A_0557.JPG	2017-07-28 15:04:08	58.48037222	-135.9792722	218	Abundance	0	0	0	1	Good	LFT	2017-08-28	SO-2017.1	0
SO_C_20170728_A_0558.JPG	2017-07-28 15:04:09	58.48037222	-135.9800889	217	Abundance	0	0	0	1	Good	LFT	2017-08-28	SO-2017.1	0
SO_C_20170728_A_0559.JPG	2017-07-28 15:04:10	58.48036944	-135.9809056	217	Abundance	0	0	0	1	Good	LFT	2017-08-28	SO-2017.1	0
SO_C_20170728_A_0560.JPG	2017-07-28 15:04:11	58.48036667	-135.9817222	217	Abundance	0	0	0	1	Good	LFT	2017-08-28	SO-2017.1	0
SO_C_20170728_A_0561.JPG	2017-07-28 15:04:12	58.48036111	-135.9825389	217	Abundance	0	0	0	1	Good	LFT	2017-08-28	SO-2017.1	0
SO_C_20170728_A_0562.JPG	2017-07-28 15:04:13	58.48035278	-135.9833556	216	Abundance	0	0	0	1	Good	LFT	2017-08-28	SO-2017.1	0
SO_C_20170728_A_0563.JPG	2017-07-28 15:04:14	58.48034722	-135.984175	216	Abundance	0	0	0	1	Good	LFT	2017-08-28	SO-2017.1	0
SO_C_20170728_A_0564.JPG	2017-07-28 15:04:15	58.48033611	-135.9849944	216	Abundance	0	0	0	1	Good	LFT	2017-08-28	SO-2017.1	0
SO_C_20170728_A_0565.JPG	2017-07-28 15:04:16	58.480325	-135.9858139	216	Abundance	0	0	0	1	Good	LFT	2017-08-28	SO-2017.1	0
SO_C_20170728_A_0566.JPG	2017-07-28 15:04:17	58.48031389	-135.9866333	216	Abundance	0	0	0	1	Good	LFT	2017-08-28	SO-2017.1	0
SO_C_20170728_A_0567.JPG	2017-07-28 15:04:18	58.48029722	-135.9874556	216	Abundance	0	0	0	1	Good	LFT	2017-08-28	SO-2017.1	0
SO_C_20170728_A_0568.JPG	2017-07-28 15:04:19	58.48027778	-135.9882778	216	Abundance	0	0	0	1	Good	LFT	2017-08-28	SO-2017.1	0
SO_C_20170728_A_0569.JPG	2017-07-28 15:04:20	58.48025556	-135.9891	217	Abundance	0	0	0	1	Good	LFT	2017-08-28	SO-2017.1	0
SO_C_20170728_A_0570.JPG	2017-07-28 15:04:21	58.48023611	-135.9899222	218	Abundance	0	0	0	1	Good	LFT	2017-08-28	SO-2017.1	0
SO_C_20170728_A_0571.JPG	2017-07-28 15:04:22	58.48021944	-135.9907444	218	Abundance	0	0	0	1	Good	LFT	2017-08-28	SO-2017.1	0
SO_C_20170728_A_0572.JPG	2017-07-28 15:04:23	58.48021667	-135.9908611	218	Abundance	0	0	0	1	Good	LFT	2017-08-28	SO-2017.1	3
SO_C_20170728_A_0573.JPG	2017-07-28 15:04:24	58.48021389	-135.9909778	218	Abundance	0	0	0	1	Good	LFT	2017-08-28	SO-2017.1	3
SO_C_20170728_A_0574.JPG	2017-07-28 15:04:25	58.48021389	-135.9910944	218	Abundance	0	0	0	1	Good	LFT	2017-08-28	SO-2017.1	3
SO_C_20170728_A_0575.JPG	2017-07-28 15:04:26	58.48021111	-135.9912111	218	Abundance	0	0	0	1	Good	LFT	2017-08-28	SO-2017.1	3
SO_C_20170728_A_0576.JPG	2017-07-28 15:04:27	58.48020833	-135.9913278	218	Abundance	0	0	0	1	Good	LFT	2017-08-28	SO-2017.1	3
SO_C_20170728_A_0577.JPG	2017-07-28 15:04:28	58.48020833	-135.9914444	218	Abundance	0	0	0	1	Good	LFT	2017-08-28	SO-2017.1	3
SO_C_20170728_A_0578.JPG	2017-07-28 15:04:29	58.48020556	-135.9915611	218	Abundance	0	0	0	1	Good	LFT	2017-08-28	SO-2017.1	3
SO_C_20170728_A_0579.JPG	2017-07-28 15:04:30	58.48020278	-135.9916806	219	Abundance	0	0	0	1	Good	LFT	2017-08-28	SO-2017.1	3
SO_C_20170728_A_0580.JPG	2017-07-28 15:04:31	58.48020278	-135.9917972	219	Abundance	0	0	0	1	Good	LFT	2017-08-28	SO-2017.1	3
SO_C_20170728_A_0581.JPG	2017-07-28 15:04:32	58.4802	-135.9919139	219	Abundance	0	0	0	1	Good	LFT	2017-08-28	SO-2017.1	3
SO_C_20170728_A_0582.JPG	2017-07-28 15:04:33	58.48019722	-135.9920306	219	Abundance	0	0	1	1	Good	LFT	2017-08-28	SO-2017.1	3
SO_C_20170728_A_0583.JPG	2017-07-28 15:04:34	58.48019722	-135.9921472	219	Abundance	0	0	1	0	Good	LFT	2017-08-28	SO-2017.1	3
SO_C_20170728_A_0584.JPG	2017-07-28 15:04:35	58.48019444	-135.9922639	219	Abundance	0	0	1	0	Good	LFT	2017-08-28	SO-2017.1	3
SO_C_20170728_A_0585.JPG	2017-07-28 15:04:36	58.48019167	-135.9923806	219	Abundance	0	0	1	0	Good	LFT	2017-08-28	SO-2017.1	3
SO_C_20170728_A_0586.JPG	2017-07-28 15:04:37	58.48019167	-135.9924972	219	Abundance	0	0	0	0	Good	LFT	2017-08-28	SO-2017.1	3
SO_C_20170728_A_0587.JPG	2017-07-28 15:04:38	58.48018889	-135.9926139	219	Abundance	0	0	0	0	Good	LFT	2017-08-28	SO-2017.1	3
SO_C_20170728_A_0588.JPG	2017-07-28 15:04:39	58.48018611	-135.9927333	219	Abundance	0	0	1	0	Good	LFT	2017-08-28	SO-2017.1	3
SO_C_20170728_A_0589.JPG	2017-07-28 15:04:40	58.48018611	-135.99285	219	Abundance	0	0	0	0	Good	LFT	2017-08-28	SO-2017.1	3
SO_C_20170728_A_0590.JPG	2017-07-28 15:04:41	58.48018333	-135.9929667	219	Abundance	0	0	1	0	Good	LFT	2017-08-28	SO-2017.1	3
SO_C_20170728_A_0591.JPG	2017-07-28 15:04:42	58.48018056	-135.9930833	219	Abundance	0	0	1	0	Good	LFT	2017-08-28	SO-2017.1	3
SO_C_20170728_A_0592.JPG	2017-07-28 15:04:43	58.48001667	-136.0082417	219	Abundance	0	0	0	0	Good	LFT	2017-08-28	SO-2017.1	0
SO_C_20170728_A_0593.JPG	2017-07-28 15:04:44	58.48000556	-136.0090889	219	Abundance	0	0	0	0	Good	LFT	2017-08-28	SO-2017.1	0
SO_C_20170728_A_0594.JPG	2017-07-28 15:04:45	58.47999444	-136.0099361	219	Abundance	0	0	0	0	Good	LFT	2017-08-28	SO-2017.1	0
SO_C_20170728_A_0595.JPG	2017-07-28 15:04:46	58.47998611	-136.0107861	219	Abundance	0	0	1	0	Good	LFT	2017-08-28	SO-2017.1	0
SO_C_20170728_A_0596.JPG	2017-07-28 15:04:47	58.47997778	-136.0116361	218	Abundance	0	0	1	0	Good	LFT	2017-08-28	SO-2017.1	0
SO_C_20170728_A_0597.JPG	2017-07-28 15:04:48	58.47996944	-136.0124861	218	Abundance	0	0	1	0	Good	LFT	2017-08-28	SO-2017.1	0
SO_C_20170728_A_0598.JPG	2017-07-28 15:04:49	58.47996111	-136.0133361	218	Abundance	0	0	1	0	Good	LFT	2017-08-28	SO-2017.1	0
SO_C_20170728_A_0599.JPG	2017-07-28 15:04:50	58.47995278	-136.0141861	218	Abundance	0	0	1	0	Good	LFT	2017-08-28	SO-2017.1	0
SO_C_20170728_A_0600.JPG	2017-07-28 15:04:51	58.47994444	-136.0150333	218	Abundance	0	0	1	0	Good	LFT	2017-08-28	SO-2017.1	0
SO_C_20170728_A_0601.JPG	2017-07-28 15:04:52	58.47993611	-136.0158833	218	Abundance	0	0	1	0	Good	LFT	2017-08-29	SO-2017.1	0
SO_C_20170728_A_0602.JPG	2017-07-28 15:04:53	58.47992778	-136.0167306	218	Abundance	0	0	0	0	Good	LFT	2017-08-29	SO-2017.1	0
SO_C_20170728_A_0603.JPG	2017-07-28 15:04:54	58.47991944	-136.017575	217	Abundance	0	0	0	0	Good	LFT	2017-08-29	SO-2017.1	0
SO_C_20170728_A_0604.JPG	2017-07-28 15:04:55	58.47990833	-136.0184167	216	Abundance	0	0	1	0	Good	LFT	2017-08-29	SO-2017.1	0
SO_C_20170728_A_0605.JPG	2017-07-28 15:04:56	58.4799	-136.0192556	217	Abundance	0	0	0	0	Good	LFT	2017-08-29	SO-2017.1	0
SO_C_20170728_A_0606.JPG	2017-07-28 15:04:57	58.47989167	-136.0200889	217	Abundance	0	0	1	0	Good	LFT	2017-08-29	SO-2017.1	0
SO_C_20170728_A_0607.JPG	2017-07-28 15:04:58	58.47988333	-136.0209167	218	Abundance	0	0	1	0	Good	LFT	2017-08-29	SO-2017.1	0
SO_C_20170728_A_0608.JPG	2017-07-28 15:04:59	58.479875	-136.0217417	219	Abundance	0	0	1	0	Good	LFT	2017-08-29	SO-2017.1	0
SO_C_20170728_A_0609.JPG	2017-07-28 15:05:00	58.47986667	-136.0225639	219	Abundance	0	0	0	0	Good	LFT	2017-08-29	SO-2017.1	0
SO_C_20170728_A_0610.JPG	2017-07-28 15:05:01	58.47986111	-136.0233806	220	Abundance	0	0	0	0	Good	LFT	2017-08-29	SO-2017.1	0
SO_C_20170728_A_0611.JPG	2017-07-28 15:05:02	58.47985556	-136.0241972	221	Abundance	0	0	1	0	Good	LFT	2017-08-29	SO-2017.1	0
SO_C_20170728_A_0612.JPG	2017-07-28 15:05:03	58.47985278	-136.0250083	221	Abundance	0	0	1	0	Good	LFT	2017-08-29	SO-2017.1	0
SO_C_20170728_A_0613.JPG	2017-07-28 15:05:04	58.47985278	-136.0258194	221	Abundance	0	0	1	0	Good	LFT	2017-08-29	SO-2017.1	0
SO_C_20170728_A_0614.JPG	2017-07-28 15:05:05	58.47985278	-136.0266306	220	Abundance	0	0	0	0	Good	LFT	2017-08-29	SO-2017.1	0
SO_C_20170728_A_0615.JPG	2017-07-28 15:05:06	58.47985556	-136.0274417	220	Abundance	0	0	0	0	Good	LFT	2017-08-29	SO-2017.1	0
SO_C_20170728_A_0616.JPG	2017-07-28 15:05:07	58.47985833	-136.0282556	220	Abundance	0	0	0	0	Good	LFT	2017-08-29	SO-2017.1	0
SO_C_20170728_A_0617.JPG	2017-07-28 15:05:08	58.47985833	-136.0290694	219	Abundance	0	0	0	0	Good	LFT	2017-08-29	SO-2017.1	0
SO_C_20170728_A_0618.JPG	2017-07-28 15:05:09	58.47985833	-136.0298833	219	Abundance	0	0	0	0	Good	LFT	2017-08-29	SO-2017.1	0
SO_C_20170728_A_0619.JPG	2017-07-28 15:05:10	58.47985556	-136.0307	219	Abundance	0	0	0	0	Good	LFT	2017-08-29	SO-2017.1	0
SO_C_20170728_A_0620.JPG	2017-07-28 15:05:11	58.47985	-136.0315194	219	Abundance	0	0	0	0	Good	LFT	2017-08-29	SO-2017.1	0
SO_C_20170728_A_0621.JPG	2017-07-28 15:05:12	58.47983889	-136.0323389	219	Abundance	0	0	0	0	Good	LFT	2017-08-29	SO-2017.1	0
SO_C_20170728_A_0622.JPG	2017-07-28 15:05:13	58.47982778	-136.0331583	219	Abundance	0	0	0	0	Good	LFT	2017-08-29	SO-2017.1	0
SO_C_20170728_A_0623.JPG	2017-07-28 15:05:14	58.47981667	-136.0339806	219	Abundance	0	0	0	0	Good	LFT	2017-08-29	SO-2017.1	0
SO_C_20170728_A_0624.JPG	2017-07-28 15:05:15	58.4798	-136.0348028	219	Abundance	0	0	0	0	Good	LFT	2017-08-29	SO-2017.1	0
SO_C_20170728_A_0625.JPG	2017-07-28 15:05:16	58.47978611	-136.035625	219	Abundance	0	0	0	0	Good	LFT	2017-08-29	SO-2017.1	0
SO_C_20170728_A_0626.JPG	2017-07-28 15:05:17	58.47976667	-136.0364472	220	Abundance	0	0	0	0	Good	LFT	2017-08-29	SO-2017.1	0
SO_C_20170728_A_0627.JPG	2017-07-28 15:05:18	58.47974444	-136.0372694	220	Abundance	0	0	1	0	Good	LFT	2017-08-29	SO-2017.1	0
SO_C_20170728_A_0628.JPG	2017-07-28 15:05:19	58.47971944	-136.0380889	219	Abundance	0	0	1	0	Good	LFT	2017-08-29	SO-2017.1	0
SO_C_20170728_A_0629.JPG	2017-07-28 15:05:20	58.47969167	-136.0389139	220	Abundance	0	0	1	0	Good	LFT	2017-08-29	SO-2017.1	0
SO_C_20170728_A_0630.JPG	2017-07-28 15:05:21	58.47966667	-136.0397389	220	Abundance	0	0	1	0	Good	LFT	2017-08-29	SO-2017.1	0
SO_C_20170728_A_0631.JPG	2017-07-28 15:05:22	58.47964167	-136.0405639	220	Abundance	0	0	0	0	Good	LFT	2017-08-29	SO-2017.1	0
SO_C_20170728_A_0632.JPG	2017-07-28 15:05:23	58.47961667	-136.0413889	219	Abundance	0	0	0	0	Good	LFT	2017-08-29	SO-2017.1	0
SO_C_20170728_A_0633.JPG	2017-07-28 15:05:24	58.47959167	-136.0422167	219	Abundance	0	0	0	0	Good	LFT	2017-08-29	SO-2017.1	0
SO_C_20170728_A_0634.JPG	2017-07-28 15:05:25	58.47956944	-136.0430472	219	Abundance	0	0	0	0	Good	LFT	2017-08-29	SO-2017.1	0
SO_C_20170728_A_0635.JPG	2017-07-28 15:05:26	58.47955	-136.043875	219	Abundance	0	0	1	0	Good	LFT	2017-08-29	SO-2017.1	0
SO_C_20170728_A_0636.JPG	2017-07-28 15:05:27	58.47953056	-136.0447056	220	Abundance	0	0	1	0	Good	LFT	2017-08-29	SO-2017.1	0
SO_C_20170728_A_0637.JPG	2017-07-28 15:05:28	58.47951667	-136.0455361	220	Abundance	0	0	1	0	Good	LFT	2017-08-29	SO-2017.1	0
SO_C_20170728_A_0638.JPG	2017-07-28 15:05:29	58.47950278	-136.0463667	220	Abundance	0	0	0	0	Good	LFT	2017-08-29	SO-2017.1	0
SO_C_20170728_A_0639.JPG	2017-07-28 15:05:30	58.47949444	-136.0471972	219	Abundance	0	0	0	0	Good	LFT	2017-08-29	SO-2017.1	0
SO_C_20170728_A_0640.JPG	2017-07-28 15:05:31	58.47948611	-136.0480278	220	Abundance	0	0	0	0	Good	LFT	2017-08-29	SO-2017.1	0
SO_C_20170728_A_0641.JPG	2017-07-28 15:05:32	58.47948333	-136.0488583	220	Abundance	0	0	0	0	Good	LFT	2017-08-29	SO-2017.1	0
SO_C_20170728_A_0642.JPG	2017-07-28 15:05:33	58.47948333	-136.0496889	220	Abundance	0	0	0	0	Good	LFT	2017-08-29	SO-2017.1	0
SO_C_20170728_A_0643.JPG	2017-07-28 15:05:34	58.47948333	-136.0505194	220	Abundance	0	0	0	0	Good	LFT	2017-08-29	SO-2017.1	0
SO_C_20170728_A_0644.JPG	2017-07-28 15:05:35	58.47948889	-136.05135	221	Abundance	0	0	0	0	Good	LFT	2017-08-29	SO-2017.1	0
SO_C_20170728_A_0645.JPG	2017-07-28 15:05:36	58.47949167	-136.0521778	221	Abundance	0	0	1	0	Good	LFT	2017-08-29	SO-2017.1	0
SO_C_20170728_A_0646.JPG	2017-07-28 15:05:37	58.4795	-136.0530083	221	Abundance	0	0	1	0	Good	LFT	2017-08-29	SO-2017.1	0
SO_C_20170728_A_0647.JPG	2017-07-28 15:05:38	58.47950556	-136.0538389	220	Abundance	0	0	0	0	Good	LFT	2017-08-29	SO-2017.1	0
SO_C_20170728_A_0648.JPG	2017-07-28 15:05:39	58.47951389	-136.0546722	220	Abundance	0	0	0	0	Good	LFT	2017-08-29	SO-2017.1	0
SO_C_20170728_A_0649.JPG	2017-07-28 15:05:40	58.47952222	-136.0555056	220	Abundance	0	0	0	0	Good	LFT	2017-08-29	SO-2017.1	0
SO_C_20170728_A_0650.JPG	2017-07-28 15:05:41	58.47952778	-136.0563417	220	Abundance	0	0	0	0	Good	LFT	2017-08-29	SO-2017.1	0
SO_C_20170728_A_0651.JPG	2017-07-28 15:05:42	58.47953056	-136.0571806	219	Abundance	0	0	0	0	Good	LFT	2017-08-29	SO-2017.1	0
SO_C_20170728_A_0652.JPG	2017-07-28 15:05:43	58.47953333	-136.0580167	219	Abundance	0	0	0	0	Good	LFT	2017-08-29	SO-2017.1	0
SO_C_20170728_A_0653.JPG	2017-07-28 15:05:44	58.47953333	-136.0588583	219	Abundance	0	0	0	0	Good	LFT	2017-08-29	SO-2017.1	0
SO_C_20170728_A_0654.JPG	2017-07-28 15:05:45	58.47953333	-136.0596972	219	Abundance	0	0	0	0	Good	LFT	2017-08-29	SO-2017.1	0
SO_C_20170728_A_0655.JPG	2017-07-28 15:05:46	58.47953056	-136.0605389	218	Abundance	0	0	0	0	Good	LFT	2017-08-29	SO-2017.1	0
SO_C_20170728_A_0656.JPG	2017-07-28 15:05:47	58.47952778	-136.0613806	218	Abundance	0	0	0	0	Good	LFT	2017-08-29	SO-2017.1	0
SO_C_20170728_A_0657.JPG	2017-07-28 15:05:48	58.479525	-136.0622194	218	Abundance	0	0	1	0	Good	LFT	2017-08-29	SO-2017.1	0
SO_C_20170728_A_0658.JPG	2017-07-28 15:05:49	58.47951944	-136.0630583	218	Abundance	0	0	1	0	Good	LFT	2017-08-29	SO-2017.1	0
SO_C_20170728_A_0659.JPG	2017-07-28 15:05:50	58.47951111	-136.0638944	219	Abundance	0	0	0	0	Good	LFT	2017-08-29	SO-2017.1	0
SO_C_20170728_A_0660.JPG	2017-07-28 15:05:51	58.47950278	-136.0647278	220	Abundance	0	0	0	0	Good	LFT	2017-08-29	SO-2017.1	0
SO_C_20170728_A_0661.JPG	2017-07-28 15:05:52	58.47949444	-136.0655611	220	Abundance	0	0	1	0	Good	LFT	2017-08-29	SO-2017.1	0
SO_C_20170728_A_0662.JPG	2017-07-28 15:05:53	58.47948333	-136.0663889	221	Abundance	0	0	1	0	Good	LFT	2017-08-29	SO-2017.1	0
SO_C_20170728_A_0663.JPG	2017-07-28 15:05:54	58.479475	-136.0672167	222	Abundance	0	0	1	0	Good	LFT	2017-08-29	SO-2017.1	0
SO_C_20170728_A_0664.JPG	2017-07-28 15:05:55	58.47946667	-136.0680389	222	Abundance	0	0	0	0	Good	LFT	2017-08-29	SO-2017.1	0
SO_C_20170728_A_0665.JPG	2017-07-28 15:05:56	58.47945556	-136.0688583	223	Abundance	0	0	0	0	Good	LFT	2017-08-29	SO-2017.1	0
SO_C_20170728_A_0666.JPG	2017-07-28 15:05:57	58.47944722	-136.0696778	223	Abundance	0	0	1	0	Good	LFT	2017-08-29	SO-2017.1	0
SO_C_20170728_A_0667.JPG	2017-07-28 15:05:58	58.47944167	-136.0704972	222	Abundance	0	0	1	0	Good	LFT	2017-08-29	SO-2017.1	0
SO_C_20170728_A_0668.JPG	2017-07-28 15:05:59	58.47943333	-136.0713167	222	Abundance	0	0	0	0	Good	LFT	2017-08-29	SO-2017.1	0
SO_C_20170728_A_0669.JPG	2017-07-28 15:06:00	58.47942778	-136.0721361	222	Abundance	0	0	0	0	Good	LFT	2017-08-29	SO-2017.1	0
SO_C_20170728_A_0670.JPG	2017-07-28 15:06:01	58.47942222	-136.0729611	221	Abundance	0	0	0	0	Good	LFT	2017-08-29	SO-2017.1	0
SO_C_20170728_A_0671.JPG	2017-07-28 15:06:02	58.47941667	-136.0737889	219	Abundance	0	0	0	0	Good	LFT	2017-08-29	SO-2017.1	0
SO_C_20170728_A_0672.JPG	2017-07-28 15:06:03	58.47941111	-136.0746194	218	Abundance	0	0	0	0	Good	LFT	2017-08-29	SO-2017.1	0
SO_C_20170728_A_0673.JPG	2017-07-28 15:06:04	58.47940833	-136.0754528	216	Abundance	0	0	0	0	Good	LFT	2017-08-29	SO-2017.1	0
SO_C_20170728_A_0674.JPG	2017-07-28 15:06:05	58.47940278	-136.0762889	215	Abundance	0	0	0	0	Good	LFT	2017-08-29	SO-2017.1	0
SO_C_20170728_A_0675.JPG	2017-07-28 15:06:06	58.47939722	-136.077125	214	Abundance	0	0	0	0	Good	LFT	2017-08-29	SO-2017.1	0
SO_C_20170728_A_0676.JPG	2017-07-28 15:06:07	58.47938889	-136.0779611	214	Abundance	0	0	0	0	Good	LFT	2017-08-29	SO-2017.1	0
SO_C_20170728_A_0677.JPG	2017-07-28 15:06:08	58.47937778	-136.0787944	214	Abundance	0	0	0	0	Good	LFT	2017-08-29	SO-2017.1	0
SO_C_20170728_A_0678.JPG	2017-07-28 15:06:09	58.47936667	-136.0796222	214	Abundance	0	0	0	0	Good	LFT	2017-08-29	SO-2017.1	0
SO_C_20170728_A_0679.JPG	2017-07-28 15:06:10	58.47935556	-136.0804472	215	Abundance	0	0	0	0	Good	LFT	2017-08-29	SO-2017.1	0
SO_C_20170728_A_0680.JPG	2017-07-28 15:06:11	58.47934444	-136.0812667	216	Abundance	0	0	0	0	Good	LFT	2017-08-29	SO-2017.1	0
SO_C_20170728_A_0681.JPG	2017-07-28 15:06:12	58.47933056	-136.0820833	216	Abundance	0	0	0	0	Good	LFT	2017-08-29	SO-2017.1	0
SO_C_20170728_A_0682.JPG	2017-07-28 15:06:13	58.47931944	-136.0828944	218	Abundance	0	0	1	0	Good	LFT	2017-08-29	SO-2017.1	0
SO_C_20170728_A_0685.JPG	2017-07-28 15:06:16	58.47929444	-136.0853111	221	Abundance	0	0	1	0	Good	LFT	2017-08-29	SO-2017.1	0
SO_C_20170728_A_0686.JPG	2017-07-28 15:06:17	58.47928611	-136.0861167	221	Abundance	0	0	1	0	Good	LFT	2017-08-29	SO-2017.1	0
SO_C_20170728_A_0687.JPG	2017-07-28 15:06:18	58.47928333	-136.0869222	220	Abundance	0	0	0	0	Good	LFT	2017-08-29	SO-2017.1	0
SO_C_20170728_A_0688.JPG	2017-07-28 15:06:19	58.47928056	-136.0877306	220	Abundance	0	0	1	0	Good	LFT	2017-08-29	SO-2017.1	0
SO_C_20170728_A_0689.JPG	2017-07-28 15:06:20	58.47927778	-136.0885417	219	Abundance	0	0	0	1	Good	LFT	2017-08-29	SO-2017.1	0
SO_C_20170728_A_0690.JPG	2017-07-28 15:06:21	58.47928056	-136.0893556	219	Abundance	0	0	0	1	Good	LFT	2017-08-29	SO-2017.1	0
SO_C_20170728_A_0691.JPG	2017-07-28 15:06:22	58.47928333	-136.0901694	219	Abundance	0	0	0	1	Good	LFT	2017-08-29	SO-2017.1	0
SO_C_20170728_A_0692.JPG	2017-07-28 15:06:23	58.47928333	-136.0909833	218	Abundance	0	0	0	1	Good	LFT	2017-08-29	SO-2017.1	0
SO_C_20170728_A_0693.JPG	2017-07-28 15:06:24	58.47928333	-136.0918	218	Abundance	0	0	0	1	Good	LFT	2017-08-29	SO-2017.1	0
SO_C_20170728_A_0694.JPG	2017-07-28 15:06:30	58.47925	-136.0967028	218	Abundance	0	0	1	1	Good	LFT	2017-08-29	SO-2017.1	0
SO_C_20170728_A_0695.JPG	2017-07-28 15:06:31	58.47923889	-136.0975167	218	Abundance	0	0	1	1	Good	LFT	2017-08-29	SO-2017.1	0
SO_C_20170728_A_0696.JPG	2017-07-28 15:06:32	58.479225	-136.0983306	219	Abundance	0	0	0	1	Good	LFT	2017-08-29	SO-2017.1	0
SO_C_20170728_A_0697.JPG	2017-07-28 15:06:33	58.47921111	-136.0991417	219	Abundance	0	0	0	1	Good	LFT	2017-08-29	SO-2017.1	0
SO_C_20170728_A_0698.JPG	2017-07-28 15:06:34	58.47919722	-136.09995	220	Abundance	0	0	0	1	Good	LFT	2017-08-29	SO-2017.1	0
SO_C_20170728_A_0699.JPG	2017-07-28 15:06:35	58.47917778	-136.1007583	221	Abundance	0	0	0	1	Good	LFT	2017-08-29	SO-2017.1	0
SO_C_20170728_A_0700.JPG	2017-07-28 15:06:36	58.47915556	-136.1015611	221	Abundance	0	0	0	1	Good	LFT	2017-08-29	SO-2017.1	0
SO_C_20170728_A_0701.JPG	2017-07-28 15:06:37	58.47913333	-136.1023611	222	Abundance	0	0	0	1	Good	LFT	2017-08-29	SO-2017.1	0
SO_C_20170728_A_0702.JPG	2017-07-28 15:06:38	58.47910556	-136.1031583	223	Abundance	0	0	0	1	Good	LFT	2017-08-29	SO-2017.1	0
SO_C_20170728_A_0703.JPG	2017-07-28 15:06:39	58.47907778	-136.1039556	223	Abundance	0	0	0	1	Good	LFT	2017-08-29	SO-2017.1	0
SO_C_20170728_A_0704.JPG	2017-07-28 15:08:20	58.482425	-136.1021111	219	Abundance	0	0	0	1	Good	LFT	2017-08-29	SO-2017.1	0
SO_C_20170728_A_0705.JPG	2017-07-28 15:08:21	58.48245833	-136.1013	219	Abundance	0	0	0	1	Good	LFT	2017-08-29	SO-2017.1	0
SO_C_20170728_A_0706.JPG	2017-07-28 15:08:22	58.48249444	-136.1004889	219	Abundance	0	0	0	1	Good	LFT	2017-08-29	SO-2017.1	0
SO_C_20170728_A_0707.JPG	2017-07-28 15:08:23	58.48252778	-136.0996778	219	Abundance	0	0	0	1	Good	LFT	2017-08-29	SO-2017.1	0
SO_C_20170728_A_0708.JPG	2017-07-28 15:08:24	58.48256111	-136.0988667	219	Abundance	0	0	0	1	Good	LFT	2017-08-29	SO-2017.1	0
SO_C_20170728_A_0709.JPG	2017-07-28 15:08:25	58.48259167	-136.0980556	219	Abundance	0	0	1	0	Good	LFT	2017-08-29	SO-2017.1	0
SO_C_20170728_A_0710.JPG	2017-07-28 15:08:26	58.48262222	-136.0972417	219	Abundance	0	0	1	0	Good	LFT	2017-08-29	SO-2017.1	0
SO_C_20170728_A_0711.JPG	2017-07-28 15:08:27	58.48265278	-136.0964278	219	Abundance	0	0	1	0	Good	LFT	2017-08-29	SO-2017.1	0
SO_C_20170728_A_0712.JPG	2017-07-28 15:08:28	58.48268056	-136.0956111	219	Abundance	0	0	1	1	Good	LFT	2017-08-29	SO-2017.1	0
SO_C_20170728_A_0713.JPG	2017-07-28 15:08:29	58.48270833	-136.0947944	220	Abundance	0	0	1	1	Good	LFT	2017-08-29	SO-2017.1	0
SO_C_20170728_A_0714.JPG	2017-07-28 15:08:30	58.48273056	-136.0939806	220	Abundance	0	0	1	1	Good	LFT	2017-08-29	SO-2017.1	0
SO_C_20170728_A_0715.JPG	2017-07-28 15:08:31	58.48275278	-136.0931611	220	Abundance	0	0	1	1	Good	LFT	2017-08-29	SO-2017.1	0
SO_C_20170728_A_0716.JPG	2017-07-28 15:08:32	58.48277222	-136.0923444	220	Abundance	0	0	1	1	Good	LFT	2017-08-29	SO-2017.1	0
SO_C_20170728_A_0717.JPG	2017-07-28 15:08:33	58.48278889	-136.0915278	220	Abundance	0	0	1	1	Good	LFT	2017-08-29	SO-2017.1	0
SO_C_20170728_A_0718.JPG	2017-07-28 15:08:34	58.48280556	-136.0907083	221	Abundance	0	0	1	0	Good	LFT	2017-08-29	SO-2017.1	0
SO_C_20170728_A_0719.JPG	2017-07-28 15:08:35	58.48281944	-136.0898944	222	Abundance	0	0	1	0	Good	LFT	2017-08-29	SO-2017.1	0
SO_C_20170728_A_0720.JPG	2017-07-28 15:08:36	58.48283056	-136.0890778	222	Abundance	0	0	0	0	Good	LFT	2017-08-29	SO-2017.1	0
SO_C_20170728_A_0722.JPG	2017-07-28 15:08:38	58.48285833	-136.0874528	224	Abundance	0	0	1	0	Good	LFT	2017-08-29	SO-2017.1	0
SO_C_20170728_A_0723.JPG	2017-07-28 15:08:39	58.48286944	-136.0866389	225	Abundance	0	0	0	0	Good	LFT	2017-08-29	SO-2017.1	0
SO_C_20170728_A_0724.JPG	2017-07-28 15:08:40	58.48288333	-136.085825	225	Abundance	0	0	0	0	Good	LFT	2017-08-29	SO-2017.1	0
SO_C_20170728_A_0725.JPG	2017-07-28 15:08:41	58.48289444	-136.0850083	224	Abundance	0	0	0	0	Good	LFT	2017-08-29	SO-2017.1	0
SO_C_20170728_A_0726.JPG	2017-07-28 15:08:42	58.48290278	-136.0841861	223	Abundance	0	0	0	0	Good	LFT	2017-08-29	SO-2017.1	0
SO_C_20170728_A_0727.JPG	2017-07-28 15:08:43	58.48291111	-136.0833639	223	Abundance	0	0	0	0	Good	LFT	2017-08-29	SO-2017.1	0
SO_C_20170728_A_0728.JPG	2017-07-28 15:08:44	58.48291944	-136.0825389	223	Abundance	0	0	0	0	Good	LFT	2017-08-29	SO-2017.1	0
SO_C_20170728_A_0729.JPG	2017-07-28 15:08:45	58.48292778	-136.0817111	222	Abundance	0	0	0	0	Good	LFT	2017-08-29	SO-2017.1	0
SO_C_20170728_A_0730.JPG	2017-07-28 15:08:46	58.48293333	-136.0808778	221	Abundance	0	0	0	0	Good	LFT	2017-08-29	SO-2017.1	0
SO_C_20170728_A_0731.JPG	2017-07-28 15:08:47	58.48293889	-136.0800472	220	Abundance	0	0	0	0	Good	LFT	2017-08-29	SO-2017.1	0
SO_C_20170728_A_0732.JPG	2017-07-28 15:08:48	58.48294167	-136.0792111	220	Abundance	0	0	0	0	Good	LFT	2017-08-29	SO-2017.1	0
SO_C_20170728_A_0735.JPG	2017-07-28 15:08:51	58.48295	-136.0767028	220	Abundance	0	0	0	0	Good	LFT	2017-08-29	SO-2017.1	0
SO_C_20170728_A_0736.JPG	2017-07-28 15:08:52	58.48295	-136.0758667	220	Abundance	0	0	0	0	Good	LFT	2017-08-29	SO-2017.1	0
SO_C_20170728_A_0737.JPG	2017-07-28 15:08:53	58.48295278	-136.0750278	220	Abundance	0	0	0	0	Good	LFT	2017-08-29	SO-2017.1	0
SO_C_20170728_A_0738.JPG	2017-07-28 15:08:54	58.48295278	-136.0741889	220	Abundance	0	0	1	0	Good	LFT	2017-08-29	SO-2017.1	0
SO_C_20170728_A_0739.JPG	2017-07-28 15:08:55	58.48295556	-136.07335	220	Abundance	0	0	1	0	Good	LFT	2017-08-29	SO-2017.1	0
SO_C_20170728_A_0740.JPG	2017-07-28 15:08:56	58.48295833	-136.0725111	219	Abundance	0	0	0	0	Good	LFT	2017-08-29	SO-2017.1	0
SO_C_20170728_A_0741.JPG	2017-07-28 15:08:57	58.48296389	-136.0716722	219	Abundance	0	0	0	0	Good	LFT	2017-08-29	SO-2017.1	0
SO_C_20170728_A_0742.JPG	2017-07-28 15:08:58	58.48297222	-136.0708361	219	Abundance	0	0	0	0	Good	LFT	2017-08-29	SO-2017.1	0
SO_C_20170728_A_0743.JPG	2017-07-28 15:08:59	58.48298056	-136.0699972	219	Abundance	0	0	0	0	Good	LFT	2017-08-29	SO-2017.1	0
SO_C_20170728_A_0744.JPG	2017-07-28 15:09:00	58.48299167	-136.0691583	220	Abundance	0	0	1	0	Good	LFT	2017-08-29	SO-2017.1	0
SO_C_20170728_A_0745.JPG	2017-07-28 15:09:01	58.48300278	-136.0683194	219	Abundance	0	0	0	0	Good	LFT	2017-08-29	SO-2017.1	0
SO_C_20170728_A_0746.JPG	2017-07-28 15:09:02	58.48301389	-136.0674833	219	Abundance	0	0	0	0	Good	LFT	2017-08-29	SO-2017.1	0
SO_C_20170728_A_0747.JPG	2017-07-28 15:09:03	58.483025	-136.06665	220	Abundance	0	0	0	0	Good	LFT	2017-08-29	SO-2017.1	0
SO_C_20170728_A_0748.JPG	2017-07-28 15:09:04	58.48303611	-136.0658167	220	Abundance	0	0	0	0	Good	LFT	2017-08-29	SO-2017.1	0
SO_C_20170728_A_0749.JPG	2017-07-28 15:09:05	58.48305	-136.0649861	222	Abundance	0	0	1	0	Good	LFT	2017-08-29	SO-2017.1	0
SO_C_20170728_A_0750.JPG	2017-07-28 15:09:06	58.48306111	-136.0641583	222	Abundance	0	0	1	0	Good	LFT	2017-08-29	SO-2017.1	0
SO_C_20170728_A_0751.JPG	2017-07-28 15:09:07	58.48307222	-136.0633333	224	Abundance	0	0	1	0	Good	LFT	2017-08-29	SO-2017.1	0
SO_C_20170728_A_0752.JPG	2017-07-28 15:09:08	58.48308611	-136.0625111	225	Abundance	0	0	0	0	Good	LFT	2017-08-29	SO-2017.1	0
SO_C_20170728_A_0753.JPG	2017-07-28 15:09:09	58.4831	-136.0616917	226	Abundance	0	0	0	0	Good	LFT	2017-08-29	SO-2017.1	0
SO_C_20170728_A_0754.JPG	2017-07-28 15:09:10	58.48311667	-136.060875	226	Abundance	0	0	0	0	Good	LFT	2017-08-29	SO-2017.1	0
SO_C_20170728_A_0755.JPG	2017-07-28 15:09:11	58.48313056	-136.0600583	227	Abundance	0	0	0	0	Good	LFT	2017-08-29	SO-2017.1	0
SO_C_20170728_A_0756.JPG	2017-07-28 15:09:12	58.48315	-136.0592417	227	Abundance	0	0	0	0	Good	LFT	2017-08-29	SO-2017.1	0
SO_C_20170728_A_0757.JPG	2017-07-28 15:09:13	58.48316944	-136.058425	227	Abundance	0	0	0	0	Good	LFT	2017-08-29	SO-2017.1	0
SO_C_20170728_A_0758.JPG	2017-07-28 15:09:14	58.48318889	-136.0576056	227	Abundance	0	0	0	0	Good	LFT	2017-08-29	SO-2017.1	0
SO_C_20170728_A_0759.JPG	2017-07-28 15:09:15	58.48320556	-136.0567833	226	Abundance	0	0	0	0	Good	LFT	2017-08-29	SO-2017.1	0
SO_C_20170728_A_0760.JPG	2017-07-28 15:09:16	58.48321944	-136.0559583	226	Abundance	0	0	1	0	Good	LFT	2017-08-29	SO-2017.1	0
SO_C_20170728_A_0761.JPG	2017-07-28 15:09:17	58.48323056	-136.0551278	225	Abundance	0	0	1	0	Good	LFT	2017-08-29	SO-2017.1	0
SO_C_20170728_A_0762.JPG	2017-07-28 15:09:18	58.48323889	-136.0542944	224	Abundance	0	0	1	0	Good	LFT	2017-08-29	SO-2017.1	0
SO_C_20170728_A_0763.JPG	2017-07-28 15:09:19	58.48324444	-136.0534583	224	Abundance	0	0	0	0	Good	LFT	2017-08-29	SO-2017.1	0
SO_C_20170728_A_0764.JPG	2017-07-28 15:09:20	58.48324722	-136.0526194	223	Abundance	0	0	0	0	Good	LFT	2017-08-29	SO-2017.1	0
SO_C_20170728_A_0765.JPG	2017-07-28 15:09:21	58.48325	-136.0517778	223	Abundance	0	0	0	0	Good	LFT	2017-08-29	SO-2017.1	0
SO_C_20170728_A_0766.JPG	2017-07-28 15:09:22	58.48325	-136.0509361	222	Abundance	0	0	1	0	Good	LFT	2017-08-29	SO-2017.1	0
SO_C_20170728_A_0767.JPG	2017-07-28 15:09:23	58.48324444	-136.0500917	222	Abundance	0	0	0	0	Good	LFT	2017-08-29	SO-2017.1	0
SO_C_20170728_A_0768.JPG	2017-07-28 15:09:24	58.48323889	-136.0492472	221	Abundance	0	0	1	0	Good	LFT	2017-08-29	SO-2017.1	0
SO_C_20170728_A_0769.JPG	2017-07-28 15:09:25	58.48322778	-136.0484	221	Abundance	0	0	1	0	Good	LFT	2017-08-29	SO-2017.1	0
SO_C_20170728_A_0770.JPG	2017-07-28 15:09:26	58.48321389	-136.0475556	221	Abundance	0	0	0	0	Good	LFT	2017-08-29	SO-2017.1	0
SO_C_20170728_A_0771.JPG	2017-07-28 15:09:27	58.48319444	-136.0467111	220	Abundance	0	0	0	0	Good	LFT	2017-08-29	SO-2017.1	0
SO_C_20170728_A_0772.JPG	2017-07-28 15:09:28	58.483175	-136.0458667	220	Abundance	0	0	0	0	Good	LFT	2017-08-29	SO-2017.1	0
SO_C_20170728_A_0773.JPG	2017-07-28 15:09:29	58.48315556	-136.0450222	221	Abundance	0	0	1	0	Good	LFT	2017-08-29	SO-2017.1	0
SO_C_20170728_A_0774.JPG	2017-07-28 15:09:30	58.48313611	-136.0441806	221	Abundance	0	0	0	0	Good	LFT	2017-08-29	SO-2017.1	0
SO_C_20170728_A_0775.JPG	2017-07-28 15:09:31	58.48311667	-136.0433417	222	Abundance	0	0	1	0	Good	LFT	2017-08-29	SO-2017.1	0
SO_C_20170728_A_0776.JPG	2017-07-28 15:09:32	58.4831	-136.0425056	222	Abundance	0	0	1	0	Good	LFT	2017-08-29	SO-2017.1	0
SO_C_20170728_A_0777.JPG	2017-07-28 15:09:33	58.48308611	-136.0416694	223	Abundance	0	0	1	0	Good	LFT	2017-08-29	SO-2017.1	0
SO_C_20170728_A_0778.JPG	2017-07-28 15:09:34	58.483075	-136.0408389	224	Abundance	0	0	1	0	Good	LFT	2017-08-29	SO-2017.1	0
SO_C_20170728_A_0779.JPG	2017-07-28 15:09:35	58.48306944	-136.0400111	225	Abundance	0	0	0	0	Good	LFT	2017-08-29	SO-2017.1	0
SO_C_20170728_A_0780.JPG	2017-07-28 15:09:36	58.48306667	-136.0391861	225	Abundance	0	0	0	0	Good	LFT	2017-08-29	SO-2017.1	0
SO_C_20170728_A_0781.JPG	2017-07-28 15:09:37	58.48306944	-136.0383667	226	Abundance	0	0	0	0	Good	LFT	2017-08-29	SO-2017.1	0
SO_C_20170728_A_0782.JPG	2017-07-28 15:09:38	58.48307778	-136.0375472	227	Abundance	0	0	0	0	Good	LFT	2017-08-29	SO-2017.1	0
SO_C_20170728_A_0783.JPG	2017-07-28 15:09:39	58.48308889	-136.0367306	227	Abundance	0	0	0	0	Good	LFT	2017-08-29	SO-2017.1	0
SO_C_20170728_A_0784.JPG	2017-07-28 15:09:40	58.48310556	-136.0359139	227	Abundance	0	0	0	0	Good	LFT	2017-08-29	SO-2017.1	0
SO_C_20170728_A_0785.JPG	2017-07-28 15:09:41	58.483125	-136.0350944	227	Abundance	0	0	0	0	Good	LFT	2017-08-29	SO-2017.1	0
SO_C_20170728_A_0786.JPG	2017-07-28 15:09:42	58.48314722	-136.0342778	226	Abundance	0	0	0	0	Good	LFT	2017-08-29	SO-2017.1	0
SO_C_20170728_A_0787.JPG	2017-07-28 15:09:43	58.48316944	-136.0334556	226	Abundance	0	0	1	0	Good	LFT	2017-08-29	SO-2017.1	0
SO_C_20170728_A_0788.JPG	2017-07-28 15:09:44	58.48319167	-136.0326278	225	Abundance	0	0	0	0	Good	LFT	2017-08-29	SO-2017.1	0
SO_C_20170728_A_0789.JPG	2017-07-28 15:09:45	58.48321111	-136.0318	225	Abundance	0	0	0	0	Good	LFT	2017-08-29	SO-2017.1	0
SO_C_20170728_A_0791.JPG	2017-07-28 15:09:47	58.48324722	-136.0301333	223	Abundance	0	0	0	0	Good	LFT	2017-08-29	SO-2017.1	0
SO_C_20170728_A_0792.JPG	2017-07-28 15:09:48	58.48326111	-136.0292944	222	Abundance	0	0	1	0	Good	LFT	2017-08-29	SO-2017.1	0
SO_C_20170728_A_0793.JPG	2017-07-28 15:09:49	58.48327222	-136.0284528	221	Abundance	0	0	0	0	Good	LFT	2017-08-29	SO-2017.1	0
SO_C_20170728_A_0794.JPG	2017-07-28 15:09:50	58.48328056	-136.0276111	220	Abundance	0	0	1	0	Good	LFT	2017-08-29	SO-2017.1	0
SO_C_20170728_A_0795.JPG	2017-07-28 15:09:51	58.48328889	-136.0267694	220	Abundance	0	0	0	0	Good	LFT	2017-08-29	SO-2017.1	0
SO_C_20170728_A_0796.JPG	2017-07-28 15:09:52	58.48329444	-136.0259306	220	Abundance	0	0	1	0	Good	LFT	2017-08-29	SO-2017.1	0
SO_C_20170728_A_0797.JPG	2017-07-28 15:09:53	58.4833	-136.0250917	222	Abundance	0	0	1	0	Good	LFT	2017-08-29	SO-2017.1	0
SO_C_20170728_A_0798.JPG	2017-07-28 15:09:54	58.4833	-136.0242556	222	Abundance	0	0	1	0	Good	LFT	2017-08-29	SO-2017.1	0
SO_C_20170728_A_0799.JPG	2017-07-28 15:09:55	58.4833	-136.023425	223	Abundance	0	0	1	0	Good	LFT	2017-08-29	SO-2017.1	0
SO_C_20170728_A_0800.JPG	2017-07-28 15:09:56	58.4833	-136.0225917	224	Abundance	0	0	1	0	Good	LFT	2017-08-29	SO-2017.1	0
SO_C_20170728_A_0801.JPG	2017-07-28 15:09:57	58.48330278	-136.0217639	224	Abundance	0	0	1	0	Good	LFT	2017-08-29	SO-2017.1	0
SO_C_20170728_A_0802.JPG	2017-07-28 15:09:58	58.48330556	-136.0209361	224	Abundance	0	0	1	0	Good	LFT	2017-08-29	SO-2017.1	0
SO_C_20170728_A_0803.JPG	2017-07-28 15:09:59	58.48331111	-136.0201111	225	Abundance	0	0	0	0	Good	LFT	2017-08-29	SO-2017.1	0
SO_C_20170728_A_0804.JPG	2017-07-28 15:10:00	58.48331389	-136.0192889	225	Abundance	0	0	0	0	Good	LFT	2017-08-29	SO-2017.1	0
SO_C_20170728_A_0805.JPG	2017-07-28 15:10:01	58.48332222	-136.0184667	225	Abundance	0	0	0	0	Good	LFT	2017-08-29	SO-2017.1	0
SO_C_20170728_A_0806.JPG	2017-07-28 15:10:02	58.48333056	-136.0176472	226	Abundance	0	0	1	0	Good	LFT	2017-08-29	SO-2017.1	0
SO_C_20170728_A_0807.JPG	2017-07-28 15:10:03	58.48334167	-136.0168306	226	Abundance	0	0	1	0	Good	LFT	2017-08-29	SO-2017.1	0
SO_C_20170728_A_0808.JPG	2017-07-28 15:10:04	58.48335	-136.0160111	226	Abundance	0	0	1	0	Good	LFT	2017-08-29	SO-2017.1	0
SO_C_20170728_A_0809.JPG	2017-07-28 15:10:05	58.48335833	-136.0151917	227	Abundance	0	0	0	0	Good	LFT	2017-08-29	SO-2017.1	0
SO_C_20170728_A_0810.JPG	2017-07-28 15:10:06	58.48336667	-136.014375	227	Abundance	0	0	1	0	Good	LFT	2017-08-29	SO-2017.1	0
SO_C_20170728_A_0811.JPG	2017-07-28 15:10:07	58.483375	-136.0135583	227	Abundance	0	0	1	0	Good	LFT	2017-08-29	SO-2017.1	0
SO_C_20170728_A_0814.JPG	2017-07-28 15:10:10	58.48339167	-136.0111	227	Abundance	0	0	1	0	Good	LFT	2017-08-29	SO-2017.1	0
SO_C_20170728_A_0815.JPG	2017-07-28 15:10:11	58.48339722	-136.0102806	227	Abundance	0	0	0	0	Good	LFT	2017-08-29	SO-2017.1	0
SO_C_20170728_A_0816.JPG	2017-07-28 15:10:12	58.4834	-136.0094583	227	Abundance	0	0	1	0	Good	LFT	2017-08-29	SO-2017.1	0
SO_C_20170728_A_0817.JPG	2017-07-28 15:10:13	58.4834	-136.0086361	227	Abundance	0	0	1	0	Good	LFT	2017-08-29	SO-2017.1	0
SO_C_20170728_A_0818.JPG	2017-07-28 15:10:14	58.4834	-136.0078167	227	Abundance	0	0	1	0	Good	LFT	2017-08-29	SO-2017.1	0
SO_C_20170728_A_0819.JPG	2017-07-28 15:10:15	58.4834	-136.0069944	227	Abundance	0	0	0	0	Good	LFT	2017-08-29	SO-2017.1	0
SO_C_20170728_A_0820.JPG	2017-07-28 15:10:16	58.4834	-136.0061722	227	Abundance	0	0	0	0	Good	LFT	2017-08-29	SO-2017.1	0
SO_C_20170728_A_0821.JPG	2017-07-28 15:10:17	58.4834	-136.00535	227	Abundance	0	0	0	0	Good	LFT	2017-08-29	SO-2017.1	0
SO_C_20170728_A_0822.JPG	2017-07-28 15:10:18	58.4834	-136.0045278	227	Abundance	0	0	0	0	Good	LFT	2017-08-29	SO-2017.1	0
SO_C_20170728_A_0823.JPG	2017-07-28 15:10:19	58.4834	-136.0037028	228	Abundance	0	0	0	0	Good	LFT	2017-08-29	SO-2017.1	0
SO_C_20170728_A_0824.JPG	2017-07-28 15:10:20	58.48340278	-136.0028806	228	Abundance	0	0	0	0	Good	LFT	2017-08-29	SO-2017.1	0
SO_C_20170728_A_0825.JPG	2017-07-28 15:10:21	58.48340556	-136.0020556	228	Abundance	0	0	1	0	Good	LFT	2017-08-29	SO-2017.1	0
SO_C_20170728_A_0826.JPG	2017-07-28 15:10:22	58.48341111	-136.0012306	228	Abundance	0	0	1	0	Good	LFT	2017-08-29	SO-2017.1	0
SO_C_20170728_A_0827.JPG	2017-07-28 15:10:23	58.48341944	-136.0004	228	Abundance	0	0	1	0	Good	LFT	2017-08-29	SO-2017.1	0
SO_C_20170728_A_0828.JPG	2017-07-28 15:10:24	58.48342778	-135.9995694	227	Abundance	0	0	1	1	Good	LFT	2017-08-29	SO-2017.1	0
SO_C_20170728_A_0829.JPG	2017-07-28 15:10:25	58.48343611	-135.9987389	227	Abundance	0	0	1	1	Good	LFT	2017-08-29	SO-2017.1	0
SO_C_20170728_A_0830.JPG	2017-07-28 15:10:26	58.48344722	-135.9979056	227	Abundance	0	0	0	1	Good	LFT	2017-08-29	SO-2017.1	0
SO_C_20170728_A_0831.JPG	2017-07-28 15:10:27	58.48346111	-135.9970694	226	Abundance	0	0	0	1	Good	LFT	2017-08-29	SO-2017.1	0
SO_C_20170728_A_0832.JPG	2017-07-28 15:10:28	58.483475	-135.9962306	225	Abundance	0	0	0	1	Good	LFT	2017-08-29	SO-2017.1	0
SO_C_20170728_A_0833.JPG	2017-07-28 15:10:29	58.48348611	-135.9953889	224	Abundance	0	0	0	1	Good	LFT	2017-08-29	SO-2017.1	0
SO_C_20170728_A_0834.JPG	2017-07-28 15:10:30	58.48349722	-135.9945444	223	Abundance	0	0	0	1	Good	LFT	2017-08-29	SO-2017.1	0
SO_C_20170728_A_0835.JPG	2017-07-28 15:11:38	58.4924	-135.9650472	227	Abundance	0	0	0	1	Good	LFT	2017-08-29	SO-2017.1	0
SO_C_20170728_A_0836.JPG	2017-07-28 15:11:39	58.49241667	-135.9658944	226	Abundance	0	0	0	1	Good	LFT	2017-08-29	SO-2017.1	0
SO_C_20170728_A_0837.JPG	2017-07-28 15:11:40	58.49238889	-135.96675	227	Abundance	0	0	0	1	Good	LFT	2017-08-29	SO-2017.1	0
SO_C_20170728_A_0838.JPG	2017-07-28 15:11:41	58.49231944	-135.9676	227	Abundance	0	0	0	1	Good	LFT	2017-08-29	SO-2017.1	0
SO_C_20170728_A_0839.JPG	2017-07-28 15:11:42	58.49221389	-135.9684361	227	Abundance	0	0	0	1	Good	LFT	2017-08-29	SO-2017.1	0
SO_C_20170728_A_0840.JPG	2017-07-28 15:12:09	58.4864	-135.98875	223	Abundance	0	0	0	1	Good	LFT	2017-08-29	SO-2017.1	0
SO_C_20170728_A_0841.JPG	2017-07-28 15:12:10	58.48636111	-135.9896028	223	Abundance	0	0	0	1	Good	LFT	2017-08-29	SO-2017.1	0
SO_C_20170728_A_0842.JPG	2017-07-28 15:12:11	58.48634722	-135.9904583	223	Abundance	0	0	1	1	Good	LFT	2017-08-29	SO-2017.1	0
SO_C_20170728_A_0843.JPG	2017-07-28 15:12:12	58.48635556	-135.9913111	223	Abundance	0	0	1	1	Good	LFT	2017-08-29	SO-2017.1	0
SO_C_20170728_A_0844.JPG	2017-07-28 15:12:13	58.48638889	-135.9921556	223	Abundance	0	0	0	0	Good	LFT	2017-08-29	SO-2017.1	0
SO_C_20170728_A_0845.JPG	2017-07-28 15:12:14	58.48644444	-135.9929972	223	Abundance	0	0	0	1	Good	LFT	2017-08-29	SO-2017.1	0
SO_C_20170728_A_0846.JPG	2017-07-28 15:12:15	58.48651944	-135.9938278	224	Abundance	0	0	1	0	Good	LFT	2017-08-29	SO-2017.1	0
SO_C_20170728_A_0847.JPG	2017-07-28 15:12:16	58.48661389	-135.99465	224	Abundance	0	0	1	0	Good	LFT	2017-08-29	SO-2017.1	0
SO_C_20170728_A_0848.JPG	2017-07-28 15:12:17	58.48671667	-135.9954639	225	Abundance	0	0	1	0	Good	LFT	2017-08-29	SO-2017.1	0
SO_C_20170728_A_0849.JPG	2017-07-28 15:12:18	58.48682222	-135.9962722	226	Abundance	0	0	1	0	Good	LFT	2017-08-29	SO-2017.1	0
SO_C_20170728_A_0850.JPG	2017-07-28 15:12:19	58.48693056	-135.9970806	227	Abundance	0	0	1	0	Good	LFT	2017-08-29	SO-2017.1	0
SO_C_20170728_A_0851.JPG	2017-07-28 15:12:20	58.48703333	-135.9978861	228	Abundance	0	0	1	0	Good	LFT	2017-08-29	SO-2017.1	0
SO_C_20170728_A_0852.JPG	2017-07-28 15:12:21	58.48713056	-135.9986944	229	Abundance	0	0	1	0	Good	LFT	2017-08-29	SO-2017.1	0
SO_C_20170728_A_0853.JPG	2017-07-28 15:12:22	58.48722222	-135.9995028	229	Abundance	0	0	1	0	Good	LFT	2017-08-29	SO-2017.1	0
SO_C_20170728_A_0854.JPG	2017-07-28 15:12:23	58.48730556	-136.0003111	230	Abundance	0	0	1	0	Good	LFT	2017-08-29	SO-2017.1	0
SO_C_20170728_A_0855.JPG	2017-07-28 15:12:24	58.487375	-136.001125	230	Abundance	0	0	1	0	Good	LFT	2017-08-29	SO-2017.1	0
SO_C_20170728_A_0856.JPG	2017-07-28 15:12:25	58.48743611	-136.0019389	231	Abundance	0	0	1	0	Good	LFT	2017-08-29	SO-2017.1	0
SO_C_20170728_A_0857.JPG	2017-07-28 15:12:26	58.48748333	-136.0027583	230	Abundance	0	0	0	0	Good	LFT	2017-08-29	SO-2017.1	0
SO_C_20170728_A_0858.JPG	2017-07-28 15:12:27	58.48751667	-136.0035806	230	Abundance	0	0	0	0	Good	LFT	2017-08-29	SO-2017.1	0
SO_C_20170728_A_0859.JPG	2017-07-28 15:12:28	58.48753611	-136.0044056	231	Abundance	0	0	0	0	Good	LFT	2017-08-29	SO-2017.1	0
SO_C_20170728_A_0860.JPG	2017-07-28 15:12:29	58.48753889	-136.0052306	230	Abundance	0	0	0	0	Good	LFT	2017-08-29	SO-2017.1	0
SO_C_20170728_A_0861.JPG	2017-07-28 15:12:30	58.48753056	-136.0060583	230	Abundance	0	0	0	0	Good	LFT	2017-08-29	SO-2017.1	0
SO_C_20170728_A_0862.JPG	2017-07-28 15:12:31	58.48750833	-136.0068889	230	Abundance	0	0	0	0	Good	LFT	2017-08-29	SO-2017.1	0
SO_C_20170728_A_0863.JPG	2017-07-28 15:12:32	58.48747778	-136.0077194	229	Abundance	0	0	0	0	Good	LFT	2017-08-29	SO-2017.1	0
SO_C_20170728_A_0864.JPG	2017-07-28 15:12:33	58.48743333	-136.00855	228	Abundance	0	0	0	0	Good	LFT	2017-08-29	SO-2017.1	0
SO_C_20170728_A_0865.JPG	2017-07-28 15:12:34	58.48738333	-136.0093833	227	Abundance	0	0	0	0	Good	LFT	2017-08-29	SO-2017.1	0
SO_C_20170728_A_0866.JPG	2017-07-28 15:12:35	58.48733056	-136.0102167	226	Abundance	0	0	0	0	Good	LFT	2017-08-29	SO-2017.1	0
SO_C_20170728_A_0867.JPG	2017-07-28 15:12:36	58.48727222	-136.0110528	225	Abundance	0	0	1	0	Good	LFT	2017-08-29	SO-2017.1	0
SO_C_20170728_A_0868.JPG	2017-07-28 15:12:37	58.48721389	-136.0118889	224	Abundance	0	0	0	0	Good	LFT	2017-08-29	SO-2017.1	0
SO_C_20170728_A_0869.JPG	2017-07-28 15:12:38	58.48715556	-136.0127278	223	Abundance	0	0	0	0	Good	LFT	2017-08-29	SO-2017.1	0
SO_C_20170728_A_0870.JPG	2017-07-28 15:12:39	58.48709722	-136.0135667	223	Abundance	0	0	0	0	Good	LFT	2017-08-29	SO-2017.1	0
SO_C_20170728_A_0871.JPG	2017-07-28 15:12:40	58.48704167	-136.0144028	223	Abundance	0	0	0	0	Good	LFT	2017-08-29	SO-2017.1	0
SO_C_20170728_A_0872.JPG	2017-07-28 15:12:41	58.48698611	-136.0152389	223	Abundance	0	0	0	0	Good	LFT	2017-08-29	SO-2017.1	0
SO_C_20170728_A_0873.JPG	2017-07-28 15:12:42	58.48693889	-136.0160722	225	Abundance	0	0	0	0	Good	LFT	2017-08-29	SO-2017.1	0
SO_C_20170728_A_0874.JPG	2017-07-28 15:12:43	58.48689722	-136.0169028	226	Abundance	0	0	1	0	Good	LFT	2017-08-29	SO-2017.1	0
SO_C_20170728_A_0875.JPG	2017-07-28 15:12:44	58.48686111	-136.0177306	227	Abundance	0	0	1	0	Good	LFT	2017-08-29	SO-2017.1	0
SO_C_20170728_A_0876.JPG	2017-07-28 15:12:45	58.48683056	-136.0185556	227	Abundance	0	0	0	0	Good	LFT	2017-08-29	SO-2017.1	0
SO_C_20170728_A_0877.JPG	2017-07-28 15:12:46	58.48680556	-136.0193806	228	Abundance	0	0	1	0	Good	LFT	2017-08-29	SO-2017.1	0
SO_C_20170728_A_0878.JPG	2017-07-28 15:12:47	58.48678611	-136.0202056	228	Abundance	0	0	1	0	Good	LFT	2017-08-29	SO-2017.1	0
SO_C_20170728_A_0879.JPG	2017-07-28 15:12:48	58.48676944	-136.0210306	227	Abundance	0	0	1	0	Good	LFT	2017-08-29	SO-2017.1	0
SO_C_20170728_A_0880.JPG	2017-07-28 15:12:49	58.48676111	-136.0218583	226	Abundance	0	0	1	0	Good	LFT	2017-08-29	SO-2017.1	0
SO_C_20170728_A_0881.JPG	2017-07-28 15:12:50	58.48675556	-136.0226889	225	Abundance	0	0	1	0	Good	LFT	2017-08-29	SO-2017.1	0
SO_C_20170728_A_0882.JPG	2017-07-28 15:12:51	58.48675833	-136.0235167	224	Abundance	0	0	1	0	Good	LFT	2017-08-29	SO-2017.1	0
SO_C_20170728_A_0883.JPG	2017-07-28 15:12:52	58.48676667	-136.02435	223	Abundance	0	0	1	0	Good	LFT	2017-08-29	SO-2017.1	0
SO_C_20170728_A_0884.JPG	2017-07-28 15:12:53	58.48677778	-136.0251833	222	Abundance	0	0	0	0	Good	LFT	2017-08-29	SO-2017.1	0
SO_C_20170728_A_0885.JPG	2017-07-28 15:12:54	58.48679167	-136.0260167	221	Abundance	0	0	1	0	Good	LFT	2017-08-29	SO-2017.1	0
SO_C_20170728_A_0886.JPG	2017-07-28 15:12:55	58.48680833	-136.0268528	219	Abundance	0	0	1	0	Good	LFT	2017-08-29	SO-2017.1	0
SO_C_20170728_A_0887.JPG	2017-07-28 15:12:56	58.48682778	-136.0276861	218	Abundance	0	0	1	0	Good	LFT	2017-08-29	SO-2017.1	0
SO_C_20170728_A_0888.JPG	2017-07-28 15:12:57	58.48684167	-136.0285194	218	Abundance	0	0	0	0	Good	LFT	2017-08-29	SO-2017.1	0
SO_C_20170728_A_0889.JPG	2017-07-28 15:12:58	58.48685833	-136.02935	218	Abundance	0	0	1	0	Good	LFT	2017-08-29	SO-2017.1	0
SO_C_20170728_A_0890.JPG	2017-07-28 15:12:59	58.48687778	-136.030175	218	Abundance	0	0	1	0	Good	LFT	2017-08-29	SO-2017.1	0
SO_C_20170728_A_0891.JPG	2017-07-28 15:13:00	58.48689444	-136.0309972	218	Abundance	0	0	0	0	Good	LFT	2017-08-29	SO-2017.1	0
SO_C_20170728_A_0892.JPG	2017-07-28 15:13:01	58.48691389	-136.0318111	219	Abundance	0	0	0	0	Good	LFT	2017-08-29	SO-2017.1	0
SO_C_20170728_A_0893.JPG	2017-07-28 15:13:02	58.48693611	-136.032625	219	Abundance	0	0	0	0	Good	LFT	2017-08-29	SO-2017.1	0
SO_C_20170728_A_0894.JPG	2017-07-28 15:13:03	58.48695556	-136.0334333	220	Abundance	0	0	1	0	Good	LFT	2017-08-29	SO-2017.1	0
SO_C_20170728_A_0895.JPG	2017-07-28 15:13:04	58.486975	-136.0342361	220	Abundance	0	0	1	0	Good	LFT	2017-08-29	SO-2017.1	0
SO_C_20170728_A_0896.JPG	2017-07-28 15:13:05	58.48699167	-136.0350361	221	Abundance	0	0	0	0	Good	LFT	2017-08-29	SO-2017.1	0
SO_C_20170728_A_0897.JPG	2017-07-28 15:13:06	58.48700833	-136.0358361	222	Abundance	0	0	0	0	Good	LFT	2017-08-29	SO-2017.1	0
SO_C_20170728_A_0898.JPG	2017-07-28 15:13:07	58.48702222	-136.0366333	222	Abundance	0	0	0	0	Good	LFT	2017-08-29	SO-2017.1	0
SO_C_20170728_A_0899.JPG	2017-07-28 15:13:08	58.48703611	-136.0374278	223	Abundance	0	0	1	0	Good	LFT	2017-08-29	SO-2017.1	0
SO_C_20170728_A_0900.JPG	2017-07-28 15:13:09	58.48704722	-136.0382222	223	Abundance	0	0	1	0	Good	LFT	2017-08-29	SO-2017.1	0
SO_C_20170728_A_0901.JPG	2017-07-28 15:13:10	58.48705556	-136.0390167	223	Abundance	0	0	1	0	Good	LFT	2017-08-29	SO-2017.1	0
SO_C_20170728_A_0902.JPG	2017-07-28 15:13:11	58.48706111	-136.0398111	224	Abundance	0	0	0	0	Good	LFT	2017-08-29	SO-2017.1	0
SO_C_20170728_A_0903.JPG	2017-07-28 15:13:12	58.48706111	-136.0406028	224	Abundance	0	0	1	0	Good	LFT	2017-08-29	SO-2017.1	0
SO_C_20170728_A_0904.JPG	2017-07-28 15:13:13	58.48705833	-136.0414	224	Abundance	0	0	1	0	Good	LFT	2017-08-29	SO-2017.1	0
SO_C_20170728_A_0905.JPG	2017-07-28 15:13:14	58.48705278	-136.0421944	224	Abundance	0	0	0	0	Good	LFT	2017-08-29	SO-2017.1	0
SO_C_20170728_A_0906.JPG	2017-07-28 15:13:15	58.48704167	-136.0429917	223	Abundance	0	0	1	0	Good	LFT	2017-08-29	SO-2017.1	0
SO_C_20170728_A_0907.JPG	2017-07-28 15:13:16	58.48703056	-136.0437917	223	Abundance	0	0	1	0	Good	LFT	2017-08-29	SO-2017.1	0
SO_C_20170728_A_0908.JPG	2017-07-28 15:13:17	58.48701389	-136.0445944	223	Abundance	0	0	0	0	Good	LFT	2017-08-29	SO-2017.1	0
SO_C_20170728_A_0909.JPG	2017-07-28 15:13:18	58.48699444	-136.0454	223	Abundance	0	0	0	0	Good	LFT	2017-08-29	SO-2017.1	0
SO_C_20170728_A_0910.JPG	2017-07-28 15:13:19	58.48697222	-136.0462111	223	Abundance	0	0	0	0	Good	LFT	2017-08-29	SO-2017.1	0
SO_C_20170728_A_0911.JPG	2017-07-28 15:13:20	58.48695278	-136.0470222	223	Abundance	0	0	0	0	Good	LFT	2017-08-29	SO-2017.1	0
SO_C_20170728_A_0912.JPG	2017-07-28 15:13:21	58.48693056	-136.0478361	222	Abundance	0	0	1	0	Good	LFT	2017-08-29	SO-2017.1	0
SO_C_20170728_A_0913.JPG	2017-07-28 15:13:22	58.48690833	-136.0486556	222	Abundance	0	0	1	0	Good	LFT	2017-08-29	SO-2017.1	0
SO_C_20170728_A_0914.JPG	2017-07-28 15:13:23	58.48688611	-136.049475	221	Abundance	0	0	1	0	Good	LFT	2017-08-29	SO-2017.1	0
SO_C_20170728_A_0915.JPG	2017-07-28 15:13:24	58.48685833	-136.0503	221	Abundance	0	0	1	0	Good	LFT	2017-08-29	SO-2017.1	0
SO_C_20170728_A_0916.JPG	2017-07-28 15:13:25	58.48683333	-136.0511222	220	Abundance	0	0	1	0	Good	LFT	2017-08-29	SO-2017.1	0
SO_C_20170728_A_0917.JPG	2017-07-28 15:13:26	58.48680556	-136.0519472	220	Abundance	0	0	1	0	Good	LFT	2017-08-29	SO-2017.1	0
SO_C_20170728_A_0918.JPG	2017-07-28 15:13:27	58.48677778	-136.052775	220	Abundance	0	0	0	0	Good	LFT	2017-08-29	SO-2017.1	0
SO_C_20170728_A_0919.JPG	2017-07-28 15:13:28	58.48675278	-136.0536	220	Abundance	0	0	1	0	Good	LFT	2017-08-29	SO-2017.1	0
SO_C_20170728_A_0920.JPG	2017-07-28 15:13:29	58.48673056	-136.0544278	220	Abundance	0	0	1	0	Good	LFT	2017-08-29	SO-2017.1	0
SO_C_20170728_A_0921.JPG	2017-07-28 15:13:30	58.48671389	-136.0552528	220	Abundance	0	0	0	0	Good	LFT	2017-08-29	SO-2017.1	0
SO_C_20170728_A_0922.JPG	2017-07-28 15:13:31	58.48670278	-136.0560806	221	Abundance	0	0	0	0	Good	LFT	2017-08-29	SO-2017.1	0
SO_C_20170728_A_0924.JPG	2017-07-28 15:13:33	58.48668889	-136.0577333	221	Abundance	0	0	0	0	Good	LFT	2017-08-29	SO-2017.1	0
SO_C_20170728_A_0925.JPG	2017-07-28 15:13:34	58.48668889	-136.0585583	222	Abundance	0	0	0	0	Good	LFT	2017-08-29	SO-2017.1	0
SO_C_20170728_A_0926.JPG	2017-07-28 15:13:35	58.48668889	-136.0593833	222	Abundance	0	0	0	0	Good	LFT	2017-08-29	SO-2017.1	0
SO_C_20170728_A_0927.JPG	2017-07-28 15:13:36	58.48669444	-136.0602111	222	Abundance	0	0	0	0	Good	LFT	2017-08-29	SO-2017.1	0
SO_C_20170728_A_0928.JPG	2017-07-28 15:13:37	58.4867	-136.0610389	222	Abundance	0	0	0	0	Good	LFT	2017-08-29	SO-2017.1	0
SO_C_20170728_A_0929.JPG	2017-07-28 15:13:38	58.48670556	-136.0618667	222	Abundance	0	0	0	0	Good	LFT	2017-08-29	SO-2017.1	0
SO_C_20170728_A_0930.JPG	2017-07-28 15:13:39	58.48670833	-136.0626944	221	Abundance	0	0	0	0	Good	LFT	2017-08-29	SO-2017.1	0
SO_C_20170728_A_0931.JPG	2017-07-28 15:13:40	58.48671389	-136.0635222	222	Abundance	0	0	1	0	Good	LFT	2017-08-29	SO-2017.1	0
SO_C_20170728_A_0932.JPG	2017-07-28 15:13:41	58.48671667	-136.06435	221	Abundance	0	0	0	0	Good	LFT	2017-08-29	SO-2017.1	0
SO_C_20170728_A_0933.JPG	2017-07-28 15:13:42	58.48671944	-136.0651806	222	Abundance	0	0	0	0	Good	LFT	2017-08-29	SO-2017.1	0
SO_C_20170728_A_0934.JPG	2017-07-28 15:13:43	58.48671944	-136.0660139	222	Abundance	0	0	0	0	Good	LFT	2017-08-29	SO-2017.1	0
SO_C_20170728_A_0935.JPG	2017-07-28 15:13:44	58.48671944	-136.0668444	221	Abundance	0	0	0	0	Good	LFT	2017-08-29	SO-2017.1	0
SO_C_20170728_A_0936.JPG	2017-07-28 15:13:45	58.48671389	-136.0676778	222	Abundance	0	0	1	0	Good	LFT	2017-08-29	SO-2017.1	0
SO_C_20170728_A_0937.JPG	2017-07-28 15:13:46	58.48670556	-136.0685139	221	Abundance	0	0	0	0	Good	LFT	2017-08-29	SO-2017.1	0
SO_C_20170728_A_0938.JPG	2017-07-28 15:13:47	58.48669722	-136.06935	221	Abundance	0	0	0	0	Good	LFT	2017-08-29	SO-2017.1	0
SO_C_20170728_A_0939.JPG	2017-07-28 15:13:48	58.48668611	-136.0701861	221	Abundance	0	0	0	0	Good	LFT	2017-08-29	SO-2017.1	0
SO_C_20170728_A_0940.JPG	2017-07-28 15:13:49	58.48667222	-136.0710222	220	Abundance	0	0	0	0	Good	LFT	2017-08-29	SO-2017.1	0
SO_C_20170728_A_0941.JPG	2017-07-28 15:13:50	58.48665556	-136.0718611	220	Abundance	0	0	1	0	Good	LFT	2017-08-29	SO-2017.1	0
SO_C_20170728_A_0942.JPG	2017-07-28 15:13:51	58.48663333	-136.0727	220	Abundance	0	0	0	0	Good	LFT	2017-08-29	SO-2017.1	0
SO_C_20170728_A_0943.JPG	2017-07-28 15:13:52	58.48661389	-136.0735361	220	Abundance	0	0	0	0	Good	LFT	2017-08-29	SO-2017.1	0
SO_C_20170728_A_0944.JPG	2017-07-28 15:13:53	58.48659167	-136.074375	220	Abundance	0	0	0	0	Good	LFT	2017-08-29	SO-2017.1	0
SO_C_20170728_A_0945.JPG	2017-07-28 15:13:54	58.48657222	-136.0752083	221	Abundance	0	0	0	0	Good	LFT	2017-08-29	SO-2017.1	0
SO_C_20170728_A_0946.JPG	2017-07-28 15:13:55	58.48655278	-136.0760444	222	Abundance	0	0	0	0	Good	LFT	2017-08-29	SO-2017.1	0
SO_C_20170728_A_0947.JPG	2017-07-28 15:13:56	58.48653611	-136.0768778	222	Abundance	0	0	0	0	Good	LFT	2017-08-29	SO-2017.1	0
SO_C_20170728_A_0948.JPG	2017-07-28 15:13:57	58.48651944	-136.0777083	223	Abundance	0	0	0	0	Good	LFT	2017-08-29	SO-2017.1	0
SO_C_20170728_A_0949.JPG	2017-07-28 15:13:58	58.48650833	-136.0785389	223	Abundance	0	0	0	0	Good	LFT	2017-08-29	SO-2017.1	0
SO_C_20170728_A_0950.JPG	2017-07-28 15:13:59	58.4865	-136.0793694	224	Abundance	0	0	0	0	Good	LFT	2017-08-29	SO-2017.1	0
SO_C_20170728_A_0951.JPG	2017-07-28 15:14:00	58.48649722	-136.0801972	224	Abundance	0	0	0	0	Good	LFT	2017-08-29	SO-2017.1	0
SO_C_20170728_A_0952.JPG	2017-07-28 15:14:01	58.48649722	-136.0810222	225	Abundance	0	0	0	0	Good	LFT	2017-08-29	SO-2017.1	0
SO_C_20170728_A_0953.JPG	2017-07-28 15:14:02	58.48649722	-136.08185	225	Abundance	0	0	0	0	Good	LFT	2017-08-29	SO-2017.1	0
SO_C_20170728_A_0954.JPG	2017-07-28 15:14:03	58.48650278	-136.0826722	226	Abundance	0	0	0	0	Good	LFT	2017-08-29	SO-2017.1	0
SO_C_20170728_A_0955.JPG	2017-07-28 15:14:04	58.48651111	-136.0834972	227	Abundance	0	0	0	0	Good	LFT	2017-08-29	SO-2017.1	0
SO_C_20170728_A_0956.JPG	2017-07-28 15:14:05	58.48651667	-136.0843167	227	Abundance	0	0	0	0	Good	LFT	2017-08-29	SO-2017.1	0
SO_C_20170728_A_0957.JPG	2017-07-28 15:14:06	58.486525	-136.0851389	227	Abundance	0	0	0	0	Good	LFT	2017-08-29	SO-2017.1	0
SO_C_20170728_A_0958.JPG	2017-07-28 15:14:07	58.48653333	-136.0859611	228	Abundance	0	0	0	0	Good	LFT	2017-08-29	SO-2017.1	0
SO_C_20170728_A_0959.JPG	2017-07-28 15:14:08	58.48654444	-136.0867833	227	Abundance	0	0	0	0	Good	LFT	2017-08-29	SO-2017.1	0
SO_C_20170728_A_0960.JPG	2017-07-28 15:14:09	58.48655278	-136.0876083	227	Abundance	0	0	0	0	Good	LFT	2017-08-29	SO-2017.1	0
SO_C_20170728_A_0961.JPG	2017-07-28 15:14:10	58.48656111	-136.0884333	227	Abundance	0	0	0	0	Good	LFT	2017-08-29	SO-2017.1	0
SO_C_20170728_A_0962.JPG	2017-07-28 15:14:11	58.48656667	-136.0892639	226	Abundance	0	0	0	0	Good	LFT	2017-08-29	SO-2017.1	0
SO_C_20170728_A_0963.JPG	2017-07-28 15:14:12	58.48656667	-136.0900944	227	Abundance	0	0	0	0	Good	LFT	2017-08-29	SO-2017.1	0
SO_C_20170728_A_0964.JPG	2017-07-28 15:14:13	58.48656111	-136.0909306	226	Abundance	0	0	0	0	Good	LFT	2017-08-29	SO-2017.1	0
SO_C_20170728_A_0965.JPG	2017-07-28 15:14:14	58.48655278	-136.0917639	225	Abundance	0	0	0	0	Good	LFT	2017-08-29	SO-2017.1	0
SO_C_20170728_A_0966.JPG	2017-07-28 15:14:15	58.48653889	-136.0926	225	Abundance	0	0	1	0	Good	LFT	2017-08-29	SO-2017.1	0
SO_C_20170728_A_0967.JPG	2017-07-28 15:14:16	58.48651944	-136.0934389	225	Abundance	0	0	1	0	Good	LFT	2017-08-29	SO-2017.1	0
SO_C_20170728_A_0968.JPG	2017-07-28 15:14:17	58.48649167	-136.0942778	225	Abundance	0	0	1	0	Good	LFT	2017-08-29	SO-2017.1	0
SO_C_20170728_A_0969.JPG	2017-07-28 15:14:18	58.48645833	-136.0951167	223	Abundance	0	0	1	0	Good	LFT	2017-08-29	SO-2017.1	0
SO_C_20170728_A_0970.JPG	2017-07-28 15:14:19	58.48642222	-136.0959583	223	Abundance	0	0	0	0	Good	LFT	2017-08-29	SO-2017.1	0
SO_C_20170728_A_0971.JPG	2017-07-28 15:14:20	58.48638333	-136.0968	223	Abundance	0	0	0	0	Good	LFT	2017-08-29	SO-2017.1	0
SO_C_20170728_A_0972.JPG	2017-07-28 15:14:21	58.48634444	-136.0976389	223	Abundance	0	0	0	0	Good	LFT	2017-08-29	SO-2017.1	0
SO_C_20170728_A_0973.JPG	2017-07-28 15:14:22	58.48630278	-136.0984778	223	Abundance	0	0	1	0	Good	LFT	2017-08-29	SO-2017.1	0
SO_C_20170728_A_0974.JPG	2017-07-28 15:14:23	58.48626389	-136.0993139	224	Abundance	0	0	1	1	Good	LFT	2017-08-29	SO-2017.1	0
SO_C_20170728_A_0975.JPG	2017-07-28 15:14:24	58.48622222	-136.1001472	226	Abundance	0	0	0	1	Good	LFT	2017-08-29	SO-2017.1	0
SO_C_20170728_A_0976.JPG	2017-07-28 15:14:25	58.48617778	-136.1009778	227	Abundance	0	0	0	1	Good	LFT	2017-08-29	SO-2017.1	0
SO_C_20170728_A_0977.JPG	2017-07-28 15:14:26	58.48613611	-136.1018028	228	Abundance	0	0	0	0	Good	LFT	2017-08-29	SO-2017.1	0
SO_C_20170728_A_0978.JPG	2017-07-28 15:14:27	58.48609167	-136.1026222	229	Abundance	0	0	0	0	Good	LFT	2017-08-29	SO-2017.1	0
SO_C_20170728_A_0979.JPG	2017-07-28 15:14:28	58.48605	-136.1034361	231	Abundance	0	0	0	0	Good	LFT	2017-08-29	SO-2017.1	0
SO_C_20170728_A_0980.JPG	2017-07-28 15:17:39	58.54535833	-136.0935722	213	Abundance	0	0	0	0	Good	LFT	2017-08-29	SO-2017.1	0
SO_C_20170728_A_0981.JPG	2017-07-28 15:17:40	58.54516389	-136.0927944	211	Abundance	0	0	0	0	Good	LFT	2017-08-29	SO-2017.1	0
SO_C_20170728_A_0982.JPG	2017-07-28 15:17:41	58.54497222	-136.0920167	211	Abundance	0	0	0	0	Good	LFT	2017-08-29	SO-2017.1	0
SO_C_20170728_A_0983.JPG	2017-07-28 15:17:42	58.54479167	-136.0912361	212	Abundance	0	0	0	0	Good	LFT	2017-08-29	SO-2017.1	0
SO_C_20170728_A_0984.JPG	2017-07-28 15:17:43	58.544625	-136.09045	212	Abundance	0	0	0	0	Good	LFT	2017-08-29	SO-2017.1	0
SO_C_20170728_A_0985.JPG	2017-07-28 15:17:44	58.54447222	-136.0896611	214	Abundance	0	0	0	0	Good	LFT	2017-08-29	SO-2017.1	0
SO_C_20170728_A_0986.JPG	2017-07-28 15:17:45	58.54433056	-136.0888694	215	Abundance	0	0	0	0	Good	LFT	2017-08-29	SO-2017.1	0
SO_C_20170728_A_0987.JPG	2017-07-28 15:17:46	58.54420278	-136.088075	215	Abundance	0	0	0	0	Good	LFT	2017-08-29	SO-2017.1	0
SO_C_20170728_A_0988.JPG	2017-07-28 15:17:47	58.54408611	-136.0872833	216	Abundance	0	0	0	0	Good	LFT	2017-08-29	SO-2017.1	0
SO_C_20170728_A_0989.JPG	2017-07-28 15:17:48	58.54398333	-136.0864861	218	Abundance	0	0	0	0	Good	LFT	2017-08-29	SO-2017.1	0
SO_C_20170728_A_0990.JPG	2017-07-28 15:17:49	58.54389444	-136.0856889	218	Abundance	0	0	0	0	Good	LFT	2017-08-29	SO-2017.1	0
SO_C_20170728_A_0991.JPG	2017-07-28 15:17:50	58.54382778	-136.0848917	219	Abundance	0	0	0	0	Good	LFT	2017-08-29	SO-2017.1	0
SO_C_20170728_A_0992.JPG	2017-07-28 15:17:51	58.54377778	-136.0840917	220	Abundance	0	0	0	0	Good	LFT	2017-08-29	SO-2017.1	0
SO_C_20170728_A_0993.JPG	2017-07-28 15:17:52	58.54375	-136.0832972	221	Abundance	0	0	0	0	Good	LFT	2017-08-29	SO-2017.1	0
SO_C_20170728_A_0994.JPG	2017-07-28 15:17:53	58.54374444	-136.0825028	223	Abundance	0	0	0	0	Good	LFT	2017-08-29	SO-2017.1	0
SO_C_20170728_A_0995.JPG	2017-07-28 15:17:54	58.54375278	-136.0817139	223	Abundance	0	0	0	0	Good	LFT	2017-08-29	SO-2017.1	0
SO_C_20170728_A_0996.JPG	2017-07-28 15:17:55	58.543775	-136.080925	225	Abundance	0	0	0	0	Good	LFT	2017-08-29	SO-2017.1	0
SO_C_20170728_A_0997.JPG	2017-07-28 15:17:56	58.54380278	-136.0801361	225	Abundance	0	0	0	0	Good	LFT	2017-08-29	SO-2017.1	0
SO_C_20170728_A_0998.JPG	2017-07-28 15:17:57	58.54383611	-136.07935	224	Abundance	0	0	0	0	Good	LFT	2017-08-29	SO-2017.1	0
SO_C_20170728_A_0999.JPG	2017-07-28 15:17:58	58.54387222	-136.0785611	224	Abundance	0	0	0	0	Good	LFT	2017-08-29	SO-2017.1	0
SO_C_20170728_A_1000.JPG	2017-07-28 15:17:59	58.54390833	-136.0777722	225	Abundance	0	0	0	0	Good	LFT	2017-08-29	SO-2017.1	0
SO_C_20170728_A_1001.JPG	2017-07-28 15:18:00	58.54394167	-136.0769833	225	Abundance	0	0	0	0	Good	LFT	2017-08-29	SO-2017.1	0
SO_C_20170728_A_1002.JPG	2017-07-28 15:18:01	58.54397222	-136.0761944	225	Abundance	0	0	0	0	Good	LFT	2017-08-29	SO-2017.1	0
SO_C_20170728_A_1003.JPG	2017-07-28 15:18:02	58.544	-136.0754028	225	Abundance	0	0	0	0	Good	LFT	2017-08-29	SO-2017.1	0
SO_C_20170728_A_1004.JPG	2017-07-28 15:18:03	58.54402222	-136.0746139	226	Abundance	0	0	0	0	Good	LFT	2017-08-29	SO-2017.1	0
SO_C_20170728_A_1005.JPG	2017-07-28 15:18:04	58.54404722	-136.0738222	227	Abundance	0	0	0	0	Good	LFT	2017-08-29	SO-2017.1	0
SO_C_20170728_A_1006.JPG	2017-07-28 15:18:05	58.54406667	-136.073025	227	Abundance	0	0	0	0	Good	LFT	2017-08-29	SO-2017.1	0
SO_C_20170728_A_1007.JPG	2017-07-28 15:18:06	58.54408333	-136.0722194	226	Abundance	0	0	0	0	Good	LFT	2017-08-29	SO-2017.1	0
SO_C_20170728_A_1008.JPG	2017-07-28 15:18:07	58.54409722	-136.0714111	225	Abundance	0	0	0	0	Good	LFT	2017-08-29	SO-2017.1	0
SO_C_20170728_A_1009.JPG	2017-07-28 15:18:08	58.54410833	-136.0705972	224	Abundance	0	0	0	0	Good	LFT	2017-08-29	SO-2017.1	0
SO_C_20170728_A_1010.JPG	2017-07-28 15:18:09	58.54411111	-136.0697778	224	Abundance	0	0	0	0	Good	LFT	2017-08-29	SO-2017.1	0
SO_C_20170728_A_1011.JPG	2017-07-28 15:18:10	58.54411111	-136.0689556	223	Abundance	0	0	0	0	Good	LFT	2017-08-29	SO-2017.1	0
SO_C_20170728_A_1012.JPG	2017-07-28 15:18:11	58.54410833	-136.0681306	222	Abundance	0	0	0	0	Good	LFT	2017-08-29	SO-2017.1	0
SO_C_20170728_A_1013.JPG	2017-07-28 15:18:12	58.54410278	-136.0673	221	Abundance	0	0	0	0	Good	LFT	2017-08-29	SO-2017.1	0
SO_C_20170728_A_1014.JPG	2017-07-28 15:18:13	58.54409722	-136.0664667	220	Abundance	0	0	0	0	Good	LFT	2017-08-29	SO-2017.1	0
SO_C_20170728_A_1015.JPG	2017-07-28 15:18:14	58.54408889	-136.0656306	220	Abundance	0	0	0	0	Good	LFT	2017-08-29	SO-2017.1	0
SO_C_20170728_A_1016.JPG	2017-07-28 15:18:15	58.54408056	-136.0647972	219	Abundance	0	0	0	0	Good	LFT	2017-08-29	SO-2017.1	0
SO_C_20170728_A_1017.JPG	2017-07-28 15:18:16	58.54406944	-136.0639639	220	Abundance	0	0	0	0	Good	LFT	2017-08-29	SO-2017.1	0
SO_C_20170728_A_1018.JPG	2017-07-28 15:18:17	58.54406111	-136.0631306	220	Abundance	0	0	0	0	Good	LFT	2017-08-29	SO-2017.1	0
SO_C_20170728_A_1019.JPG	2017-07-28 15:18:18	58.54405	-136.0623	221	Abundance	0	0	0	0	Good	LFT	2017-08-29	SO-2017.1	0
SO_C_20170728_A_1020.JPG	2017-07-28 15:18:19	58.54403889	-136.0614667	221	Abundance	0	0	0	0	Good	LFT	2017-08-29	SO-2017.1	0
SO_C_20170728_A_1021.JPG	2017-07-28 15:18:20	58.54402778	-136.0606361	221	Abundance	0	0	0	0	Good	LFT	2017-08-29	SO-2017.1	0
SO_C_20170728_A_1022.JPG	2017-07-28 15:18:21	58.54401944	-136.0598056	222	Abundance	0	0	0	0	Good	LFT	2017-08-29	SO-2017.1	0
SO_C_20170728_A_1023.JPG	2017-07-28 15:18:22	58.54401111	-136.0589778	222	Abundance	0	0	0	0	Good	LFT	2017-08-29	SO-2017.1	0
SO_C_20170728_A_1024.JPG	2017-07-28 15:18:23	58.54400833	-136.0581472	222	Abundance	0	0	0	0	Good	LFT	2017-08-29	SO-2017.1	0
SO_C_20170728_A_1025.JPG	2017-07-28 15:18:24	58.54400556	-136.0573167	222	Abundance	0	0	0	0	Good	LFT	2017-08-29	SO-2017.1	0
SO_C_20170728_A_1026.JPG	2017-07-28 15:18:25	58.54400833	-136.0564861	221	Abundance	0	0	0	0	Good	LFT	2017-08-29	SO-2017.1	0
SO_C_20170728_A_1027.JPG	2017-07-28 15:18:26	58.54401111	-136.0556556	221	Abundance	0	0	0	0	Good	LFT	2017-08-29	SO-2017.1	0
SO_C_20170728_A_1028.JPG	2017-07-28 15:18:27	58.54401389	-136.0548222	221	Abundance	0	0	0	0	Good	LFT	2017-08-29	SO-2017.1	0
SO_C_20170728_A_1029.JPG	2017-07-28 15:18:28	58.54401667	-136.0539889	220	Abundance	0	0	0	0	Good	LFT	2017-08-29	SO-2017.1	0
SO_C_20170728_A_1030.JPG	2017-07-28 15:18:29	58.54401944	-136.05315	219	Abundance	0	0	0	0	Good	LFT	2017-08-29	SO-2017.1	0
SO_C_20170728_A_1031.JPG	2017-07-28 15:18:30	58.54402222	-136.0523111	219	Abundance	0	0	0	0	Good	LFT	2017-08-29	SO-2017.1	0
SO_C_20170728_A_1032.JPG	2017-07-28 15:18:31	58.544025	-136.0514694	218	Abundance	0	0	0	0	Good	LFT	2017-08-29	SO-2017.1	0
SO_C_20170728_A_1033.JPG	2017-07-28 15:18:32	58.54403056	-136.050625	217	Abundance	0	0	0	0	Good	LFT	2017-08-29	SO-2017.1	0
SO_C_20170728_A_1034.JPG	2017-07-28 15:18:33	58.54403611	-136.0497778	217	Abundance	0	0	0	0	Good	LFT	2017-08-29	SO-2017.1	0
SO_C_20170728_A_1035.JPG	2017-07-28 15:18:34	58.54404167	-136.0489306	216	Abundance	0	0	0	0	Good	LFT	2017-08-29	SO-2017.1	0
SO_C_20170728_A_1036.JPG	2017-07-28 15:18:35	58.54404722	-136.0480833	216	Abundance	0	0	0	0	Good	LFT	2017-08-29	SO-2017.1	0
SO_C_20170728_A_1037.JPG	2017-07-28 15:18:36	58.54405556	-136.0472389	216	Abundance	0	0	1	0	Good	LFT	2017-08-29	SO-2017.1	0
SO_C_20170728_A_1038.JPG	2017-07-28 15:18:37	58.54406389	-136.0463917	217	Abundance	0	0	1	0	Good	LFT	2017-08-29	SO-2017.1	0
SO_C_20170728_A_1039.JPG	2017-07-28 15:18:38	58.54407222	-136.0455472	216	Abundance	0	0	0	0	Good	LFT	2017-08-29	SO-2017.1	0
SO_C_20170728_A_1040.JPG	2017-07-28 15:18:39	58.54408056	-136.0447028	216	Abundance	0	0	0	0	Good	LFT	2017-08-29	SO-2017.1	0
SO_C_20170728_A_1041.JPG	2017-07-28 15:18:40	58.54408889	-136.0438583	217	Abundance	0	0	1	0	Good	LFT	2017-08-29	SO-2017.1	0
SO_C_20170728_A_1042.JPG	2017-07-28 15:18:41	58.54409722	-136.0430139	216	Abundance	0	0	0	0	Good	LFT	2017-08-29	SO-2017.1	0
SO_C_20170728_A_1043.JPG	2017-07-28 15:18:42	58.54410556	-136.0421694	216	Abundance	0	0	1	0	Good	LFT	2017-08-29	SO-2017.1	0
SO_C_20170728_A_1044.JPG	2017-07-28 15:18:43	58.54411667	-136.041325	216	Abundance	0	0	1	0	Good	LFT	2017-08-29	SO-2017.1	0
SO_C_20170728_A_1045.JPG	2017-07-28 15:18:44	58.54413056	-136.0404833	216	Abundance	0	0	1	0	Good	LFT	2017-08-29	SO-2017.1	0
SO_C_20170728_A_1046.JPG	2017-07-28 15:18:45	58.54414722	-136.0396389	216	Abundance	0	0	1	0	Good	LFT	2017-08-29	SO-2017.1	0
SO_C_20170728_A_1047.JPG	2017-07-28 15:18:46	58.54416667	-136.0387972	216	Abundance	0	0	1	0	Good	LFT	2017-08-29	SO-2017.1	0
SO_C_20170728_A_1048.JPG	2017-07-28 15:18:47	58.54419167	-136.0379556	216	Abundance	0	0	1	0	Good	LFT	2017-08-29	SO-2017.1	0
SO_C_20170728_A_1049.JPG	2017-07-28 15:18:48	58.54421667	-136.0371139	216	Abundance	0	0	0	0	Good	LFT	2017-08-29	SO-2017.1	0
SO_C_20170728_A_1050.JPG	2017-07-28 15:18:49	58.54424444	-136.0362667	216	Abundance	0	0	0	0	Good	LFT	2017-08-29	SO-2017.1	0
SO_C_20170728_A_1051.JPG	2017-07-28 15:18:50	58.54426944	-136.0354222	215	Abundance	0	0	0	0	Good	LFT	2017-08-29	SO-2017.1	0
SO_C_20170728_A_1052.JPG	2017-07-28 15:18:51	58.54429167	-136.0345722	215	Abundance	0	0	0	0	Good	LFT	2017-08-29	SO-2017.1	0
SO_C_20170728_A_1053.JPG	2017-07-28 15:18:52	58.54431111	-136.0337222	215	Abundance	0	0	0	0	Good	LFT	2017-08-29	SO-2017.1	0
SO_C_20170728_A_1054.JPG	2017-07-28 15:18:53	58.544325	-136.0328722	214	Abundance	0	0	0	0	Good	LFT	2017-08-29	SO-2017.1	0
SO_C_20170728_A_1055.JPG	2017-07-28 15:18:54	58.54433611	-136.0320222	214	Abundance	0	0	1	0	Good	LFT	2017-08-29	SO-2017.1	0
SO_C_20170728_A_1056.JPG	2017-07-28 15:18:55	58.54434722	-136.031175	214	Abundance	0	0	1	0	Good	LFT	2017-08-29	SO-2017.1	0
SO_C_20170728_A_1057.JPG	2017-07-28 15:18:56	58.54435556	-136.0303278	215	Abundance	0	0	0	0	Good	LFT	2017-08-29	SO-2017.1	0
SO_C_20170728_A_1059.JPG	2017-07-28 15:18:58	58.54438056	-136.0286417	216	Abundance	0	0	0	0	Good	LFT	2017-08-29	SO-2017.1	0
SO_C_20170728_A_1060.JPG	2017-07-28 15:18:59	58.54439167	-136.0278028	217	Abundance	0	0	0	0	Good	LFT	2017-08-29	SO-2017.1	0
SO_C_20170728_A_1061.JPG	2017-07-28 15:19:00	58.54440278	-136.0269667	217	Abundance	0	0	0	0	Good	LFT	2017-08-29	SO-2017.1	0
SO_C_20170728_A_1062.JPG	2017-07-28 15:19:01	58.54441389	-136.0261306	218	Abundance	0	0	0	0	Good	LFT	2017-08-29	SO-2017.1	0
SO_C_20170728_A_1063.JPG	2017-07-28 15:19:02	58.544425	-136.0252972	219	Abundance	0	0	1	0	Good	LFT	2017-08-29	SO-2017.1	0
SO_C_20170728_A_1064.JPG	2017-07-28 15:19:03	58.54443889	-136.0244639	219	Abundance	0	0	1	0	Good	LFT	2017-08-29	SO-2017.1	0
SO_C_20170728_A_1065.JPG	2017-07-28 15:19:04	58.54445278	-136.0236333	219	Abundance	0	0	0	0	Good	LFT	2017-08-29	SO-2017.1	0
SO_C_20170728_A_1066.JPG	2017-07-28 15:19:05	58.54446667	-136.0228056	220	Abundance	0	0	0	0	Good	LFT	2017-08-29	SO-2017.1	0
SO_C_20170728_A_1067.JPG	2017-07-28 15:19:06	58.54447778	-136.021975	221	Abundance	0	0	1	0	Good	LFT	2017-08-29	SO-2017.1	0
SO_C_20170728_A_1068.JPG	2017-07-28 15:19:07	58.54449167	-136.0211472	222	Abundance	0	0	1	0	Good	LFT	2017-08-29	SO-2017.1	0
SO_C_20170728_A_1069.JPG	2017-07-28 15:19:08	58.54450278	-136.0203222	222	Abundance	0	0	1	0	Good	LFT	2017-08-29	SO-2017.1	0
SO_C_20170728_A_1070.JPG	2017-07-28 15:19:09	58.54451389	-136.0194944	222	Abundance	0	0	0	0	Good	LFT	2017-08-29	SO-2017.1	0
SO_C_20170728_A_1071.JPG	2017-07-28 15:19:10	58.54452222	-136.0186667	222	Abundance	0	0	0	0	Good	LFT	2017-08-29	SO-2017.1	0
SO_C_20170728_A_1072.JPG	2017-07-28 15:19:11	58.54452778	-136.0178389	222	Abundance	0	0	0	0	Good	LFT	2017-08-29	SO-2017.1	0
SO_C_20170728_A_1073.JPG	2017-07-28 15:19:12	58.54453056	-136.0170083	222	Abundance	0	0	0	0	Good	LFT	2017-08-29	SO-2017.1	0
SO_C_20170728_A_1074.JPG	2017-07-28 15:19:13	58.54453056	-136.0161722	220	Abundance	0	0	0	0	Good	LFT	2017-08-29	SO-2017.1	0
SO_C_20170728_A_1075.JPG	2017-07-28 15:19:14	58.54452778	-136.0153361	220	Abundance	0	0	0	0	Good	LFT	2017-08-29	SO-2017.1	0
SO_C_20170728_A_1076.JPG	2017-07-28 15:19:15	58.54452222	-136.0144972	219	Abundance	0	0	0	0	Good	LFT	2017-08-29	SO-2017.1	0
SO_C_20170728_A_1077.JPG	2017-07-28 15:19:16	58.54451389	-136.0136556	219	Abundance	0	0	0	0	Good	LFT	2017-08-29	SO-2017.1	0
SO_C_20170728_A_1078.JPG	2017-07-28 15:19:17	58.54450278	-136.0128111	218	Abundance	0	0	0	0	Good	LFT	2017-08-29	SO-2017.1	0
SO_C_20170728_A_1079.JPG	2017-07-28 15:19:18	58.54449167	-136.0119667	218	Abundance	0	0	0	0	Good	LFT	2017-08-29	SO-2017.1	0
SO_C_20170728_A_1080.JPG	2017-07-28 15:19:19	58.544475	-136.0111222	218	Abundance	0	0	0	0	Good	LFT	2017-08-29	SO-2017.1	0
SO_C_20170728_A_1081.JPG	2017-07-28 15:19:20	58.54446111	-136.0102806	218	Abundance	0	0	0	0	Good	LFT	2017-08-29	SO-2017.1	0
SO_C_20170728_A_1082.JPG	2017-07-28 15:19:21	58.54444722	-136.0094389	218	Abundance	0	0	0	0	Good	LFT	2017-08-29	SO-2017.1	0
SO_C_20170728_A_1083.JPG	2017-07-28 15:19:22	58.54443611	-136.0086	218	Abundance	0	0	0	0	Good	LFT	2017-08-29	SO-2017.1	0
SO_C_20170728_A_1084.JPG	2017-07-28 15:19:23	58.54442222	-136.0077583	218	Abundance	0	0	0	0	Good	LFT	2017-08-29	SO-2017.1	0
SO_C_20170728_A_1085.JPG	2017-07-28 15:19:24	58.54441111	-136.0069222	218	Abundance	0	0	0	0	Good	LFT	2017-08-29	SO-2017.1	0
SO_C_20170728_A_1086.JPG	2017-07-28 15:19:25	58.54439722	-136.0060861	219	Abundance	0	0	0	0	Good	LFT	2017-08-29	SO-2017.1	0
SO_C_20170728_A_1087.JPG	2017-07-28 15:19:26	58.54438611	-136.0052528	220	Abundance	0	0	0	0	Good	LFT	2017-08-29	SO-2017.1	0
SO_C_20170728_A_1088.JPG	2017-07-28 15:19:27	58.54437778	-136.0044222	221	Abundance	0	0	0	0	Good	LFT	2017-08-29	SO-2017.1	0
SO_C_20170728_A_1089.JPG	2017-07-28 15:19:28	58.54436944	-136.0035944	221	Abundance	0	0	0	0	Good	LFT	2017-08-29	SO-2017.1	0
SO_C_20170728_A_1090.JPG	2017-07-28 15:19:29	58.54436389	-136.0027694	222	Abundance	0	0	0	0	Good	LFT	2017-08-29	SO-2017.1	0
SO_C_20170728_A_1091.JPG	2017-07-28 15:19:30	58.54435833	-136.0019444	223	Abundance	0	0	0	0	Good	LFT	2017-08-29	SO-2017.1	0
SO_C_20170728_A_1092.JPG	2017-07-28 15:19:31	58.54435833	-136.0011222	224	Abundance	0	0	0	0	Good	LFT	2017-08-29	SO-2017.1	0
SO_C_20170728_A_1093.JPG	2017-07-28 15:19:32	58.54436111	-136.0003028	225	Abundance	0	0	0	0	Good	LFT	2017-08-29	SO-2017.1	0
SO_C_20170728_A_1094.JPG	2017-07-28 15:19:33	58.54436944	-135.9994806	224	Abundance	0	0	0	0	Good	LFT	2017-08-29	SO-2017.1	0
SO_C_20170728_A_1095.JPG	2017-07-28 15:19:34	58.54438333	-135.9986556	223	Abundance	0	0	0	0	Good	LFT	2017-08-29	SO-2017.1	0
SO_C_20170728_A_1096.JPG	2017-07-28 15:19:35	58.54439722	-135.9978306	223	Abundance	0	0	0	0	Good	LFT	2017-08-29	SO-2017.1	0
SO_C_20170728_A_1097.JPG	2017-07-28 15:19:36	58.54441389	-135.9970056	222	Abundance	0	0	0	0	Good	LFT	2017-08-29	SO-2017.1	0
SO_C_20170728_A_1098.JPG	2017-07-28 15:19:37	58.54443333	-135.9961778	222	Abundance	0	0	0	0	Good	LFT	2017-08-29	SO-2017.1	0
SO_C_20170728_A_1099.JPG	2017-07-28 15:19:38	58.54445278	-135.9953528	222	Abundance	0	0	0	0	Good	LFT	2017-08-29	SO-2017.1	0
SO_C_20170728_A_1100.JPG	2017-07-28 15:19:39	58.544475	-135.994525	222	Abundance	0	0	0	0	Good	LFT	2017-08-29	SO-2017.1	0
SO_C_20170728_A_1101.JPG	2017-07-28 15:19:40	58.5445	-135.9936972	222	Abundance	0	0	0	0	Good	LFT	2017-08-29	SO-2017.1	0
SO_C_20170728_A_1102.JPG	2017-07-28 15:19:41	58.544525	-135.9928694	222	Abundance	0	0	0	0	Good	LFT	2017-08-29	SO-2017.1	0
SO_C_20170728_A_1103.JPG	2017-07-28 15:19:42	58.54455	-135.9920417	222	Abundance	0	0	0	0	Good	LFT	2017-08-29	SO-2017.1	0
SO_C_20170728_A_1104.JPG	2017-07-28 15:19:43	58.54457778	-135.9912139	222	Abundance	0	0	0	0	Good	LFT	2017-08-29	SO-2017.1	0
SO_C_20170728_A_1105.JPG	2017-07-28 15:19:44	58.54460833	-135.9903861	222	Abundance	0	0	0	0	Good	LFT	2017-08-29	SO-2017.1	0
SO_C_20170728_A_1106.JPG	2017-07-28 15:19:45	58.54463889	-135.9895611	223	Abundance	0	0	0	0	Good	LFT	2017-08-29	SO-2017.1	0
SO_C_20170728_A_1107.JPG	2017-07-28 15:19:46	58.544675	-135.9887333	223	Abundance	0	0	0	0	Good	LFT	2017-08-29	SO-2017.1	0
SO_C_20170728_A_1108.JPG	2017-07-28 15:19:47	58.54471389	-135.9879083	223	Abundance	0	0	0	0	Good	LFT	2017-08-29	SO-2017.1	0
SO_C_20170728_A_1109.JPG	2017-07-28 15:19:48	58.54475278	-135.9870833	224	Abundance	0	0	0	0	Good	LFT	2017-08-29	SO-2017.1	0
SO_C_20170728_A_1110.JPG	2017-07-28 15:21:11	58.54751389	-135.9825611	208	Abundance	0	0	0	0	Good	LFT	2017-08-29	SO-2017.1	0
SO_C_20170728_A_1111.JPG	2017-07-28 15:21:12	58.54730278	-135.9833	208	Abundance	0	0	0	0	Good	LFT	2017-08-29	SO-2017.1	0
SO_C_20170728_A_1112.JPG	2017-07-28 15:21:13	58.54711667	-135.9840611	207	Abundance	0	0	0	0	Good	LFT	2017-08-29	SO-2017.1	0
SO_C_20170728_A_1113.JPG	2017-07-28 15:21:14	58.54695556	-135.9848389	207	Abundance	0	0	0	0	Good	LFT	2017-08-29	SO-2017.1	0
SO_C_20170728_A_1114.JPG	2017-07-28 15:21:15	58.54681667	-135.9856361	206	Abundance	0	0	0	0	Good	LFT	2017-08-29	SO-2017.1	0
SO_C_20170728_A_1115.JPG	2017-07-28 15:21:16	58.54670556	-135.9864472	205	Abundance	0	0	0	0	Good	LFT	2017-08-29	SO-2017.1	0
SO_C_20170728_A_1116.JPG	2017-07-28 15:21:17	58.54662222	-135.9872722	204	Abundance	0	0	0	0	Good	LFT	2017-08-29	SO-2017.1	0
SO_C_20170728_A_1117.JPG	2017-07-28 15:21:18	58.54656667	-135.9881056	204	Abundance	0	0	0	0	Good	LFT	2017-08-29	SO-2017.1	0
SO_C_20170728_A_1118.JPG	2017-07-28 15:21:19	58.54653889	-135.9889444	203	Abundance	0	0	0	0	Good	LFT	2017-08-29	SO-2017.1	0
SO_C_20170728_A_1119.JPG	2017-07-28 15:21:20	58.54653611	-135.9897833	203	Abundance	0	0	0	0	Good	LFT	2017-08-29	SO-2017.1	0
SO_C_20170728_A_1120.JPG	2017-07-28 15:21:21	58.54655556	-135.9906222	202	Abundance	0	0	0	0	Good	LFT	2017-08-29	SO-2017.1	0
SO_C_20170728_A_1121.JPG	2017-07-28 15:21:22	58.54659722	-135.9914556	203	Abundance	0	0	0	0	Good	LFT	2017-08-29	SO-2017.1	0
SO_C_20170728_A_1122.JPG	2017-07-28 15:21:23	58.54664722	-135.9922861	202	Abundance	0	0	0	0	Good	LFT	2017-08-29	SO-2017.1	0
SO_C_20170728_A_1123.JPG	2017-07-28 15:21:24	58.54670278	-135.9931139	202	Abundance	0	0	0	0	Good	LFT	2017-08-29	SO-2017.1	0
SO_C_20170728_A_1124.JPG	2017-07-28 15:21:25	58.54675833	-135.9939389	203	Abundance	0	0	0	0	Good	LFT	2017-08-29	SO-2017.1	0
SO_C_20170728_A_1126.JPG	2017-07-28 15:21:27	58.54686944	-135.9955806	205	Abundance	0	0	0	0	Good	LFT	2017-08-29	SO-2017.1	0
SO_C_20170728_A_1127.JPG	2017-07-28 15:21:28	58.54692778	-135.9964	206	Abundance	0	0	0	0	Good	LFT	2017-08-29	SO-2017.1	0
SO_C_20170728_A_1128.JPG	2017-07-28 15:21:29	58.54698611	-135.9972167	207	Abundance	0	0	0	0	Good	LFT	2017-08-29	SO-2017.1	0
SO_C_20170728_A_1129.JPG	2017-07-28 15:21:30	58.54704722	-135.9980306	208	Abundance	0	0	0	0	Good	LFT	2017-08-29	SO-2017.1	0
SO_C_20170728_A_1130.JPG	2017-07-28 15:21:31	58.54711389	-135.9988389	210	Abundance	0	0	0	0	Good	LFT	2017-08-29	SO-2017.1	0
SO_C_20170728_A_1131.JPG	2017-07-28 15:21:32	58.54718611	-135.9996472	210	Abundance	0	0	0	0	Good	LFT	2017-08-29	SO-2017.1	0
SO_C_20170728_A_1132.JPG	2017-07-28 15:21:33	58.54726111	-136.0004472	211	Abundance	0	0	0	0	Good	LFT	2017-08-29	SO-2017.1	0
SO_C_20170728_A_1133.JPG	2017-07-28 15:21:34	58.54734722	-136.0012444	212	Abundance	0	0	0	0	Good	LFT	2017-08-29	SO-2017.1	0
SO_C_20170728_A_1134.JPG	2017-07-28 15:21:35	58.54743333	-136.0020389	213	Abundance	0	0	0	0	Good	LFT	2017-08-29	SO-2017.1	0
SO_C_20170728_A_1135.JPG	2017-07-28 15:21:36	58.547525	-136.0028278	214	Abundance	0	0	0	0	Good	LFT	2017-08-29	SO-2017.1	0
SO_C_20170728_A_1136.JPG	2017-07-28 15:21:37	58.54761944	-136.0036139	214	Abundance	0	0	0	0	Good	LFT	2017-08-29	SO-2017.1	0
SO_C_20170728_A_1137.JPG	2017-07-28 15:21:38	58.54771667	-136.0043944	216	Abundance	0	0	0	0	Good	LFT	2017-08-29	SO-2017.1	0
SO_C_20170728_A_1138.JPG	2017-07-28 15:21:39	58.54781111	-136.005175	216	Abundance	0	0	0	0	Good	LFT	2017-08-29	SO-2017.1	0
SO_C_20170728_A_1139.JPG	2017-07-28 15:21:40	58.54790556	-136.0059556	217	Abundance	0	0	0	0	Good	LFT	2017-08-29	SO-2017.1	0
SO_C_20170728_A_1140.JPG	2017-07-28 15:21:41	58.54799444	-136.0067361	218	Abundance	0	0	0	0	Good	LFT	2017-08-29	SO-2017.1	0
SO_C_20170728_A_1141.JPG	2017-07-28 15:21:42	58.548075	-136.0075194	219	Abundance	0	0	0	0	Good	LFT	2017-08-29	SO-2017.1	0
SO_C_20170728_A_1142.JPG	2017-07-28 15:21:43	58.54814722	-136.0083056	221	Abundance	0	0	0	0	Good	LFT	2017-08-29	SO-2017.1	0
SO_C_20170728_A_1143.JPG	2017-07-28 15:21:44	58.54821389	-136.0090917	221	Abundance	0	0	0	0	Good	LFT	2017-08-29	SO-2017.1	0
SO_C_20170728_A_1144.JPG	2017-07-28 15:21:45	58.54826944	-136.0098833	222	Abundance	0	0	0	0	Good	LFT	2017-08-29	SO-2017.1	0
SO_C_20170728_A_1145.JPG	2017-07-28 15:21:46	58.54831389	-136.0106778	223	Abundance	0	0	0	0	Good	LFT	2017-08-29	SO-2017.1	0
SO_C_20170728_A_1146.JPG	2017-07-28 15:21:47	58.54831667	-136.0107917	223	Abundance	0	0	0	0	Good	LFT	2017-08-29	SO-2017.1	3
SO_C_20170728_A_1148.JPG	2017-07-28 15:21:49	58.54832222	-136.0110222	223	Abundance	0	0	0	0	Good	LFT	2017-08-29	SO-2017.1	3
SO_C_20170728_A_1149.JPG	2017-07-28 15:21:50	58.54832222	-136.0111361	223	Abundance	0	0	0	0	Good	LFT	2017-08-29	SO-2017.1	3
SO_C_20170728_A_1150.JPG	2017-07-28 15:21:51	58.548325	-136.0112528	223	Abundance	0	0	0	0	Good	LFT	2017-08-29	SO-2017.1	3
SO_C_20170728_A_1151.JPG	2017-07-28 15:21:52	58.54832778	-136.0113667	223	Abundance	0	0	0	0	Good	LFT	2017-08-29	SO-2017.1	3
SO_C_20170728_A_1152.JPG	2017-07-28 15:21:53	58.54833056	-136.0114806	223	Abundance	0	0	0	0	Good	LFT	2017-08-29	SO-2017.1	3
SO_C_20170728_A_1153.JPG	2017-07-28 15:21:54	58.54833333	-136.0115972	223	Abundance	0	0	0	0	Good	LFT	2017-08-29	SO-2017.1	3
SO_C_20170728_A_1154.JPG	2017-07-28 15:21:55	58.54833611	-136.0117111	223	Abundance	0	0	0	0	Good	LFT	2017-08-29	SO-2017.1	3
SO_C_20170728_A_1155.JPG	2017-07-28 15:21:56	58.54833889	-136.011825	223	Abundance	0	0	0	0	Good	LFT	2017-08-29	SO-2017.1	3
SO_C_20170728_A_1156.JPG	2017-07-28 15:21:57	58.54834167	-136.0119417	223	Abundance	0	0	0	0	Good	LFT	2017-08-29	SO-2017.1	3
SO_C_20170728_A_1157.JPG	2017-07-28 15:21:58	58.54834444	-136.0120556	223	Abundance	0	0	0	0	Good	LFT	2017-08-29	SO-2017.1	3
SO_C_20170728_A_1158.JPG	2017-07-28 15:21:59	58.54834722	-136.0121694	223	Abundance	0	0	0	0	Good	LFT	2017-08-29	SO-2017.1	3
SO_C_20170728_A_1159.JPG	2017-07-28 15:22:00	58.54835	-136.0122861	223	Abundance	0	0	0	0	Good	LFT	2017-08-29	SO-2017.1	3
SO_C_20170728_A_1160.JPG	2017-07-28 15:22:01	58.54835278	-136.0124	223	Abundance	0	0	0	0	Good	LFT	2017-08-29	SO-2017.1	3
SO_C_20170728_A_1161.JPG	2017-07-28 15:22:02	58.54835556	-136.0125139	223	Abundance	0	0	0	0	Good	LFT	2017-08-29	SO-2017.1	3
SO_C_20170728_A_1162.JPG	2017-07-28 15:22:03	58.54835833	-136.0126306	223	Abundance	0	0	0	0	Good	LFT	2017-08-29	SO-2017.1	3
SO_C_20170728_A_1163.JPG	2017-07-28 15:22:04	58.54836111	-136.0127444	223	Abundance	0	0	0	0	Good	LFT	2017-08-29	SO-2017.1	3
SO_C_20170728_A_1164.JPG	2017-07-28 15:22:05	58.54836389	-136.0128583	223	Abundance	0	0	0	0	Good	LFT	2017-08-29	SO-2017.1	3
SO_C_20170728_A_1165.JPG	2017-07-28 15:22:06	58.54836389	-136.012975	223	Abundance	0	0	0	0	Good	LFT	2017-08-29	SO-2017.1	3
SO_C_20170728_A_1166.JPG	2017-07-28 15:22:07	58.547775	-136.0279556	225	Abundance	0	0	0	0	Good	LFT	2017-08-29	SO-2017.1	0
SO_C_20170728_A_1167.JPG	2017-07-28 15:22:08	58.54778333	-136.0287889	224	Abundance	0	0	0	0	Good	LFT	2017-08-29	SO-2017.1	0
SO_C_20170728_A_1168.JPG	2017-07-28 15:22:09	58.54779722	-136.0296222	225	Abundance	0	0	0	0	Good	LFT	2017-08-29	SO-2017.1	0
SO_C_20170728_A_1169.JPG	2017-07-28 15:22:10	58.54781389	-136.0304556	225	Abundance	0	0	0	0	Good	LFT	2017-08-29	SO-2017.1	0
SO_C_20170728_A_1170.JPG	2017-07-28 15:22:11	58.54783056	-136.0312889	226	Abundance	0	0	0	0	Good	LFT	2017-08-29	SO-2017.1	0
SO_C_20170728_A_1171.JPG	2017-07-28 15:22:12	58.54784722	-136.032125	226	Abundance	0	0	0	0	Good	LFT	2017-08-29	SO-2017.1	0
SO_C_20170728_A_1172.JPG	2017-07-28 15:22:13	58.54786111	-136.0329611	226	Abundance	0	0	0	0	Good	LFT	2017-08-29	SO-2017.1	0
SO_C_20170728_A_1173.JPG	2017-07-28 15:22:14	58.54787222	-136.0338	227	Abundance	0	0	0	0	Good	LFT	2017-08-29	SO-2017.1	0
SO_C_20170728_A_1174.JPG	2017-07-28 15:22:15	58.54788333	-136.0346417	227	Abundance	0	0	0	0	Good	LFT	2017-08-29	SO-2017.1	0
SO_C_20170728_A_1175.JPG	2017-07-28 15:22:16	58.54788889	-136.0354861	226	Abundance	0	0	0	0	Good	LFT	2017-08-29	SO-2017.1	0
SO_C_20170728_A_1176.JPG	2017-07-28 15:22:17	58.54789167	-136.0363361	225	Abundance	0	0	0	0	Good	LFT	2017-08-29	SO-2017.1	0
SO_C_20170728_A_1177.JPG	2017-07-28 15:22:18	58.54788889	-136.0371861	224	Abundance	0	0	0	0	Good	LFT	2017-08-29	SO-2017.1	0
SO_C_20170728_A_1178.JPG	2017-07-28 15:22:19	58.54788611	-136.0380417	224	Abundance	0	0	0	0	Good	LFT	2017-08-29	SO-2017.1	0
SO_C_20170728_A_1179.JPG	2017-07-28 15:22:20	58.54787778	-136.0389	223	Abundance	0	0	0	0	Good	LFT	2017-08-29	SO-2017.1	0
SO_C_20170728_A_1180.JPG	2017-07-28 15:22:21	58.54786944	-136.0397611	223	Abundance	0	0	1	0	Good	LFT	2017-08-29	SO-2017.1	0
SO_C_20170728_A_1181.JPG	2017-07-28 15:22:22	58.54785556	-136.040625	222	Abundance	0	0	1	0	Good	LFT	2017-08-29	SO-2017.1	0
SO_C_20170728_A_1182.JPG	2017-07-28 15:22:23	58.54783889	-136.0414944	221	Abundance	0	0	0	0	Good	LFT	2017-08-29	SO-2017.1	0
SO_C_20170728_A_1183.JPG	2017-07-28 15:22:24	58.54781944	-136.0423639	221	Abundance	0	0	0	0	Good	LFT	2017-08-29	SO-2017.1	0
SO_C_20170728_A_1184.JPG	2017-07-28 15:22:25	58.54779722	-136.0432361	220	Abundance	0	0	0	0	Good	LFT	2017-08-29	SO-2017.1	0
SO_C_20170728_A_1185.JPG	2017-07-28 15:22:26	58.547775	-136.0441111	220	Abundance	0	0	0	0	Good	LFT	2017-08-29	SO-2017.1	0
SO_C_20170728_A_1186.JPG	2017-07-28 15:22:27	58.54775	-136.0449861	219	Abundance	0	0	0	0	Good	LFT	2017-08-29	SO-2017.1	0
SO_C_20170728_A_1187.JPG	2017-07-28 15:22:28	58.547725	-136.0458611	219	Abundance	0	0	0	0	Good	LFT	2017-08-29	SO-2017.1	0
SO_C_20170728_A_1188.JPG	2017-07-28 15:22:29	58.54770278	-136.0467361	218	Abundance	0	0	0	0	Good	LFT	2017-08-29	SO-2017.1	0
SO_C_20170728_A_1189.JPG	2017-07-28 15:22:30	58.54768611	-136.0476139	219	Abundance	0	0	0	0	Good	LFT	2017-08-29	SO-2017.1	0
SO_C_20170728_A_1190.JPG	2017-07-28 15:22:31	58.547675	-136.0484889	218	Abundance	0	0	0	0	Good	LFT	2017-08-29	SO-2017.1	0
SO_C_20170728_A_1191.JPG	2017-07-28 15:22:32	58.54766944	-136.0493667	218	Abundance	0	0	0	0	Good	LFT	2017-08-29	SO-2017.1	0
SO_C_20170728_A_1192.JPG	2017-07-28 15:22:33	58.54766667	-136.0502417	218	Abundance	0	0	0	0	Good	LFT	2017-08-29	SO-2017.1	0
SO_C_20170728_A_1193.JPG	2017-07-28 15:22:34	58.54766667	-136.0511167	218	Abundance	0	0	0	0	Good	LFT	2017-08-29	SO-2017.1	0
SO_C_20170728_A_1194.JPG	2017-07-28 15:22:35	58.54766944	-136.0519889	219	Abundance	0	0	0	0	Good	LFT	2017-08-29	SO-2017.1	0
SO_C_20170728_A_1195.JPG	2017-07-28 15:22:36	58.547675	-136.0528583	219	Abundance	0	0	0	0	Good	LFT	2017-08-29	SO-2017.1	0
SO_C_20170728_A_1196.JPG	2017-07-28 15:22:37	58.54768056	-136.053725	220	Abundance	0	0	0	0	Good	LFT	2017-08-29	SO-2017.1	0
SO_C_20170728_A_1197.JPG	2017-07-28 15:22:38	58.54768889	-136.0545889	221	Abundance	0	0	0	0	Good	LFT	2017-08-29	SO-2017.1	0
SO_C_20170728_A_1198.JPG	2017-07-28 15:22:39	58.54769722	-136.05545	221	Abundance	0	0	0	0	Good	LFT	2017-08-29	SO-2017.1	0
SO_C_20170728_A_1199.JPG	2017-07-28 15:22:40	58.54770556	-136.0563083	222	Abundance	0	0	0	0	Good	LFT	2017-08-29	SO-2017.1	0
SO_C_20170728_A_1200.JPG	2017-07-28 15:22:41	58.54771667	-136.0571639	222	Abundance	0	0	0	0	Good	LFT	2017-08-29	SO-2017.1	0
SO_C_20170728_A_1201.JPG	2017-07-28 15:22:42	58.54773056	-136.0580194	223	Abundance	0	0	0	0	Good	LFT	2017-08-30	SO-2017.1	0
SO_C_20170728_A_1202.JPG	2017-07-28 15:22:43	58.54774722	-136.0588722	224	Abundance	0	0	0	0	Good	LFT	2017-08-30	SO-2017.1	0
SO_C_20170728_A_1203.JPG	2017-07-28 15:22:44	58.54776389	-136.0597222	224	Abundance	0	0	0	0	Good	LFT	2017-08-30	SO-2017.1	0
SO_C_20170728_A_1204.JPG	2017-07-28 15:22:45	58.54778333	-136.060575	224	Abundance	0	0	1	0	Good	LFT	2017-08-30	SO-2017.1	0
SO_C_20170728_A_1205.JPG	2017-07-28 15:22:46	58.54780278	-136.0614278	224	Abundance	0	0	1	0	Good	LFT	2017-08-30	SO-2017.1	0
SO_C_20170728_A_1206.JPG	2017-07-28 15:22:47	58.547825	-136.0622806	224	Abundance	0	0	0	0	Good	LFT	2017-08-30	SO-2017.1	0
SO_C_20170728_A_1207.JPG	2017-07-28 15:22:48	58.54784722	-136.0631333	224	Abundance	0	0	0	0	Good	LFT	2017-08-30	SO-2017.1	0
SO_C_20170728_A_1208.JPG	2017-07-28 15:22:49	58.54786944	-136.0639861	223	Abundance	0	0	0	0	Good	LFT	2017-08-30	SO-2017.1	0
SO_C_20170728_A_1209.JPG	2017-07-28 15:22:50	58.54788889	-136.0648389	224	Abundance	0	0	0	0	Good	LFT	2017-08-30	SO-2017.1	0
SO_C_20170728_A_1210.JPG	2017-07-28 15:22:51	58.54790556	-136.0656917	224	Abundance	0	0	0	0	Good	LFT	2017-08-30	SO-2017.1	0
SO_C_20170728_A_1211.JPG	2017-07-28 15:22:52	58.54792222	-136.0665472	223	Abundance	0	0	0	0	Good	LFT	2017-08-30	SO-2017.1	0
SO_C_20170728_A_1212.JPG	2017-07-28 15:22:53	58.54793333	-136.0674	223	Abundance	0	0	0	0	Good	LFT	2017-08-30	SO-2017.1	0
SO_C_20170728_A_1213.JPG	2017-07-28 15:22:54	58.54793889	-136.0682583	224	Abundance	0	0	0	0	Good	LFT	2017-08-30	SO-2017.1	0
SO_C_20170728_A_1214.JPG	2017-07-28 15:22:55	58.54794444	-136.0691167	223	Abundance	0	0	0	0	Good	LFT	2017-08-30	SO-2017.1	0
SO_C_20170728_A_1215.JPG	2017-07-28 15:22:56	58.54794444	-136.069975	223	Abundance	0	0	0	0	Good	LFT	2017-08-30	SO-2017.1	0
SO_C_20170728_A_1216.JPG	2017-07-28 15:22:57	58.54793889	-136.0708361	223	Abundance	0	0	0	0	Good	LFT	2017-08-30	SO-2017.1	0
SO_C_20170728_A_1217.JPG	2017-07-28 15:22:58	58.54793056	-136.0717	223	Abundance	0	0	0	0	Good	LFT	2017-08-30	SO-2017.1	0
SO_C_20170728_A_1218.JPG	2017-07-28 15:22:59	58.54791667	-136.0725611	223	Abundance	0	0	0	0	Good	LFT	2017-08-30	SO-2017.1	0
SO_C_20170728_A_1219.JPG	2017-07-28 15:23:00	58.54789444	-136.073425	223	Abundance	0	0	0	0	Good	LFT	2017-08-30	SO-2017.1	0
SO_C_20170728_A_1220.JPG	2017-07-28 15:23:01	58.54786667	-136.0742889	222	Abundance	0	0	0	0	Good	LFT	2017-08-30	SO-2017.1	0
SO_C_20170728_A_1221.JPG	2017-07-28 15:23:02	58.54783333	-136.0751528	222	Abundance	0	0	0	0	Good	LFT	2017-08-30	SO-2017.1	0
SO_C_20170728_A_1222.JPG	2017-07-28 15:23:03	58.5478	-136.0760167	222	Abundance	0	0	0	0	Good	LFT	2017-08-30	SO-2017.1	0
SO_C_20170728_A_1223.JPG	2017-07-28 15:23:04	58.54776667	-136.0768833	222	Abundance	0	0	0	0	Good	LFT	2017-08-30	SO-2017.1	0
SO_C_20170728_A_1224.JPG	2017-07-28 15:23:05	58.54773056	-136.0777472	222	Abundance	0	0	0	0	Good	LFT	2017-08-30	SO-2017.1	0
SO_C_20170728_A_1225.JPG	2017-07-28 15:23:06	58.54769722	-136.0786167	222	Abundance	0	0	0	0	Good	LFT	2017-08-30	SO-2017.1	0
SO_C_20170728_A_1226.JPG	2017-07-28 15:23:07	58.54766389	-136.0794833	222	Abundance	0	0	0	0	Good	LFT	2017-08-30	SO-2017.1	0
SO_C_20170728_A_1227.JPG	2017-07-28 15:23:08	58.54763333	-136.0803472	222	Abundance	0	0	0	0	Good	LFT	2017-08-30	SO-2017.1	0
SO_C_20170728_A_1228.JPG	2017-07-28 15:23:09	58.54760556	-136.0812139	222	Abundance	0	0	0	0	Good	LFT	2017-08-30	SO-2017.1	0
SO_C_20170728_A_1229.JPG	2017-07-28 15:23:10	58.54757778	-136.0820778	222	Abundance	0	0	0	0	Good	LFT	2017-08-30	SO-2017.1	0
SO_C_20170728_A_1230.JPG	2017-07-28 15:23:11	58.54755278	-136.0829417	222	Abundance	0	0	0	0	Good	LFT	2017-08-30	SO-2017.1	0
SO_C_20170728_A_1231.JPG	2017-07-28 15:23:12	58.54752778	-136.0838028	222	Abundance	0	0	0	0	Good	LFT	2017-08-30	SO-2017.1	0
SO_C_20170728_A_1232.JPG	2017-07-28 15:23:13	58.54750833	-136.0846639	223	Abundance	0	0	0	0	Good	LFT	2017-08-30	SO-2017.1	0
SO_C_20170728_A_1233.JPG	2017-07-28 15:23:14	58.54748611	-136.0855222	223	Abundance	0	0	0	0	Good	LFT	2017-08-30	SO-2017.1	0
SO_C_20170728_A_1234.JPG	2017-07-28 15:23:15	58.54746944	-136.0863778	224	Abundance	0	0	0	0	Good	LFT	2017-08-30	SO-2017.1	0
SO_C_20170728_A_1235.JPG	2017-07-28 15:23:16	58.54745	-136.0872333	224	Abundance	0	0	0	0	Good	LFT	2017-08-30	SO-2017.1	0
SO_C_20170728_A_1236.JPG	2017-07-28 15:23:17	58.54743611	-136.0880861	224	Abundance	0	0	0	0	Good	LFT	2017-08-30	SO-2017.1	0
SO_C_20170728_A_1237.JPG	2017-07-28 15:23:18	58.54742222	-136.0889389	225	Abundance	0	0	0	0	Good	LFT	2017-08-30	SO-2017.1	0
SO_C_20170728_A_1238.JPG	2017-07-28 15:23:19	58.54740833	-136.0897889	225	Abundance	0	0	0	0	Good	LFT	2017-08-30	SO-2017.1	0
SO_C_20170728_A_1239.JPG	2017-07-28 15:23:20	58.54739722	-136.0906389	226	Abundance	0	0	0	0	Good	LFT	2017-08-30	SO-2017.1	0
SO_C_20170728_A_1240.JPG	2017-07-28 15:23:21	58.54738889	-136.0914889	226	Abundance	0	0	0	0	Good	LFT	2017-08-30	SO-2017.1	0
SO_C_20170728_A_1241.JPG	2017-07-28 15:23:22	58.54738333	-136.0923389	226	Abundance	0	0	0	0	Good	LFT	2017-08-30	SO-2017.1	0
SO_C_20170728_A_1242.JPG	2017-07-28 15:25:46	58.55115278	-136.102425	230	Abundance	0	0	0	0	Good	LFT	2017-08-30	SO-2017.1	0
SO_C_20170728_A_1243.JPG	2017-07-28 15:25:47	58.55116389	-136.101575	230	Abundance	0	0	0	0	Good	LFT	2017-08-30	SO-2017.1	0
SO_C_20170728_A_1244.JPG	2017-07-28 15:25:48	58.551175	-136.1007278	230	Abundance	0	0	0	0	Good	LFT	2017-08-30	SO-2017.1	0
SO_C_20170728_A_1245.JPG	2017-07-28 15:25:49	58.55118056	-136.0998778	230	Abundance	0	0	0	0	Good	LFT	2017-08-30	SO-2017.1	0
SO_C_20170728_A_1246.JPG	2017-07-28 15:25:50	58.55118611	-136.0990278	230	Abundance	0	0	0	0	Good	LFT	2017-08-30	SO-2017.1	0
SO_C_20170728_A_1247.JPG	2017-07-28 15:25:51	58.55119444	-136.0981806	230	Abundance	0	0	0	0	Good	LFT	2017-08-30	SO-2017.1	0
SO_C_20170728_A_1248.JPG	2017-07-28 15:25:52	58.55120833	-136.0973306	229	Abundance	0	0	0	0	Good	LFT	2017-08-30	SO-2017.1	0
SO_C_20170728_A_1249.JPG	2017-07-28 15:25:53	58.55122222	-136.0964778	229	Abundance	0	0	0	0	Good	LFT	2017-08-30	SO-2017.1	0
SO_C_20170728_A_1250.JPG	2017-07-28 15:25:54	58.55123889	-136.0956278	229	Abundance	0	0	0	0	Good	LFT	2017-08-30	SO-2017.1	0
SO_C_20170728_A_1251.JPG	2017-07-28 15:25:55	58.55125556	-136.0947722	227	Abundance	0	0	0	0	Good	LFT	2017-08-30	SO-2017.1	0
SO_C_20170728_A_1252.JPG	2017-07-28 15:25:56	58.55126944	-136.0939167	227	Abundance	0	0	0	0	Good	LFT	2017-08-30	SO-2017.1	0
SO_C_20170728_A_1253.JPG	2017-07-28 15:25:57	58.55128056	-136.0930611	226	Abundance	0	0	0	0	Good	LFT	2017-08-30	SO-2017.1	0
SO_C_20170728_A_1254.JPG	2017-07-28 15:25:58	58.55129167	-136.0922028	226	Abundance	0	0	0	0	Good	LFT	2017-08-30	SO-2017.1	0
SO_C_20170728_A_1255.JPG	2017-07-28 15:25:59	58.55130278	-136.0913444	225	Abundance	0	0	0	0	Good	LFT	2017-08-30	SO-2017.1	0
SO_C_20170728_A_1256.JPG	2017-07-28 15:26:00	58.55131389	-136.0904861	224	Abundance	0	0	0	0	Good	LFT	2017-08-30	SO-2017.1	0
SO_C_20170728_A_1257.JPG	2017-07-28 15:26:01	58.55132778	-136.0896278	223	Abundance	0	0	0	0	Good	LFT	2017-08-30	SO-2017.1	0
SO_C_20170728_A_1258.JPG	2017-07-28 15:26:02	58.55133611	-136.0887694	222	Abundance	0	0	0	0	Good	LFT	2017-08-30	SO-2017.1	0
SO_C_20170728_A_1259.JPG	2017-07-28 15:26:03	58.55134722	-136.0879167	222	Abundance	0	0	0	0	Good	LFT	2017-08-30	SO-2017.1	0
SO_C_20170728_A_1260.JPG	2017-07-28 15:26:04	58.55135278	-136.0870639	222	Abundance	0	0	0	0	Good	LFT	2017-08-30	SO-2017.1	0
SO_C_20170728_A_1261.JPG	2017-07-28 15:26:05	58.55135833	-136.0862167	222	Abundance	0	0	0	0	Good	LFT	2017-08-30	SO-2017.1	0
SO_C_20170728_A_1262.JPG	2017-07-28 15:26:06	58.55135833	-136.0853694	223	Abundance	0	0	0	0	Good	LFT	2017-08-30	SO-2017.1	0
SO_C_20170728_A_1263.JPG	2017-07-28 15:26:07	58.55135833	-136.0845278	223	Abundance	0	0	0	0	Good	LFT	2017-08-30	SO-2017.1	0
SO_C_20170728_A_1264.JPG	2017-07-28 15:26:08	58.55135833	-136.0836889	224	Abundance	0	0	0	0	Good	LFT	2017-08-30	SO-2017.1	0
SO_C_20170728_A_1265.JPG	2017-07-28 15:26:09	58.55136111	-136.0828528	224	Abundance	0	0	0	0	Good	LFT	2017-08-30	SO-2017.1	0
SO_C_20170728_A_1266.JPG	2017-07-28 15:26:10	58.55136389	-136.0820194	225	Abundance	0	0	0	0	Good	LFT	2017-08-30	SO-2017.1	0
SO_C_20170728_A_1267.JPG	2017-07-28 15:26:11	58.55136389	-136.0811889	226	Abundance	0	0	0	0	Good	LFT	2017-08-30	SO-2017.1	0
SO_C_20170728_A_1268.JPG	2017-07-28 15:26:12	58.55136667	-136.0803639	226	Abundance	0	0	0	0	Good	LFT	2017-08-30	SO-2017.1	0
SO_C_20170728_A_1269.JPG	2017-07-28 15:26:13	58.55136944	-136.0795389	227	Abundance	0	0	0	0	Good	LFT	2017-08-30	SO-2017.1	0
SO_C_20170728_A_1270.JPG	2017-07-28 15:26:14	58.551375	-136.0787139	227	Abundance	0	0	0	0	Good	LFT	2017-08-30	SO-2017.1	0
SO_C_20170728_A_1271.JPG	2017-07-28 15:26:15	58.55138056	-136.0778917	227	Abundance	0	0	0	0	Good	LFT	2017-08-30	SO-2017.1	0
SO_C_20170728_A_1272.JPG	2017-07-28 15:26:16	58.55138611	-136.0770722	228	Abundance	0	0	0	0	Good	LFT	2017-08-30	SO-2017.1	0
SO_C_20170728_A_1273.JPG	2017-07-28 15:26:17	58.55139167	-136.0762528	228	Abundance	0	0	0	0	Good	LFT	2017-08-30	SO-2017.1	0
SO_C_20170728_A_1274.JPG	2017-07-28 15:26:18	58.55139722	-136.0754333	228	Abundance	0	0	0	0	Good	LFT	2017-08-30	SO-2017.1	0
SO_C_20170728_A_1275.JPG	2017-07-28 15:26:20	58.55140833	-136.0737944	227	Abundance	0	0	0	0	Good	LFT	2017-08-30	SO-2017.1	0
SO_C_20170728_A_1276.JPG	2017-07-28 15:26:21	58.55141111	-136.0729722	227	Abundance	0	0	0	0	Good	LFT	2017-08-30	SO-2017.1	0
SO_C_20170728_A_1277.JPG	2017-07-28 15:26:22	58.55141667	-136.07215	227	Abundance	0	0	0	0	Good	LFT	2017-08-30	SO-2017.1	0
SO_C_20170728_A_1278.JPG	2017-07-28 15:26:23	58.55142222	-136.0713278	226	Abundance	0	0	0	0	Good	LFT	2017-08-30	SO-2017.1	0
SO_C_20170728_A_1279.JPG	2017-07-28 15:26:24	58.55142778	-136.0705028	226	Abundance	0	0	0	0	Good	LFT	2017-08-30	SO-2017.1	0
SO_C_20170728_A_1280.JPG	2017-07-28 15:26:25	58.55143333	-136.069675	225	Abundance	0	0	0	0	Good	LFT	2017-08-30	SO-2017.1	0
SO_C_20170728_A_1281.JPG	2017-07-28 15:26:26	58.55143889	-136.0688472	224	Abundance	0	0	0	0	Good	LFT	2017-08-30	SO-2017.1	0
SO_C_20170728_A_1282.JPG	2017-07-28 15:26:27	58.55143889	-136.0680167	223	Abundance	0	0	0	0	Good	LFT	2017-08-30	SO-2017.1	0
SO_C_20170728_A_1283.JPG	2017-07-28 15:26:28	58.55143611	-136.0671861	223	Abundance	0	0	0	0	Good	LFT	2017-08-30	SO-2017.1	0
SO_C_20170728_A_1284.JPG	2017-07-28 15:26:29	58.55143056	-136.0663528	222	Abundance	0	0	0	0	Good	LFT	2017-08-30	SO-2017.1	0
SO_C_20170728_A_1285.JPG	2017-07-28 15:26:30	58.55141944	-136.0655222	222	Abundance	0	0	0	0	Good	LFT	2017-08-30	SO-2017.1	0
SO_C_20170728_A_1286.JPG	2017-07-28 15:26:31	58.55140833	-136.0646861	222	Abundance	0	0	0	0	Good	LFT	2017-08-30	SO-2017.1	0
SO_C_20170728_A_1287.JPG	2017-07-28 15:26:32	58.55139444	-136.0638528	221	Abundance	0	0	0	0	Good	LFT	2017-08-30	SO-2017.1	0
SO_C_20170728_A_1288.JPG	2017-07-28 15:26:33	58.55138056	-136.0630194	221	Abundance	0	0	1	0	Good	LFT	2017-08-30	SO-2017.1	0
SO_C_20170728_A_1289.JPG	2017-07-28 15:26:34	58.55136389	-136.0621861	220	Abundance	0	0	0	0	Good	LFT	2017-08-30	SO-2017.1	0
SO_C_20170728_A_1290.JPG	2017-07-28 15:26:35	58.55134722	-136.0613528	220	Abundance	0	0	0	0	Good	LFT	2017-08-30	SO-2017.1	0
SO_C_20170728_A_1291.JPG	2017-07-28 15:26:36	58.55133333	-136.0605222	220	Abundance	0	0	0	0	Good	LFT	2017-08-30	SO-2017.1	0
SO_C_20170728_A_1292.JPG	2017-07-28 15:26:37	58.55131944	-136.0596917	221	Abundance	0	0	0	0	Good	LFT	2017-08-30	SO-2017.1	0
SO_C_20170728_A_1293.JPG	2017-07-28 15:26:38	58.55131111	-136.0588611	221	Abundance	0	0	0	0	Good	LFT	2017-08-30	SO-2017.1	0
SO_C_20170728_A_1294.JPG	2017-07-28 15:26:38	58.55131111	-136.0588611	221	Abundance	0	0	0	0	Good	LFT	2017-08-30	SO-2017.1	2
SO_C_20170728_A_1295.JPG	2017-07-28 15:26:39	58.55130278	-136.0580333	221	Abundance	0	0	0	0	Good	LFT	2017-08-30	SO-2017.1	0
SO_C_20170728_A_1296.JPG	2017-07-28 15:26:40	58.55129444	-136.0572056	220	Abundance	0	0	0	0	Good	LFT	2017-08-30	SO-2017.1	0
SO_C_20170728_A_1297.JPG	2017-07-28 15:26:41	58.55128333	-136.0563806	221	Abundance	0	0	0	0	Good	LFT	2017-08-30	SO-2017.1	0
SO_C_20170728_A_1298.JPG	2017-07-28 15:26:42	58.551275	-136.0555556	221	Abundance	0	0	0	0	Good	LFT	2017-08-30	SO-2017.1	0
SO_C_20170728_A_1299.JPG	2017-07-28 15:26:43	58.55126389	-136.0547333	221	Abundance	0	0	0	0	Good	LFT	2017-08-30	SO-2017.1	0
SO_C_20170728_A_1300.JPG	2017-07-28 15:26:44	58.55125556	-136.0539139	222	Abundance	0	0	0	0	Good	LFT	2017-08-30	SO-2017.1	0
SO_C_20170728_A_1301.JPG	2017-07-28 15:26:45	58.55125	-136.0530972	223	Abundance	0	0	0	0	Good	LFT	2017-08-30	SO-2017.1	0
SO_C_20170728_A_1302.JPG	2017-07-28 15:26:46	58.55125	-136.0522861	223	Abundance	0	0	0	0	Good	LFT	2017-08-30	SO-2017.1	0
SO_C_20170728_A_1303.JPG	2017-07-28 15:26:47	58.55125278	-136.0514778	224	Abundance	0	0	0	0	Good	LFT	2017-08-30	SO-2017.1	0
SO_C_20170728_A_1304.JPG	2017-07-28 15:26:48	58.55126111	-136.0506722	224	Abundance	0	0	0	0	Good	LFT	2017-08-30	SO-2017.1	0
SO_C_20170728_A_1305.JPG	2017-07-28 15:26:49	58.55126944	-136.0498694	225	Abundance	0	0	0	0	Good	LFT	2017-08-30	SO-2017.1	0
SO_C_20170728_A_1306.JPG	2017-07-28 15:26:50	58.55128333	-136.0490694	226	Abundance	0	0	0	0	Good	LFT	2017-08-30	SO-2017.1	0
SO_C_20170728_A_1307.JPG	2017-07-28 15:26:51	58.55129444	-136.0482722	227	Abundance	0	0	0	0	Good	LFT	2017-08-30	SO-2017.1	0
SO_C_20170728_A_1308.JPG	2017-07-28 15:26:52	58.55130833	-136.0474778	227	Abundance	0	0	0	0	Good	LFT	2017-08-30	SO-2017.1	0
SO_C_20170728_A_1309.JPG	2017-07-28 15:26:53	58.55132222	-136.0466806	227	Abundance	0	0	0	0	Good	LFT	2017-08-30	SO-2017.1	0
SO_C_20170728_A_1310.JPG	2017-07-28 15:26:54	58.55133889	-136.0458861	228	Abundance	0	0	0	0	Good	LFT	2017-08-30	SO-2017.1	0
SO_C_20170728_A_1311.JPG	2017-07-28 15:26:55	58.55135833	-136.0450889	227	Abundance	0	0	0	0	Good	LFT	2017-08-30	SO-2017.1	0
SO_C_20170728_A_1312.JPG	2017-07-28 15:26:56	58.55137778	-136.0442889	227	Abundance	0	0	0	0	Good	LFT	2017-08-30	SO-2017.1	0
SO_C_20170728_A_1313.JPG	2017-07-28 15:26:57	58.55139444	-136.0434889	227	Abundance	0	0	0	0	Good	LFT	2017-08-30	SO-2017.1	0
SO_C_20170728_A_1314.JPG	2017-07-28 15:26:58	58.55141389	-136.0426833	226	Abundance	0	0	0	0	Good	LFT	2017-08-30	SO-2017.1	0
SO_C_20170728_A_1315.JPG	2017-07-28 15:26:59	58.55143056	-136.041875	226	Abundance	0	0	0	0	Good	LFT	2017-08-30	SO-2017.1	0
SO_C_20170728_A_1316.JPG	2017-07-28 15:27:00	58.55144444	-136.0410611	225	Abundance	0	0	0	0	Good	LFT	2017-08-30	SO-2017.1	0
SO_C_20170728_A_1317.JPG	2017-07-28 15:27:01	58.55145833	-136.0402444	225	Abundance	0	0	0	0	Good	LFT	2017-08-30	SO-2017.1	0
SO_C_20170728_A_1318.JPG	2017-07-28 15:27:02	58.55146944	-136.0394222	224	Abundance	0	0	0	0	Good	LFT	2017-08-30	SO-2017.1	0
SO_C_20170728_A_1319.JPG	2017-07-28 15:27:03	58.55147778	-136.0385944	223	Abundance	0	0	0	0	Good	LFT	2017-08-30	SO-2017.1	0
SO_C_20170728_A_1320.JPG	2017-07-28 15:27:04	58.55148333	-136.0377611	222	Abundance	0	0	0	0	Good	LFT	2017-08-30	SO-2017.1	0
SO_C_20170728_A_1321.JPG	2017-07-28 15:27:05	58.55148889	-136.036925	221	Abundance	0	0	0	0	Good	LFT	2017-08-30	SO-2017.1	0
SO_C_20170728_A_1322.JPG	2017-07-28 15:27:06	58.55148889	-136.0360833	221	Abundance	0	0	0	0	Good	LFT	2017-08-30	SO-2017.1	0
SO_C_20170728_A_1323.JPG	2017-07-28 15:27:07	58.55148889	-136.0352444	220	Abundance	0	0	0	0	Good	LFT	2017-08-30	SO-2017.1	0
SO_C_20170728_A_1324.JPG	2017-07-28 15:27:08	58.55148889	-136.0344	220	Abundance	0	0	0	0	Good	LFT	2017-08-30	SO-2017.1	0
SO_C_20170728_A_1325.JPG	2017-07-28 15:27:09	58.55148611	-136.0335583	220	Abundance	0	0	0	0	Good	LFT	2017-08-30	SO-2017.1	0
SO_C_20170728_A_1326.JPG	2017-07-28 15:27:10	58.55148333	-136.0327167	220	Abundance	0	0	0	0	Good	LFT	2017-08-30	SO-2017.1	0
SO_C_20170728_A_1328.JPG	2017-07-28 15:27:12	58.551475	-136.0310361	221	Abundance	0	0	0	0	Good	LFT	2017-08-30	SO-2017.1	0
SO_C_20170728_A_1329.JPG	2017-07-28 15:27:13	58.55147222	-136.0301972	221	Abundance	0	0	0	0	Good	LFT	2017-08-30	SO-2017.1	0
SO_C_20170728_A_1330.JPG	2017-07-28 15:27:14	58.55146944	-136.0293611	222	Abundance	0	0	0	0	Good	LFT	2017-08-30	SO-2017.1	0
SO_C_20170728_A_1331.JPG	2017-07-28 15:27:15	58.55146944	-136.028525	222	Abundance	0	0	0	0	Good	LFT	2017-08-30	SO-2017.1	0
SO_C_20170728_A_1332.JPG	2017-07-28 15:27:16	58.55146944	-136.0276917	223	Abundance	0	0	1	0	Good	LFT	2017-08-30	SO-2017.1	0
SO_C_20170728_A_1334.JPG	2017-07-28 15:27:18	58.55148056	-136.0260278	223	Abundance	0	0	1	1	Good	LFT	2017-08-30	SO-2017.1	0
SO_C_20170728_A_1335.JPG	2017-07-28 15:27:19	58.55149167	-136.0251972	223	Abundance	0	0	1	1	Good	LFT	2017-08-30	SO-2017.1	0
SO_C_20170728_A_1336.JPG	2017-07-28 15:27:20	58.55150556	-136.0243667	223	Abundance	0	0	1	0	Good	LFT	2017-08-30	SO-2017.1	0
SO_C_20170728_A_1337.JPG	2017-07-28 15:27:21	58.55152222	-136.0235361	224	Abundance	0	0	1	0	Good	LFT	2017-08-30	SO-2017.1	0
SO_C_20170728_A_1338.JPG	2017-07-28 15:27:22	58.55154167	-136.0227056	224	Abundance	0	0	0	0	Good	LFT	2017-08-30	SO-2017.1	0
SO_C_20170728_A_1339.JPG	2017-07-28 15:27:23	58.55156389	-136.021875	224	Abundance	0	0	0	0	Good	LFT	2017-08-30	SO-2017.1	0
SO_C_20170728_A_1340.JPG	2017-07-28 15:27:24	58.55158611	-136.0210417	223	Abundance	0	0	0	0	Good	LFT	2017-08-30	SO-2017.1	0
SO_C_20170728_A_1341.JPG	2017-07-28 15:27:25	58.55160833	-136.0202083	223	Abundance	0	0	0	0	Good	LFT	2017-08-30	SO-2017.1	0
SO_C_20170728_A_1342.JPG	2017-07-28 15:27:26	58.55163056	-136.0193722	223	Abundance	0	0	0	0	Good	LFT	2017-08-30	SO-2017.1	0
SO_C_20170728_A_1343.JPG	2017-07-28 15:27:27	58.55165278	-136.0185361	223	Abundance	0	0	0	0	Good	LFT	2017-08-30	SO-2017.1	0
SO_C_20170728_A_1344.JPG	2017-07-28 15:27:28	58.55166944	-136.0176972	222	Abundance	0	0	0	0	Good	LFT	2017-08-30	SO-2017.1	0
SO_C_20170728_A_1345.JPG	2017-07-28 15:27:29	58.55168611	-136.0168556	222	Abundance	0	0	0	0	Good	LFT	2017-08-30	SO-2017.1	0
SO_C_20170728_A_1346.JPG	2017-07-28 15:27:30	58.55169722	-136.0160139	222	Abundance	0	0	0	0	Good	LFT	2017-08-30	SO-2017.1	0
SO_C_20170728_A_1347.JPG	2017-07-28 15:27:31	58.55170278	-136.0151694	222	Abundance	0	0	0	0	Good	LFT	2017-08-30	SO-2017.1	0
SO_C_20170728_A_1349.JPG	2017-07-28 15:27:33	58.55171389	-136.0134833	222	Abundance	0	0	0	0	Good	LFT	2017-08-30	SO-2017.1	0
SO_C_20170728_A_1350.JPG	2017-07-28 15:27:34	58.55171667	-136.0126361	222	Abundance	0	0	0	0	Good	LFT	2017-08-30	SO-2017.1	0
SO_C_20170728_A_1351.JPG	2017-07-28 15:27:35	58.55172222	-136.0117917	222	Abundance	0	0	0	0	Good	LFT	2017-08-30	SO-2017.1	0
SO_C_20170728_A_1352.JPG	2017-07-28 15:27:36	58.551725	-136.01095	222	Abundance	0	0	0	0	Good	LFT	2017-08-30	SO-2017.1	0
SO_C_20170728_A_1353.JPG	2017-07-28 15:27:37	58.55173056	-136.0101083	222	Abundance	0	0	0	0	Good	LFT	2017-08-30	SO-2017.1	0
SO_C_20170728_A_1354.JPG	2017-07-28 15:27:38	58.55173611	-136.0092667	223	Abundance	0	0	0	0	Good	LFT	2017-08-30	SO-2017.1	0
SO_C_20170728_A_1355.JPG	2017-07-28 15:27:39	58.55174444	-136.0084278	224	Abundance	0	0	0	0	Good	LFT	2017-08-30	SO-2017.1	0
SO_C_20170728_A_1356.JPG	2017-07-28 15:27:40	58.55175278	-136.0075917	224	Abundance	0	0	1	0	Good	LFT	2017-08-30	SO-2017.1	0
SO_C_20170728_A_1358.JPG	2017-07-28 15:27:42	58.55178333	-136.0059222	225	Abundance	0	0	1	0	Good	LFT	2017-08-30	SO-2017.1	0
SO_C_20170728_A_1359.JPG	2017-07-28 15:27:43	58.55180278	-136.0050889	226	Abundance	0	0	0	0	Good	LFT	2017-08-30	SO-2017.1	0
SO_C_20170728_A_1360.JPG	2017-07-28 15:27:44	58.551825	-136.0042583	226	Abundance	0	0	1	0	Good	LFT	2017-08-30	SO-2017.1	0
SO_C_20170728_A_1361.JPG	2017-07-28 15:27:45	58.55185	-136.0034278	227	Abundance	0	0	1	0	Good	LFT	2017-08-30	SO-2017.1	0
SO_C_20170728_A_1362.JPG	2017-07-28 15:27:46	58.551875	-136.0025972	227	Abundance	0	0	0	0	Good	LFT	2017-08-30	SO-2017.1	0
SO_C_20170728_A_1363.JPG	2017-07-28 15:27:47	58.55190278	-136.0017667	227	Abundance	0	0	0	0	Good	LFT	2017-08-30	SO-2017.1	0
SO_C_20170728_A_1364.JPG	2017-07-28 15:27:48	58.55192778	-136.0009333	227	Abundance	0	0	1	0	Good	LFT	2017-08-30	SO-2017.1	0
SO_C_20170728_A_1365.JPG	2017-07-28 15:27:49	58.55195	-136.0000972	227	Abundance	0	0	1	0	Good	LFT	2017-08-30	SO-2017.1	0
SO_C_20170728_A_1366.JPG	2017-07-28 15:27:50	58.55196944	-135.9992611	227	Abundance	0	0	1	0	Good	LFT	2017-08-30	SO-2017.1	0
SO_C_20170728_A_1367.JPG	2017-07-28 15:27:51	58.55198889	-135.9984222	227	Abundance	0	0	1	0	Good	LFT	2017-08-30	SO-2017.1	0
SO_C_20170728_A_1368.JPG	2017-07-28 15:27:52	58.55200278	-135.9975833	226	Abundance	0	0	1	0	Good	LFT	2017-08-30	SO-2017.1	0
SO_C_20170728_A_1369.JPG	2017-07-28 15:27:53	58.55201667	-135.9967417	226	Abundance	0	0	1	0	Good	LFT	2017-08-30	SO-2017.1	0
SO_C_20170728_A_1370.JPG	2017-07-28 15:27:54	58.55202778	-135.9958972	226	Abundance	0	0	1	0	Good	LFT	2017-08-30	SO-2017.1	0
SO_C_20170728_A_1371.JPG	2017-07-28 15:27:55	58.55203333	-135.99505	225	Abundance	0	0	0	0	Good	LFT	2017-08-30	SO-2017.1	0
SO_C_20170728_A_1372.JPG	2017-07-28 15:27:56	58.55203889	-135.9942028	225	Abundance	0	0	0	0	Good	LFT	2017-08-30	SO-2017.1	0
SO_C_20170728_A_1373.JPG	2017-07-28 15:27:57	58.55204444	-135.9933528	224	Abundance	0	0	0	0	Good	LFT	2017-08-30	SO-2017.1	0
SO_C_20170728_A_1374.JPG	2017-07-28 15:27:58	58.55204722	-135.9925	223	Abundance	0	0	0	0	Good	LFT	2017-08-30	SO-2017.1	0
SO_C_20170728_A_1375.JPG	2017-07-28 15:27:59	58.55205	-135.9916472	223	Abundance	0	0	0	0	Good	LFT	2017-08-30	SO-2017.1	0
SO_C_20170728_A_1376.JPG	2017-07-28 15:28:00	58.55205	-135.9907944	222	Abundance	0	0	0	0	Good	LFT	2017-08-30	SO-2017.1	0
SO_C_20170728_A_1377.JPG	2017-07-28 15:29:47	58.55618611	-135.9530528	218	Abundance	0	0	1	1	Good	LFT	2017-08-30	SO-2017.1	0
SO_C_20170728_A_1378.JPG	2017-07-28 15:29:48	58.55615556	-135.9538611	218	Abundance	0	0	0	1	Good	LFT	2017-08-30	SO-2017.1	0
SO_C_20170728_A_1379.JPG	2017-07-28 15:29:49	58.55613056	-135.9546694	219	Abundance	0	0	0	1	Good	LFT	2017-08-30	SO-2017.1	0
SO_C_20170728_A_1380.JPG	2017-07-28 15:29:50	58.55610556	-135.9554722	221	Abundance	0	0	0	1	Good	LFT	2017-08-30	SO-2017.1	0
SO_C_20170728_A_1381.JPG	2017-07-28 15:29:51	58.55608333	-135.956275	223	Abundance	0	0	0	1	Good	LFT	2017-08-30	SO-2017.1	0
SO_C_20170728_A_1382.JPG	2017-07-28 15:29:52	58.55606389	-135.9570778	224	Abundance	0	0	0	1	Good	LFT	2017-08-30	SO-2017.1	0
SO_C_20170728_A_1383.JPG	2017-07-28 15:29:53	58.55605	-135.9578778	225	Abundance	0	0	0	1	Good	LFT	2017-08-30	SO-2017.1	0
SO_C_20170728_A_1384.JPG	2017-07-28 15:29:54	58.55603611	-135.9586806	226	Abundance	0	0	0	1	Good	LFT	2017-08-30	SO-2017.1	0
SO_C_20170728_A_1385.JPG	2017-07-28 15:29:55	58.55601944	-135.9594806	228	Abundance	0	0	0	1	Good	LFT	2017-08-30	SO-2017.1	0
SO_C_20170728_A_1386.JPG	2017-07-28 15:29:56	58.55600556	-135.9602861	228	Abundance	0	0	0	1	Good	LFT	2017-08-30	SO-2017.1	0
SO_C_20170728_A_1387.JPG	2017-07-28 15:29:57	58.55599444	-135.9610944	229	Abundance	0	0	0	1	Good	LFT	2017-08-30	SO-2017.1	0
SO_C_20170728_A_1388.JPG	2017-07-28 15:29:58	58.55598333	-135.9619056	229	Abundance	0	0	0	1	Good	LFT	2017-08-30	SO-2017.1	0
SO_C_20170728_A_1389.JPG	2017-07-28 15:29:59	58.55597778	-135.9627222	229	Abundance	0	0	0	1	Good	LFT	2017-08-30	SO-2017.1	0
SO_C_20170728_A_1390.JPG	2017-07-28 15:30:00	58.55597222	-135.9635389	229	Abundance	0	0	0	1	Good	LFT	2017-08-30	SO-2017.1	0
SO_C_20170728_A_1391.JPG	2017-07-28 15:30:01	58.55596667	-135.9643611	229	Abundance	0	0	1	1	Good	LFT	2017-08-30	SO-2017.1	0
SO_C_20170728_A_1392.JPG	2017-07-28 15:30:02	58.55596111	-135.9651833	229	Abundance	0	0	1	1	Good	LFT	2017-08-30	SO-2017.1	0
SO_C_20170728_A_1393.JPG	2017-07-28 15:30:03	58.55595556	-135.9660083	229	Abundance	0	0	1	0	Good	LFT	2017-08-30	SO-2017.1	0
SO_C_20170728_A_1394.JPG	2017-07-28 15:30:04	58.55595	-135.9668389	229	Abundance	0	0	1	0	Good	LFT	2017-08-30	SO-2017.1	0
SO_C_20170728_A_1395.JPG	2017-07-28 15:30:05	58.55594167	-135.9676694	229	Abundance	0	0	1	0	Good	LFT	2017-08-30	SO-2017.1	0
SO_C_20170728_A_1396.JPG	2017-07-28 15:30:06	58.55593056	-135.9685056	228	Abundance	0	0	1	0	Good	LFT	2017-08-30	SO-2017.1	0
SO_C_20170728_A_1397.JPG	2017-07-28 15:30:07	58.55591667	-135.9693444	227	Abundance	0	0	1	0	Good	LFT	2017-08-30	SO-2017.1	0
SO_C_20170728_A_1398.JPG	2017-07-28 15:30:08	58.55589722	-135.9701889	227	Abundance	0	0	1	0	Good	LFT	2017-08-30	SO-2017.1	0
SO_C_20170728_A_1399.JPG	2017-07-28 15:30:09	58.55588056	-135.9710361	227	Abundance	0	0	1	0	Good	LFT	2017-08-30	SO-2017.1	0
SO_C_20170728_A_1400.JPG	2017-07-28 15:30:10	58.55585833	-135.9718861	226	Abundance	0	0	1	0	Good	LFT	2017-08-30	SO-2017.1	0
SO_C_20170728_A_1401.JPG	2017-07-28 15:30:11	58.55583611	-135.9727389	226	Abundance	0	0	0	0	Good	LFT	2017-08-30	SO-2017.1	0
SO_C_20170728_A_1402.JPG	2017-07-28 15:30:12	58.55581389	-135.9735944	226	Abundance	0	0	0	0	Good	LFT	2017-08-30	SO-2017.1	0
SO_C_20170728_A_1403.JPG	2017-07-28 15:30:13	58.55578611	-135.97445	226	Abundance	0	0	0	0	Good	LFT	2017-08-30	SO-2017.1	0
SO_C_20170728_A_1404.JPG	2017-07-28 15:30:14	58.55575833	-135.9753083	226	Abundance	0	0	0	0	Good	LFT	2017-08-30	SO-2017.1	0
SO_C_20170728_A_1405.JPG	2017-07-28 15:30:15	58.55572778	-135.9761694	226	Abundance	0	0	0	0	Good	LFT	2017-08-30	SO-2017.1	0
SO_C_20170728_A_1406.JPG	2017-07-28 15:30:16	58.55569444	-135.9770306	226	Abundance	0	0	0	0	Good	LFT	2017-08-30	SO-2017.1	0
SO_C_20170728_A_1407.JPG	2017-07-28 15:30:17	58.55566389	-135.9778917	226	Abundance	0	0	0	0	Good	LFT	2017-08-30	SO-2017.1	0
SO_C_20170728_A_1408.JPG	2017-07-28 15:30:18	58.55563611	-135.9787528	226	Abundance	0	0	0	0	Good	LFT	2017-08-30	SO-2017.1	0
SO_C_20170728_A_1409.JPG	2017-07-28 15:30:19	58.55560833	-135.9796139	226	Abundance	0	0	0	0	Good	LFT	2017-08-30	SO-2017.1	0
SO_C_20170728_A_1410.JPG	2017-07-28 15:30:20	58.55558333	-135.980475	226	Abundance	0	0	0	0	Good	LFT	2017-08-30	SO-2017.1	0
SO_C_20170728_A_1411.JPG	2017-07-28 15:30:21	58.55556111	-135.9813361	227	Abundance	0	0	0	0	Good	LFT	2017-08-30	SO-2017.1	0
SO_C_20170728_A_1412.JPG	2017-07-28 15:30:22	58.55553889	-135.9821944	227	Abundance	0	0	0	0	Good	LFT	2017-08-30	SO-2017.1	0
SO_C_20170728_A_1413.JPG	2017-07-28 15:30:23	58.55551944	-135.9830528	227	Abundance	0	0	0	0	Good	LFT	2017-08-30	SO-2017.1	0
SO_C_20170728_A_1414.JPG	2017-07-28 15:30:24	58.55550556	-135.9839083	227	Abundance	0	0	0	0	Good	LFT	2017-08-30	SO-2017.1	0
SO_C_20170728_A_1415.JPG	2017-07-28 15:30:25	58.55549444	-135.9847639	227	Abundance	0	0	0	0	Good	LFT	2017-08-30	SO-2017.1	0
SO_C_20170728_A_1416.JPG	2017-07-28 15:30:26	58.55548889	-135.9856167	228	Abundance	0	0	0	0	Good	LFT	2017-08-30	SO-2017.1	0
SO_C_20170728_A_1417.JPG	2017-07-28 15:30:27	58.55548889	-135.9864694	228	Abundance	0	0	0	0	Good	LFT	2017-08-30	SO-2017.1	0
SO_C_20170728_A_1418.JPG	2017-07-28 15:30:28	58.55548889	-135.9873194	228	Abundance	0	0	0	0	Good	LFT	2017-08-30	SO-2017.1	0
SO_C_20170728_A_1419.JPG	2017-07-28 15:30:29	58.55549722	-135.9881667	229	Abundance	0	0	0	0	Good	LFT	2017-08-30	SO-2017.1	0
SO_C_20170728_A_1420.JPG	2017-07-28 15:30:30	58.55550556	-135.9890167	228	Abundance	0	0	0	0	Good	LFT	2017-08-30	SO-2017.1	0
SO_C_20170728_A_1421.JPG	2017-07-28 15:30:31	58.55551389	-135.9898639	228	Abundance	0	0	0	0	Good	LFT	2017-08-30	SO-2017.1	0
SO_C_20170728_A_1422.JPG	2017-07-28 15:30:32	58.555525	-135.9907111	228	Abundance	0	0	1	0	Good	LFT	2017-08-30	SO-2017.1	0
SO_C_20170728_A_1423.JPG	2017-07-28 15:30:33	58.55553611	-135.9915611	228	Abundance	0	0	1	0	Good	LFT	2017-08-30	SO-2017.1	0
SO_C_20170728_A_1424.JPG	2017-07-28 15:30:34	58.55554722	-135.9924111	228	Abundance	0	0	0	0	Good	LFT	2017-08-30	SO-2017.1	0
SO_C_20170728_A_1425.JPG	2017-07-28 15:30:35	58.55555278	-135.9932583	227	Abundance	0	0	1	0	Good	LFT	2017-08-30	SO-2017.1	0
SO_C_20170728_A_1426.JPG	2017-07-28 15:30:36	58.55555833	-135.9941083	227	Abundance	0	0	1	0	Good	LFT	2017-08-30	SO-2017.1	0
SO_C_20170728_A_1427.JPG	2017-07-28 15:30:37	58.55556111	-135.9949556	227	Abundance	0	0	1	0	Good	LFT	2017-08-30	SO-2017.1	0
SO_C_20170728_A_1428.JPG	2017-07-28 15:30:38	58.55556111	-135.9958028	227	Abundance	0	0	1	0	Good	LFT	2017-08-30	SO-2017.1	0
SO_C_20170728_A_1429.JPG	2017-07-28 15:30:39	58.55556111	-135.9966472	227	Abundance	0	0	1	0	Good	LFT	2017-08-30	SO-2017.1	0
SO_C_20170728_A_1430.JPG	2017-07-28 15:30:40	58.55555833	-135.9974944	227	Abundance	0	0	1	0	Good	LFT	2017-08-30	SO-2017.1	0
SO_C_20170728_A_1431.JPG	2017-07-28 15:30:41	58.55555833	-135.9983389	227	Abundance	0	0	1	0	Good	LFT	2017-08-30	SO-2017.1	0
SO_C_20170728_A_1432.JPG	2017-07-28 15:30:42	58.55555833	-135.9991833	227	Abundance	0	0	0	0	Good	LFT	2017-08-30	SO-2017.1	0
SO_C_20170728_A_1433.JPG	2017-07-28 15:30:43	58.55555556	-136.0000306	226	Abundance	0	0	1	0	Good	LFT	2017-08-30	SO-2017.1	0
SO_C_20170728_A_1434.JPG	2017-07-28 15:30:44	58.55555556	-136.000875	225	Abundance	0	0	0	0	Good	LFT	2017-08-30	SO-2017.1	0
SO_C_20170728_A_1435.JPG	2017-07-28 15:30:45	58.55555278	-136.0017194	224	Abundance	0	0	0	0	Good	LFT	2017-08-30	SO-2017.1	0
SO_C_20170728_A_1436.JPG	2017-07-28 15:30:46	58.55554722	-136.0025667	224	Abundance	0	0	0	0	Good	LFT	2017-08-30	SO-2017.1	0
SO_C_20170728_A_1437.JPG	2017-07-28 15:30:47	58.55554444	-136.0034111	224	Abundance	0	0	0	0	Good	LFT	2017-08-30	SO-2017.1	0
SO_C_20170728_A_1438.JPG	2017-07-28 15:30:48	58.55553611	-136.0042556	224	Abundance	0	0	0	0	Good	LFT	2017-08-30	SO-2017.1	0
SO_C_20170728_A_1439.JPG	2017-07-28 15:30:49	58.55552778	-136.0051	223	Abundance	0	0	0	0	Good	LFT	2017-08-30	SO-2017.1	0
SO_C_20170728_A_1440.JPG	2017-07-28 15:30:50	58.55551389	-136.0059444	223	Abundance	0	0	0	0	Good	LFT	2017-08-30	SO-2017.1	0
SO_C_20170728_A_1441.JPG	2017-07-28 15:30:51	58.55550278	-136.0067861	223	Abundance	0	0	0	0	Good	LFT	2017-08-30	SO-2017.1	0
SO_C_20170728_A_1442.JPG	2017-07-28 15:30:52	58.55548889	-136.0076306	223	Abundance	0	0	1	0	Good	LFT	2017-08-30	SO-2017.1	0
SO_C_20170728_A_1443.JPG	2017-07-28 15:30:53	58.55547778	-136.0084722	222	Abundance	0	0	0	0	Good	LFT	2017-08-30	SO-2017.1	0
SO_C_20170728_A_1444.JPG	2017-07-28 15:30:54	58.55546389	-136.0093139	222	Abundance	0	0	0	0	Good	LFT	2017-08-30	SO-2017.1	0
SO_C_20170728_A_1445.JPG	2017-07-28 15:30:55	58.55545	-136.0101528	222	Abundance	0	0	0	0	Good	LFT	2017-08-30	SO-2017.1	0
SO_C_20170728_A_1446.JPG	2017-07-28 15:30:56	58.55543889	-136.0109917	221	Abundance	0	0	1	0	Good	LFT	2017-08-30	SO-2017.1	0
SO_C_20170728_A_1447.JPG	2017-07-28 15:30:57	58.55542778	-136.0118306	221	Abundance	0	0	1	0	Good	LFT	2017-08-30	SO-2017.1	0
SO_C_20170728_A_1448.JPG	2017-07-28 15:30:58	58.555425	-136.0126667	221	Abundance	0	0	1	0	Good	LFT	2017-08-30	SO-2017.1	0
SO_C_20170728_A_1449.JPG	2017-07-28 15:30:59	58.55542222	-136.0135	221	Abundance	0	0	1	0	Good	LFT	2017-08-30	SO-2017.1	0
SO_C_20170728_A_1450.JPG	2017-07-28 15:31:00	58.55542222	-136.0143306	222	Abundance	0	0	1	0	Good	LFT	2017-08-30	SO-2017.1	0
SO_C_20170728_A_1452.JPG	2017-07-28 15:31:02	58.55542222	-136.0159889	222	Abundance	0	0	1	1	Good	LFT	2017-08-30	SO-2017.1	0
SO_C_20170728_A_1453.JPG	2017-07-28 15:31:03	58.555425	-136.0168111	223	Abundance	0	0	1	1	Good	LFT	2017-08-30	SO-2017.1	0
SO_C_20170728_A_1454.JPG	2017-07-28 15:31:04	58.555425	-136.0176333	223	Abundance	0	0	1	0	Good	LFT	2017-08-30	SO-2017.1	0
SO_C_20170728_A_1455.JPG	2017-07-28 15:31:05	58.555425	-136.01845	224	Abundance	0	0	1	0	Good	LFT	2017-08-30	SO-2017.1	0
SO_C_20170728_A_1456.JPG	2017-07-28 15:31:06	58.55542222	-136.0192667	224	Abundance	0	0	1	0	Good	LFT	2017-08-30	SO-2017.1	0
SO_C_20170728_A_1459.JPG	2017-07-28 15:31:09	58.55541944	-136.0217	227	Abundance	0	0	1	0	Good	LFT	2017-08-30	SO-2017.1	0
SO_C_20170728_A_1460.JPG	2017-07-28 15:31:10	58.55541944	-136.0225111	227	Abundance	0	0	1	0	Good	LFT	2017-08-30	SO-2017.1	0
SO_C_20170728_A_1461.JPG	2017-07-28 15:31:11	58.55541944	-136.0233222	226	Abundance	0	0	1	0	Good	LFT	2017-08-30	SO-2017.1	0
SO_C_20170728_A_1462.JPG	2017-07-28 15:31:12	58.55541944	-136.0241361	226	Abundance	0	0	1	0	Good	LFT	2017-08-30	SO-2017.1	0
SO_C_20170728_A_1463.JPG	2017-07-28 15:31:13	58.55541944	-136.0249528	226	Abundance	0	0	1	0	Good	LFT	2017-08-30	SO-2017.1	0
SO_C_20170728_A_1464.JPG	2017-07-28 15:31:14	58.55541667	-136.025775	224	Abundance	0	0	1	0	Good	LFT	2017-08-30	SO-2017.1	0
SO_C_20170728_A_1465.JPG	2017-07-28 15:31:15	58.55540833	-136.0265972	223	Abundance	0	0	0	0	Good	LFT	2017-08-30	SO-2017.1	0
SO_C_20170728_A_1466.JPG	2017-07-28 15:31:16	58.5554	-136.0274222	223	Abundance	0	0	0	0	Good	LFT	2017-08-30	SO-2017.1	0
SO_C_20170728_A_1467.JPG	2017-07-28 15:31:17	58.55538889	-136.02825	222	Abundance	0	0	0	0	Good	LFT	2017-08-30	SO-2017.1	0
SO_C_20170728_A_1468.JPG	2017-07-28 15:31:18	58.55537222	-136.0290806	221	Abundance	0	0	0	0	Good	LFT	2017-08-30	SO-2017.1	0
SO_C_20170728_A_1469.JPG	2017-07-28 15:31:19	58.55535556	-136.0299083	221	Abundance	0	0	0	0	Good	LFT	2017-08-30	SO-2017.1	0
SO_C_20170728_A_1470.JPG	2017-07-28 15:31:20	58.55533611	-136.0307361	221	Abundance	0	0	0	0	Good	LFT	2017-08-30	SO-2017.1	0
SO_C_20170728_A_1471.JPG	2017-07-28 15:31:21	58.55531389	-136.0315639	222	Abundance	0	0	0	0	Good	LFT	2017-08-30	SO-2017.1	0
SO_C_20170728_A_1472.JPG	2017-07-28 15:31:22	58.55529167	-136.0323917	222	Abundance	0	0	0	0	Good	LFT	2017-08-30	SO-2017.1	0
SO_C_20170728_A_1473.JPG	2017-07-28 15:31:23	58.55526944	-136.0332167	223	Abundance	0	0	0	0	Good	LFT	2017-08-30	SO-2017.1	0
SO_C_20170728_A_1474.JPG	2017-07-28 15:31:24	58.55524722	-136.0340417	223	Abundance	0	0	0	0	Good	LFT	2017-08-30	SO-2017.1	0
SO_C_20170728_A_1475.JPG	2017-07-28 15:31:25	58.555225	-136.0348639	224	Abundance	0	0	0	0	Good	LFT	2017-08-30	SO-2017.1	0
SO_C_20170728_A_1476.JPG	2017-07-28 15:31:26	58.55520278	-136.0356861	224	Abundance	0	0	0	0	Good	LFT	2017-08-30	SO-2017.1	0
SO_C_20170728_A_1477.JPG	2017-07-28 15:31:27	58.55518333	-136.0365083	225	Abundance	0	0	0	0	Good	LFT	2017-08-30	SO-2017.1	0
SO_C_20170728_A_1478.JPG	2017-07-28 15:31:28	58.55516667	-136.0373278	226	Abundance	0	0	0	0	Good	LFT	2017-08-30	SO-2017.1	0
SO_C_20170728_A_1479.JPG	2017-07-28 15:31:29	58.55515556	-136.0381472	226	Abundance	0	0	0	0	Good	LFT	2017-08-30	SO-2017.1	0
SO_C_20170728_A_1480.JPG	2017-07-28 15:31:30	58.55514722	-136.0389694	226	Abundance	0	0	0	0	Good	LFT	2017-08-30	SO-2017.1	0
SO_C_20170728_A_1481.JPG	2017-07-28 15:31:31	58.55514167	-136.0397889	226	Abundance	0	0	0	0	Good	LFT	2017-08-30	SO-2017.1	0
SO_C_20170728_A_1482.JPG	2017-07-28 15:31:32	58.55513611	-136.0406083	226	Abundance	0	0	0	0	Good	LFT	2017-08-30	SO-2017.1	0
SO_C_20170728_A_1483.JPG	2017-07-28 15:31:33	58.55513333	-136.0414278	226	Abundance	0	0	0	0	Good	LFT	2017-08-30	SO-2017.1	0
SO_C_20170728_A_1484.JPG	2017-07-28 15:31:34	58.55513333	-136.04225	226	Abundance	0	0	0	0	Good	LFT	2017-08-30	SO-2017.1	0
SO_C_20170728_A_1485.JPG	2017-07-28 15:31:35	58.55513611	-136.043075	226	Abundance	0	0	0	0	Good	LFT	2017-08-30	SO-2017.1	0
SO_C_20170728_A_1486.JPG	2017-07-28 15:31:36	58.55513889	-136.0438972	225	Abundance	0	0	0	0	Good	LFT	2017-08-30	SO-2017.1	0
SO_C_20170728_A_1487.JPG	2017-07-28 15:31:37	58.55513889	-136.044725	225	Abundance	0	0	0	0	Good	LFT	2017-08-30	SO-2017.1	0
SO_C_20170728_A_1488.JPG	2017-07-28 15:31:38	58.55514167	-136.04555	225	Abundance	0	0	0	0	Good	LFT	2017-08-30	SO-2017.1	0
SO_C_20170728_A_1489.JPG	2017-07-28 15:31:39	58.55513889	-136.0463806	224	Abundance	0	0	0	0	Good	LFT	2017-08-30	SO-2017.1	0
SO_C_20170728_A_1490.JPG	2017-07-28 15:31:40	58.55513611	-136.0472111	224	Abundance	0	0	0	0	Good	LFT	2017-08-30	SO-2017.1	0
SO_C_20170728_A_1491.JPG	2017-07-28 15:31:41	58.55513333	-136.0480417	224	Abundance	0	0	0	0	Good	LFT	2017-08-30	SO-2017.1	0
SO_C_20170728_A_1492.JPG	2017-07-28 15:31:42	58.555125	-136.048875	223	Abundance	0	0	0	0	Good	LFT	2017-08-30	SO-2017.1	0
SO_C_20170728_A_1493.JPG	2017-07-28 15:31:43	58.55511667	-136.0497083	223	Abundance	0	0	0	0	Good	LFT	2017-08-30	SO-2017.1	0
SO_C_20170728_A_1494.JPG	2017-07-28 15:31:44	58.55510556	-136.0505389	223	Abundance	0	0	0	0	Good	LFT	2017-08-30	SO-2017.1	0
SO_C_20170728_A_1495.JPG	2017-07-28 15:31:45	58.55509167	-136.0513722	223	Abundance	0	0	0	0	Good	LFT	2017-08-30	SO-2017.1	0
SO_C_20170728_A_1496.JPG	2017-07-28 15:31:46	58.55507778	-136.0522056	223	Abundance	0	0	0	0	Good	LFT	2017-08-30	SO-2017.1	0
SO_C_20170728_A_1497.JPG	2017-07-28 15:31:47	58.55506111	-136.0530417	223	Abundance	0	0	0	0	Good	LFT	2017-08-30	SO-2017.1	0
SO_C_20170728_A_1498.JPG	2017-07-28 15:31:48	58.55504444	-136.0538722	223	Abundance	0	0	0	0	Good	LFT	2017-08-30	SO-2017.1	0
SO_C_20170728_A_1499.JPG	2017-07-28 15:31:49	58.55503056	-136.0547056	223	Abundance	0	0	0	0	Good	LFT	2017-08-30	SO-2017.1	0
SO_C_20170728_A_1500.JPG	2017-07-28 15:31:50	58.55501667	-136.0555389	223	Abundance	0	0	0	0	Good	LFT	2017-08-30	SO-2017.1	0
SO_C_20170728_A_1501.JPG	2017-07-28 15:31:51	58.55500556	-136.0563722	224	Abundance	0	0	0	0	Good	LFT	2017-08-30	SO-2017.1	0
SO_C_20170728_A_1502.JPG	2017-07-28 15:31:52	58.55499722	-136.0572028	224	Abundance	0	0	0	0	Good	LFT	2017-08-30	SO-2017.1	0
SO_C_20170728_A_1503.JPG	2017-07-28 15:31:53	58.55499167	-136.0580361	225	Abundance	0	0	0	0	Good	LFT	2017-08-30	SO-2017.1	0
SO_C_20170728_A_1504.JPG	2017-07-28 15:31:54	58.55498889	-136.0588694	225	Abundance	0	0	0	0	Good	LFT	2017-08-30	SO-2017.1	0
SO_C_20170728_A_1505.JPG	2017-07-28 15:31:55	58.55498889	-136.0597	224	Abundance	0	0	0	0	Good	LFT	2017-08-30	SO-2017.1	0
SO_C_20170728_A_1506.JPG	2017-07-28 15:31:56	58.55499167	-136.0605306	224	Abundance	0	0	0	0	Good	LFT	2017-08-30	SO-2017.1	0
SO_C_20170728_A_1507.JPG	2017-07-28 15:31:57	58.55499444	-136.0613611	224	Abundance	0	0	0	0	Good	LFT	2017-08-30	SO-2017.1	0
SO_C_20170728_A_1508.JPG	2017-07-28 15:31:58	58.555	-136.0621944	224	Abundance	0	0	0	0	Good	LFT	2017-08-30	SO-2017.1	0
SO_C_20170728_A_1509.JPG	2017-07-28 15:31:59	58.55500278	-136.063025	224	Abundance	0	0	0	0	Good	LFT	2017-08-30	SO-2017.1	0
SO_C_20170728_A_1510.JPG	2017-07-28 15:32:00	58.55500278	-136.0638556	224	Abundance	0	0	0	0	Good	LFT	2017-08-30	SO-2017.1	0
SO_C_20170728_A_1511.JPG	2017-07-28 15:32:01	58.555	-136.0646861	225	Abundance	0	0	0	0	Good	LFT	2017-08-30	SO-2017.1	0
SO_C_20170728_A_1512.JPG	2017-07-28 15:32:02	58.55499444	-136.0655167	225	Abundance	0	0	0	0	Good	LFT	2017-08-30	SO-2017.1	0
SO_C_20170728_A_1513.JPG	2017-07-28 15:32:03	58.55498333	-136.0663472	225	Abundance	0	0	0	0	Good	LFT	2017-08-30	SO-2017.1	0
SO_C_20170728_A_1514.JPG	2017-07-28 15:32:04	58.55497222	-136.067175	225	Abundance	0	0	0	0	Good	LFT	2017-08-30	SO-2017.1	0
SO_C_20170728_A_1515.JPG	2017-07-28 15:34:37	58.55834722	-136.1031222	231	Abundance	0	0	0	0	Good	LFT	2017-08-30	SO-2017.1	0
SO_C_20170728_A_1516.JPG	2017-07-28 15:34:38	58.558275	-136.1023056	232	Abundance	0	0	0	0	Good	LFT	2017-08-30	SO-2017.1	0
SO_C_20170728_A_1517.JPG	2017-07-28 15:34:39	58.55821944	-136.1014889	232	Abundance	0	0	0	0	Good	LFT	2017-08-30	SO-2017.1	0
SO_C_20170728_A_1518.JPG	2017-07-28 15:34:40	58.55818056	-136.1006722	233	Abundance	0	0	0	0	Good	LFT	2017-08-30	SO-2017.1	0
SO_C_20170728_A_1519.JPG	2017-07-28 15:34:41	58.55815278	-136.0998556	233	Abundance	0	0	0	0	Good	LFT	2017-08-30	SO-2017.1	0
SO_C_20170728_A_1520.JPG	2017-07-28 15:34:42	58.55813889	-136.0990361	233	Abundance	0	0	0	0	Good	LFT	2017-08-30	SO-2017.1	0
SO_C_20170728_A_1521.JPG	2017-07-28 15:34:43	58.55813611	-136.0982194	234	Abundance	0	0	0	0	Good	LFT	2017-08-30	SO-2017.1	0
SO_C_20170728_A_1522.JPG	2017-07-28 15:34:44	58.55814167	-136.0974	235	Abundance	0	0	0	0	Good	LFT	2017-08-30	SO-2017.1	0
SO_C_20170728_A_1523.JPG	2017-07-28 15:34:45	58.55815278	-136.0965806	234	Abundance	0	0	0	0	Good	LFT	2017-08-30	SO-2017.1	0
SO_C_20170728_A_1524.JPG	2017-07-28 15:34:46	58.55816944	-136.0957583	234	Abundance	0	0	0	0	Good	LFT	2017-08-30	SO-2017.1	0
SO_C_20170728_A_1525.JPG	2017-07-28 15:34:47	58.55819444	-136.0949361	233	Abundance	0	0	0	0	Good	LFT	2017-08-30	SO-2017.1	0
SO_C_20170728_A_1526.JPG	2017-07-28 15:34:48	58.55822222	-136.0941083	232	Abundance	0	0	0	0	Good	LFT	2017-08-30	SO-2017.1	0
SO_C_20170728_A_1527.JPG	2017-07-28 15:34:49	58.55825556	-136.0932778	231	Abundance	0	0	0	0	Good	LFT	2017-08-30	SO-2017.1	0
SO_C_20170728_A_1528.JPG	2017-07-28 15:34:50	58.55828889	-136.0924444	230	Abundance	0	0	0	0	Good	LFT	2017-08-30	SO-2017.1	0
SO_C_20170728_A_1529.JPG	2017-07-28 15:34:51	58.55832778	-136.0916056	228	Abundance	0	0	0	0	Good	LFT	2017-08-30	SO-2017.1	0
SO_C_20170728_A_1530.JPG	2017-07-28 15:34:52	58.55836667	-136.0907611	227	Abundance	0	0	0	0	Good	LFT	2017-08-30	SO-2017.1	0
SO_C_20170728_A_1531.JPG	2017-07-28 15:34:53	58.55840556	-136.0899139	226	Abundance	0	0	0	0	Good	LFT	2017-08-30	SO-2017.1	0
SO_C_20170728_A_1532.JPG	2017-07-28 15:34:54	58.55844444	-136.0890639	224	Abundance	0	0	0	0	Good	LFT	2017-08-30	SO-2017.1	0
SO_C_20170728_A_1533.JPG	2017-07-28 15:34:55	58.55848056	-136.0882139	224	Abundance	0	0	0	0	Good	LFT	2017-08-30	SO-2017.1	0
SO_C_20170728_A_1534.JPG	2017-07-28 15:34:56	58.55851111	-136.0873694	223	Abundance	0	0	0	0	Good	LFT	2017-08-30	SO-2017.1	0
SO_C_20170728_A_1535.JPG	2017-07-28 15:34:57	58.55854167	-136.086525	223	Abundance	0	0	0	0	Good	LFT	2017-08-30	SO-2017.1	0
SO_C_20170728_A_1536.JPG	2017-07-28 15:34:58	58.55856944	-136.0856861	223	Abundance	0	0	0	0	Good	LFT	2017-08-30	SO-2017.1	0
SO_C_20170728_A_1537.JPG	2017-07-28 15:34:59	58.55859444	-136.08485	224	Abundance	0	0	0	0	Good	LFT	2017-08-30	SO-2017.1	0
SO_C_20170728_A_1538.JPG	2017-07-28 15:35:00	58.55861389	-136.0840167	224	Abundance	0	0	0	0	Good	LFT	2017-08-30	SO-2017.1	0
SO_C_20170728_A_1539.JPG	2017-07-28 15:35:01	58.55862778	-136.0831861	224	Abundance	0	0	0	0	Good	LFT	2017-08-30	SO-2017.1	0
SO_C_20170728_A_1540.JPG	2017-07-28 15:35:02	58.55863611	-136.0823611	225	Abundance	0	0	0	0	Good	LFT	2017-08-30	SO-2017.1	0
SO_C_20170728_A_1541.JPG	2017-07-28 15:35:03	58.55863889	-136.0815389	226	Abundance	0	0	0	0	Good	LFT	2017-08-30	SO-2017.1	0
SO_C_20170728_A_1542.JPG	2017-07-28 15:35:04	58.55864167	-136.0807194	226	Abundance	0	0	0	0	Good	LFT	2017-08-30	SO-2017.1	0
SO_C_20170728_A_1543.JPG	2017-07-28 15:35:05	58.55864167	-136.0799	226	Abundance	0	0	0	0	Good	LFT	2017-08-30	SO-2017.1	0
SO_C_20170728_A_1544.JPG	2017-07-28 15:35:06	58.55863889	-136.0790833	226	Abundance	0	0	0	0	Good	LFT	2017-08-30	SO-2017.1	0
SO_C_20170728_A_1545.JPG	2017-07-28 15:35:07	58.55863611	-136.0782667	227	Abundance	0	0	0	0	Good	LFT	2017-08-30	SO-2017.1	0
SO_C_20170728_A_1546.JPG	2017-07-28 15:35:08	58.55863333	-136.0774528	227	Abundance	0	0	0	0	Good	LFT	2017-08-30	SO-2017.1	0
SO_C_20170728_A_1547.JPG	2017-07-28 15:35:09	58.558625	-136.0766361	227	Abundance	0	0	0	0	Good	LFT	2017-08-30	SO-2017.1	0
SO_C_20170728_A_1548.JPG	2017-07-28 15:35:10	58.55861389	-136.0758222	227	Abundance	0	0	0	0	Good	LFT	2017-08-30	SO-2017.1	0
SO_C_20170728_A_1549.JPG	2017-07-28 15:35:11	58.5586	-136.0750083	227	Abundance	0	0	0	0	Good	LFT	2017-08-30	SO-2017.1	0
SO_C_20170728_A_1550.JPG	2017-07-28 15:35:12	58.55858611	-136.0741944	227	Abundance	0	0	0	0	Good	LFT	2017-08-30	SO-2017.1	0
SO_C_20170728_A_1551.JPG	2017-07-28 15:35:13	58.55857222	-136.0733778	227	Abundance	0	0	0	0	Good	LFT	2017-08-30	SO-2017.1	0
SO_C_20170728_A_1552.JPG	2017-07-28 15:35:14	58.55855833	-136.0725611	226	Abundance	0	0	0	0	Good	LFT	2017-08-30	SO-2017.1	0
SO_C_20170728_A_1553.JPG	2017-07-28 15:35:15	58.55854444	-136.0717417	225	Abundance	0	0	0	0	Good	LFT	2017-08-30	SO-2017.1	0
SO_C_20170728_A_1554.JPG	2017-07-28 15:35:16	58.55852778	-136.0709194	225	Abundance	0	0	0	0	Good	LFT	2017-08-30	SO-2017.1	0
SO_C_20170728_A_1555.JPG	2017-07-28 15:35:17	58.55851111	-136.0701	225	Abundance	0	0	0	0	Good	LFT	2017-08-30	SO-2017.1	0
SO_C_20170728_A_1556.JPG	2017-07-28 15:35:18	58.55849444	-136.069275	225	Abundance	0	0	0	0	Good	LFT	2017-08-30	SO-2017.1	0
SO_C_20170728_A_1557.JPG	2017-07-28 15:35:19	58.55848056	-136.06845	224	Abundance	0	0	0	0	Good	LFT	2017-08-30	SO-2017.1	0
SO_C_20170728_A_1558.JPG	2017-07-28 15:35:20	58.55846667	-136.0676222	223	Abundance	0	0	0	0	Good	LFT	2017-08-30	SO-2017.1	0
SO_C_20170728_A_1559.JPG	2017-07-28 15:35:21	58.55845278	-136.0667944	223	Abundance	0	0	0	0	Good	LFT	2017-08-30	SO-2017.1	0
SO_C_20170728_A_1560.JPG	2017-07-28 15:35:22	58.55843889	-136.0659639	222	Abundance	0	0	0	0	Good	LFT	2017-08-30	SO-2017.1	0
SO_C_20170728_A_1561.JPG	2017-07-28 15:35:23	58.55842778	-136.0651333	222	Abundance	0	0	0	0	Good	LFT	2017-08-30	SO-2017.1	0
SO_C_20170728_A_1562.JPG	2017-07-28 15:35:24	58.55841667	-136.0643	221	Abundance	0	0	0	0	Good	LFT	2017-08-30	SO-2017.1	0
SO_C_20170728_A_1563.JPG	2017-07-28 15:35:25	58.55840833	-136.0634667	221	Abundance	0	0	0	0	Good	LFT	2017-08-30	SO-2017.1	0
SO_C_20170728_A_1564.JPG	2017-07-28 15:35:26	58.55840278	-136.0626333	221	Abundance	0	0	0	0	Good	LFT	2017-08-30	SO-2017.1	0
SO_C_20170728_A_1565.JPG	2017-07-28 15:35:27	58.55840278	-136.0618028	221	Abundance	0	0	1	0	Good	LFT	2017-08-30	SO-2017.1	0
SO_C_20170728_A_1566.JPG	2017-07-28 15:35:28	58.55840556	-136.0609722	221	Abundance	0	0	0	0	Good	LFT	2017-08-30	SO-2017.1	0
SO_C_20170728_A_1567.JPG	2017-07-28 15:35:29	58.55841389	-136.0601444	222	Abundance	0	0	0	0	Good	LFT	2017-08-30	SO-2017.1	0
SO_C_20170728_A_1568.JPG	2017-07-28 15:35:30	58.55842222	-136.0593167	222	Abundance	0	0	0	0	Good	LFT	2017-08-30	SO-2017.1	0
SO_C_20170728_A_1569.JPG	2017-07-28 15:35:31	58.55843889	-136.0584917	223	Abundance	0	0	0	0	Good	LFT	2017-08-30	SO-2017.1	0
SO_C_20170728_A_1570.JPG	2017-07-28 15:35:32	58.55845833	-136.0576667	223	Abundance	0	0	0	0	Good	LFT	2017-08-30	SO-2017.1	0
SO_C_20170728_A_1571.JPG	2017-07-28 15:35:33	58.55848056	-136.0568417	223	Abundance	0	0	0	0	Good	LFT	2017-08-30	SO-2017.1	0
SO_C_20170728_A_1572.JPG	2017-07-28 15:35:34	58.55850278	-136.0560167	223	Abundance	0	0	0	0	Good	LFT	2017-08-30	SO-2017.1	0
SO_C_20170728_A_1573.JPG	2017-07-28 15:35:35	58.55852778	-136.0551944	223	Abundance	0	0	0	0	Good	LFT	2017-08-30	SO-2017.1	0
SO_C_20170728_A_1574.JPG	2017-07-28 15:35:36	58.55855556	-136.0543694	223	Abundance	0	0	0	0	Good	LFT	2017-08-30	SO-2017.1	0
SO_C_20170728_A_1575.JPG	2017-07-28 15:35:37	58.55858056	-136.0535472	223	Abundance	0	0	0	0	Good	LFT	2017-08-30	SO-2017.1	0
SO_C_20170728_A_1576.JPG	2017-07-28 15:35:38	58.55860833	-136.052725	223	Abundance	0	0	0	0	Good	LFT	2017-08-30	SO-2017.1	0
SO_C_20170728_A_1577.JPG	2017-07-28 15:35:39	58.55863056	-136.0519028	224	Abundance	0	0	0	0	Good	LFT	2017-08-30	SO-2017.1	0
SO_C_20170728_A_1578.JPG	2017-07-28 15:35:40	58.55865556	-136.0510833	223	Abundance	0	0	0	0	Good	LFT	2017-08-30	SO-2017.1	0
SO_C_20170728_A_1579.JPG	2017-07-28 15:35:41	58.55868056	-136.0502611	223	Abundance	0	0	0	0	Good	LFT	2017-08-30	SO-2017.1	0
SO_C_20170728_A_1580.JPG	2017-07-28 15:35:42	58.55870556	-136.0494389	223	Abundance	0	0	0	0	Good	LFT	2017-08-30	SO-2017.1	0
SO_C_20170728_A_1581.JPG	2017-07-28 15:35:43	58.558725	-136.0486194	224	Abundance	0	0	0	0	Good	LFT	2017-08-30	SO-2017.1	0
SO_C_20170728_A_1582.JPG	2017-07-28 15:35:44	58.55874167	-136.0478	224	Abundance	0	0	0	0	Good	LFT	2017-08-30	SO-2017.1	0
SO_C_20170728_A_1583.JPG	2017-07-28 15:35:45	58.55875278	-136.0469806	224	Abundance	0	0	0	0	Good	LFT	2017-08-30	SO-2017.1	0
SO_C_20170728_A_1584.JPG	2017-07-28 15:35:46	58.55876111	-136.0461611	225	Abundance	0	0	0	0	Good	LFT	2017-08-30	SO-2017.1	0
SO_C_20170728_A_1585.JPG	2017-07-28 15:35:47	58.55877222	-136.0453444	225	Abundance	0	0	0	0	Good	LFT	2017-08-30	SO-2017.1	0
SO_C_20170728_A_1586.JPG	2017-07-28 15:35:48	58.55878056	-136.0445278	226	Abundance	0	0	0	0	Good	LFT	2017-08-30	SO-2017.1	0
SO_C_20170728_A_1587.JPG	2017-07-28 15:35:49	58.55878889	-136.0437139	226	Abundance	0	0	0	0	Good	LFT	2017-08-30	SO-2017.1	0
SO_C_20170728_A_1588.JPG	2017-07-28 15:35:50	58.55879722	-136.0429	227	Abundance	0	0	0	0	Good	LFT	2017-08-30	SO-2017.1	0
SO_C_20170728_A_1589.JPG	2017-07-28 15:35:51	58.55880278	-136.0420833	227	Abundance	0	0	0	0	Good	LFT	2017-08-30	SO-2017.1	0
SO_C_20170728_A_1590.JPG	2017-07-28 15:35:52	58.55880833	-136.0412694	227	Abundance	0	0	0	0	Good	LFT	2017-08-30	SO-2017.1	0
SO_C_20170728_A_1591.JPG	2017-07-28 15:35:53	58.55881111	-136.0404556	227	Abundance	0	0	0	0	Good	LFT	2017-08-30	SO-2017.1	0
SO_C_20170728_A_1592.JPG	2017-07-28 15:35:54	58.55881389	-136.0396389	228	Abundance	0	0	0	0	Good	LFT	2017-08-30	SO-2017.1	0
SO_C_20170728_A_1593.JPG	2017-07-28 15:35:55	58.55881667	-136.0388222	228	Abundance	0	0	0	0	Good	LFT	2017-08-30	SO-2017.1	0
SO_C_20170728_A_1594.JPG	2017-07-28 15:35:56	58.55881944	-136.0380028	228	Abundance	0	0	0	0	Good	LFT	2017-08-30	SO-2017.1	0
SO_C_20170728_A_1595.JPG	2017-07-28 15:35:57	58.55881944	-136.0371833	228	Abundance	0	0	0	0	Good	LFT	2017-08-30	SO-2017.1	0
SO_C_20170728_A_1596.JPG	2017-07-28 15:35:58	58.55881944	-136.0363639	228	Abundance	0	0	0	0	Good	LFT	2017-08-30	SO-2017.1	0
SO_C_20170728_A_1597.JPG	2017-07-28 15:35:59	58.55881944	-136.0355444	229	Abundance	0	0	0	0	Good	LFT	2017-08-30	SO-2017.1	0
SO_C_20170728_A_1598.JPG	2017-07-28 15:36:00	58.55881944	-136.034725	229	Abundance	0	0	0	0	Good	LFT	2017-08-30	SO-2017.1	0
SO_C_20170728_A_1599.JPG	2017-07-28 15:36:01	58.55881667	-136.0339056	228	Abundance	0	0	0	0	Good	LFT	2017-08-30	SO-2017.1	0
SO_C_20170728_A_1600.JPG	2017-07-28 15:36:02	58.55881389	-136.0330833	228	Abundance	0	0	0	0	Good	LFT	2017-08-30	SO-2017.1	0
SO_C_20170728_A_1601.JPG	2017-07-28 15:36:03	58.55880556	-136.0322639	229	Abundance	0	0	0	0	Good	LFT	2017-08-30	SO-2017.1	0
SO_C_20170728_A_1602.JPG	2017-07-28 15:36:04	58.5588	-136.0314417	230	Abundance	0	0	0	0	Good	LFT	2017-08-30	SO-2017.1	0
SO_C_20170728_A_1603.JPG	2017-07-28 15:36:05	58.55879444	-136.0306222	230	Abundance	0	0	0	0	Good	LFT	2017-08-30	SO-2017.1	0
SO_C_20170728_A_1604.JPG	2017-07-28 15:36:06	58.55879167	-136.0298	230	Abundance	0	0	0	0	Good	LFT	2017-08-30	SO-2017.1	0
SO_C_20170728_A_1605.JPG	2017-07-28 15:36:07	58.55878889	-136.0289778	230	Abundance	0	0	0	0	Good	LFT	2017-08-30	SO-2017.1	0
SO_C_20170728_A_1606.JPG	2017-07-28 15:36:08	58.55879167	-136.0281556	230	Abundance	0	0	0	0	Good	LFT	2017-08-30	SO-2017.1	0
SO_C_20170728_A_1607.JPG	2017-07-28 15:36:09	58.55879444	-136.0273333	230	Abundance	0	0	0	0	Good	LFT	2017-08-30	SO-2017.1	0
SO_C_20170728_A_1608.JPG	2017-07-28 15:36:10	58.5588	-136.0265083	230	Abundance	0	0	0	0	Good	LFT	2017-08-30	SO-2017.1	0
SO_C_20170728_A_1609.JPG	2017-07-28 15:36:11	58.55880556	-136.0256833	230	Abundance	0	0	0	0	Good	LFT	2017-08-30	SO-2017.1	0
SO_C_20170728_A_1610.JPG	2017-07-28 15:36:12	58.55881389	-136.0248583	230	Abundance	0	0	1	0	Good	LFT	2017-08-30	SO-2017.1	0
SO_C_20170728_A_1611.JPG	2017-07-28 15:36:13	58.55882222	-136.0240278	230	Abundance	0	0	1	0	Good	LFT	2017-08-30	SO-2017.1	0
SO_C_20170728_A_1612.JPG	2017-07-28 15:36:14	58.55883056	-136.0232	230	Abundance	0	0	1	1	Good	LFT	2017-08-30	SO-2017.1	0
SO_C_20170728_A_1613.JPG	2017-07-28 15:36:15	58.55884167	-136.0223667	229	Abundance	0	0	0	1	Good	LFT	2017-08-30	SO-2017.1	0
SO_C_20170728_A_1614.JPG	2017-07-28 15:36:16	58.55885	-136.0215306	229	Abundance	0	0	0	1	Good	LFT	2017-08-30	SO-2017.1	0
SO_C_20170728_A_1615.JPG	2017-07-28 15:36:17	58.55886111	-136.0206917	228	Abundance	0	0	0	1	Good	LFT	2017-08-30	SO-2017.1	0
SO_C_20170728_A_1616.JPG	2017-07-28 15:36:18	58.55887222	-136.01985	227	Abundance	0	0	0	1	Good	LFT	2017-08-30	SO-2017.1	0
SO_C_20170728_A_1617.JPG	2017-07-28 15:36:19	58.55888056	-136.0190028	227	Abundance	0	0	1	1	Good	LFT	2017-08-30	SO-2017.1	0
SO_C_20170728_A_1618.JPG	2017-07-28 15:36:20	58.55888611	-136.0181556	225	Abundance	0	0	1	0	Good	LFT	2017-08-30	SO-2017.1	0
SO_C_20170728_A_1619.JPG	2017-07-28 15:36:21	58.55889167	-136.0173028	225	Abundance	0	0	1	0	Good	LFT	2017-08-30	SO-2017.1	0
SO_C_20170728_A_1620.JPG	2017-07-28 15:36:22	58.55889722	-136.0164472	224	Abundance	0	0	0	0	Good	LFT	2017-08-30	SO-2017.1	0
SO_C_20170728_A_1621.JPG	2017-07-28 15:36:23	58.5589	-136.0155917	223	Abundance	0	0	0	0	Good	LFT	2017-08-30	SO-2017.1	0
SO_C_20170728_A_1622.JPG	2017-07-28 15:36:24	58.5589	-136.0147306	223	Abundance	0	0	0	0	Good	LFT	2017-08-30	SO-2017.1	0
SO_C_20170728_A_1623.JPG	2017-07-28 15:36:25	58.55890278	-136.0138722	222	Abundance	0	0	0	0	Good	LFT	2017-08-30	SO-2017.1	0
SO_C_20170728_A_1624.JPG	2017-07-28 15:36:26	58.55890278	-136.0130139	222	Abundance	0	0	0	0	Good	LFT	2017-08-30	SO-2017.1	0
SO_C_20170728_A_1625.JPG	2017-07-28 15:36:27	58.55890556	-136.0121583	222	Abundance	0	0	0	0	Good	LFT	2017-08-30	SO-2017.1	0
SO_C_20170728_A_1626.JPG	2017-07-28 15:36:28	58.55890833	-136.0113056	222	Abundance	0	0	0	0	Good	LFT	2017-08-30	SO-2017.1	0
SO_C_20170728_A_1627.JPG	2017-07-28 15:36:29	58.55891389	-136.0104528	222	Abundance	0	0	0	0	Good	LFT	2017-08-30	SO-2017.1	0
SO_C_20170728_A_1628.JPG	2017-07-28 15:36:30	58.55892222	-136.0096	223	Abundance	0	0	0	0	Good	LFT	2017-08-30	SO-2017.1	0
SO_C_20170728_A_1629.JPG	2017-07-28 15:36:31	58.55893056	-136.0087528	223	Abundance	0	0	0	0	Good	LFT	2017-08-30	SO-2017.1	0
SO_C_20170728_A_1630.JPG	2017-07-28 15:36:32	58.55894444	-136.0079056	223	Abundance	0	0	0	0	Good	LFT	2017-08-30	SO-2017.1	0
SO_C_20170728_A_1631.JPG	2017-07-28 15:36:33	58.55895833	-136.0070639	223	Abundance	0	0	0	0	Good	LFT	2017-08-30	SO-2017.1	0
SO_C_20170728_A_1632.JPG	2017-07-28 15:36:34	58.558975	-136.0062222	223	Abundance	0	0	0	0	Good	LFT	2017-08-30	SO-2017.1	0
SO_C_20170728_A_1633.JPG	2017-07-28 15:36:35	58.55899167	-136.0053833	224	Abundance	0	0	0	0	Good	LFT	2017-08-30	SO-2017.1	0
SO_C_20170728_A_1634.JPG	2017-07-28 15:36:36	58.55901111	-136.0045472	224	Abundance	0	0	0	0	Good	LFT	2017-08-30	SO-2017.1	0
SO_C_20170728_A_1635.JPG	2017-07-28 15:36:37	58.55903333	-136.0037139	224	Abundance	0	0	0	0	Good	LFT	2017-08-30	SO-2017.1	0
SO_C_20170728_A_1636.JPG	2017-07-28 15:36:38	58.55905556	-136.0028833	224	Abundance	0	0	0	0	Good	LFT	2017-08-30	SO-2017.1	0
SO_C_20170728_A_1637.JPG	2017-07-28 15:36:39	58.55907778	-136.0020528	224	Abundance	0	0	0	0	Good	LFT	2017-08-30	SO-2017.1	0
SO_C_20170728_A_1638.JPG	2017-07-28 15:36:40	58.55910278	-136.001225	224	Abundance	0	0	0	0	Good	LFT	2017-08-30	SO-2017.1	0
SO_C_20170728_A_1639.JPG	2017-07-28 15:36:41	58.559125	-136.0003944	224	Abundance	0	0	0	0	Good	LFT	2017-08-30	SO-2017.1	0
SO_C_20170728_A_1640.JPG	2017-07-28 15:36:42	58.55914722	-135.9995667	223	Abundance	0	0	1	0	Good	LFT	2017-08-30	SO-2017.1	0
SO_C_20170728_A_1641.JPG	2017-07-28 15:36:43	58.55916944	-135.9987361	223	Abundance	0	0	1	0	Good	LFT	2017-08-30	SO-2017.1	0
SO_C_20170728_A_1642.JPG	2017-07-28 15:36:44	58.55918889	-135.9979083	223	Abundance	0	0	0	0	Good	LFT	2017-08-30	SO-2017.1	0
SO_C_20170728_A_1643.JPG	2017-07-28 15:36:45	58.55920556	-135.9970806	223	Abundance	0	0	0	0	Good	LFT	2017-08-30	SO-2017.1	0
SO_C_20170728_A_1644.JPG	2017-07-28 15:36:46	58.55922222	-135.9962528	222	Abundance	0	0	0	0	Good	LFT	2017-08-30	SO-2017.1	0
SO_C_20170728_A_1645.JPG	2017-07-28 15:36:47	58.55923333	-135.9954222	222	Abundance	0	0	0	0	Good	LFT	2017-08-30	SO-2017.1	0
SO_C_20170728_A_1646.JPG	2017-07-28 15:36:48	58.55924444	-135.9945944	222	Abundance	0	0	0	0	Good	LFT	2017-08-30	SO-2017.1	0
SO_C_20170728_A_1647.JPG	2017-07-28 15:36:49	58.55925278	-135.9937667	222	Abundance	0	0	0	0	Good	LFT	2017-08-30	SO-2017.1	0
SO_C_20170728_A_1648.JPG	2017-07-28 15:38:05	58.56218333	-135.9927083	218	Abundance	0	0	0	0	Good	LFT	2017-08-30	SO-2017.1	0
SO_C_20170728_A_1649.JPG	2017-07-28 15:38:06	58.56212778	-135.9935111	219	Abundance	0	0	1	0	Good	LFT	2017-08-30	SO-2017.1	0
SO_C_20170728_A_1650.JPG	2017-07-28 15:38:07	58.56209444	-135.9943167	219	Abundance	0	0	1	0	Good	LFT	2017-08-30	SO-2017.1	0
SO_C_20170728_A_1651.JPG	2017-07-28 15:38:08	58.56208611	-135.9951194	220	Abundance	0	0	0	0	Good	LFT	2017-08-30	SO-2017.1	0
SO_C_20170728_A_1652.JPG	2017-07-28 15:38:09	58.56209444	-135.9959222	220	Abundance	0	0	1	0	Good	LFT	2017-08-30	SO-2017.1	0
SO_C_20170728_A_1653.JPG	2017-07-28 15:38:10	58.56212222	-135.9967194	220	Abundance	0	0	1	0	Good	LFT	2017-08-30	SO-2017.1	0
SO_C_20170728_A_1654.JPG	2017-07-28 15:38:11	58.56216389	-135.9975139	220	Abundance	0	0	0	0	Good	LFT	2017-08-30	SO-2017.1	0
SO_C_20170728_A_1655.JPG	2017-07-28 15:38:12	58.56221389	-135.9983028	221	Abundance	0	0	0	0	Good	LFT	2017-08-30	SO-2017.1	0
SO_C_20170728_A_1656.JPG	2017-07-28 15:38:13	58.56226944	-135.9990889	222	Abundance	0	0	0	0	Good	LFT	2017-08-30	SO-2017.1	0
SO_C_20170728_A_1657.JPG	2017-07-28 15:38:14	58.56232778	-135.9998694	223	Abundance	0	0	0	0	Good	LFT	2017-08-30	SO-2017.1	0
SO_C_20170728_A_1658.JPG	2017-07-28 15:38:15	58.56238611	-136.00065	225	Abundance	0	0	0	0	Good	LFT	2017-08-30	SO-2017.1	0
SO_C_20170728_A_1659.JPG	2017-07-28 15:38:16	58.56244444	-136.0014278	225	Abundance	0	0	0	0	Good	LFT	2017-08-30	SO-2017.1	0
SO_C_20170728_A_1660.JPG	2017-07-28 15:38:17	58.56249722	-136.0022056	226	Abundance	0	0	0	0	Good	LFT	2017-08-30	SO-2017.1	0
SO_C_20170728_A_1661.JPG	2017-07-28 15:38:18	58.56254722	-136.0029833	226	Abundance	0	0	0	0	Good	LFT	2017-08-30	SO-2017.1	0
SO_C_20170728_A_1662.JPG	2017-07-28 15:38:19	58.56259167	-136.0037639	227	Abundance	0	0	0	0	Good	LFT	2017-08-30	SO-2017.1	0
SO_C_20170728_A_1663.JPG	2017-07-28 15:38:20	58.56263333	-136.0045444	227	Abundance	0	0	0	0	Good	LFT	2017-08-30	SO-2017.1	0
SO_C_20170728_A_1664.JPG	2017-07-28 15:38:21	58.56266667	-136.0053306	227	Abundance	0	0	0	0	Good	LFT	2017-08-30	SO-2017.1	0
SO_C_20170728_A_1665.JPG	2017-07-28 15:38:22	58.56268889	-136.0061194	227	Abundance	0	0	0	0	Good	LFT	2017-08-30	SO-2017.1	0
SO_C_20170728_A_1666.JPG	2017-07-28 15:38:23	58.56270278	-136.0069111	226	Abundance	0	0	0	0	Good	LFT	2017-08-30	SO-2017.1	0
SO_C_20170728_A_1667.JPG	2017-07-28 15:38:24	58.56271111	-136.0077083	226	Abundance	0	0	0	0	Good	LFT	2017-08-30	SO-2017.1	0
SO_C_20170728_A_1668.JPG	2017-07-28 15:38:25	58.56271389	-136.0085111	225	Abundance	0	0	0	0	Good	LFT	2017-08-30	SO-2017.1	0
SO_C_20170728_A_1669.JPG	2017-07-28 15:38:26	58.56271111	-136.0093139	224	Abundance	0	0	1	0	Good	LFT	2017-08-30	SO-2017.1	0
SO_C_20170728_A_1670.JPG	2017-07-28 15:38:27	58.5627	-136.0101194	224	Abundance	0	0	1	0	Good	LFT	2017-08-30	SO-2017.1	0
SO_C_20170728_A_1671.JPG	2017-07-28 15:38:28	58.56268333	-136.0109278	223	Abundance	0	0	1	0	Good	LFT	2017-08-30	SO-2017.1	0
SO_C_20170728_A_1672.JPG	2017-07-28 15:38:29	58.56266389	-136.0117361	223	Abundance	0	0	0	0	Good	LFT	2017-08-30	SO-2017.1	0
SO_C_20170728_A_1673.JPG	2017-07-28 15:38:30	58.56263611	-136.0125417	223	Abundance	0	0	1	0	Good	LFT	2017-08-30	SO-2017.1	0
SO_C_20170728_A_1674.JPG	2017-07-28 15:38:31	58.56260833	-136.01335	224	Abundance	0	0	1	0	Good	LFT	2017-08-30	SO-2017.1	0
SO_C_20170728_A_1675.JPG	2017-07-28 15:38:32	58.56258056	-136.0141556	225	Abundance	0	0	0	0	Good	LFT	2017-08-30	SO-2017.1	0
SO_C_20170728_A_1676.JPG	2017-07-28 15:38:33	58.56255	-136.0149583	225	Abundance	0	0	1	0	Good	LFT	2017-08-30	SO-2017.1	0
SO_C_20170728_A_1677.JPG	2017-07-28 15:38:34	58.56251944	-136.0157611	226	Abundance	0	0	0	0	Good	LFT	2017-08-30	SO-2017.1	0
SO_C_20170728_A_1678.JPG	2017-07-28 15:38:35	58.56248889	-136.0165639	226	Abundance	0	0	0	0	Good	LFT	2017-08-30	SO-2017.1	0
SO_C_20170728_A_1679.JPG	2017-07-28 15:38:36	58.56246111	-136.0173639	227	Abundance	0	0	1	0	Good	LFT	2017-08-30	SO-2017.1	0
SO_C_20170728_A_1680.JPG	2017-07-28 15:38:37	58.56243056	-136.0181667	227	Abundance	0	0	1	0	Good	LFT	2017-08-30	SO-2017.1	0
SO_C_20170728_A_1681.JPG	2017-07-28 15:38:38	58.56240278	-136.0189667	228	Abundance	0	0	1	1	Good	LFT	2017-08-30	SO-2017.1	0
SO_C_20170728_A_1682.JPG	2017-07-28 15:38:39	58.56238056	-136.0197722	229	Abundance	0	0	1	1	Good	LFT	2017-08-30	SO-2017.1	0
SO_C_20170728_A_1683.JPG	2017-07-28 15:38:40	58.56236389	-136.0205778	228	Abundance	0	0	1	1	Good	LFT	2017-08-30	SO-2017.1	0
SO_C_20170728_A_1684.JPG	2017-07-28 15:38:41	58.56235	-136.0213889	228	Abundance	0	0	1	0	Good	LFT	2017-08-30	SO-2017.1	0
SO_C_20170728_A_1685.JPG	2017-07-28 15:38:42	58.56234167	-136.0222028	228	Abundance	0	0	1	0	Good	LFT	2017-08-30	SO-2017.1	0
SO_C_20170728_A_1686.JPG	2017-07-28 15:38:43	58.56233611	-136.0230194	227	Abundance	0	0	0	0	Good	LFT	2017-08-30	SO-2017.1	0
SO_C_20170728_A_1687.JPG	2017-07-28 15:38:44	58.56233056	-136.0238389	226	Abundance	0	0	0	0	Good	LFT	2017-08-30	SO-2017.1	0
SO_C_20170728_A_1688.JPG	2017-07-28 15:38:45	58.56232778	-136.0246639	226	Abundance	0	0	0	0	Good	LFT	2017-08-30	SO-2017.1	0
SO_C_20170728_A_1689.JPG	2017-07-28 15:38:46	58.56232222	-136.0254889	225	Abundance	0	0	0	0	Good	LFT	2017-08-30	SO-2017.1	0
SO_C_20170728_A_1690.JPG	2017-07-28 15:38:47	58.56231944	-136.0263194	225	Abundance	0	0	1	0	Good	LFT	2017-08-30	SO-2017.1	0
SO_C_20170728_A_1691.JPG	2017-07-28 15:38:48	58.56231667	-136.02715	225	Abundance	0	0	0	0	Good	LFT	2017-08-30	SO-2017.1	0
SO_C_20170728_A_1692.JPG	2017-07-28 15:38:49	58.56231667	-136.0279806	225	Abundance	0	0	0	0	Good	LFT	2017-08-30	SO-2017.1	0
SO_C_20170728_A_1693.JPG	2017-07-28 15:38:50	58.56231667	-136.0288083	225	Abundance	0	0	0	0	Good	LFT	2017-08-30	SO-2017.1	0
SO_C_20170728_A_1694.JPG	2017-07-28 15:38:51	58.56231944	-136.0296361	226	Abundance	0	0	0	0	Good	LFT	2017-08-30	SO-2017.1	0
SO_C_20170728_A_1695.JPG	2017-07-28 15:38:52	58.56232222	-136.0304583	227	Abundance	0	0	0	0	Good	LFT	2017-08-30	SO-2017.1	0
SO_C_20170728_A_1696.JPG	2017-07-28 15:38:53	58.562325	-136.0312778	228	Abundance	0	0	0	0	Good	LFT	2017-08-30	SO-2017.1	0
SO_C_20170728_A_1697.JPG	2017-07-28 15:38:54	58.56233056	-136.0320917	229	Abundance	0	0	0	0	Good	LFT	2017-08-30	SO-2017.1	0
SO_C_20170728_A_1698.JPG	2017-07-28 15:38:55	58.56233611	-136.0329028	230	Abundance	0	0	0	0	Good	LFT	2017-08-30	SO-2017.1	0
SO_C_20170728_A_1699.JPG	2017-07-28 15:38:56	58.56234444	-136.0337083	232	Abundance	0	0	0	0	Good	LFT	2017-08-30	SO-2017.1	0
SO_C_20170728_A_1700.JPG	2017-07-28 15:38:57	58.56235278	-136.0345083	234	Abundance	0	0	0	0	Good	LFT	2017-08-30	SO-2017.1	0
SO_C_20170728_A_1701.JPG	2017-07-28 15:38:58	58.56236111	-136.0353111	234	Abundance	0	0	0	0	Good	LFT	2017-08-31	SO-2017.1	0
SO_C_20170728_A_1702.JPG	2017-07-28 15:38:59	58.56236944	-136.0361139	234	Abundance	0	0	0	0	Good	LFT	2017-08-31	SO-2017.1	0
SO_C_20170728_A_1703.JPG	2017-07-28 15:39:00	58.56237778	-136.0369194	234	Abundance	0	0	0	0	Good	LFT	2017-08-31	SO-2017.1	0
SO_C_20170728_A_1704.JPG	2017-07-28 15:39:01	58.56238611	-136.0377306	234	Abundance	0	0	0	0	Good	LFT	2017-08-31	SO-2017.1	0
SO_C_20170728_A_1705.JPG	2017-07-28 15:39:02	58.56239444	-136.0385444	233	Abundance	0	0	0	0	Good	LFT	2017-08-31	SO-2017.1	0
SO_C_20170728_A_1706.JPG	2017-07-28 15:39:03	58.5624	-136.0393639	233	Abundance	0	0	0	0	Good	LFT	2017-08-31	SO-2017.1	0
SO_C_20170728_A_1707.JPG	2017-07-28 15:39:04	58.56240556	-136.0401917	231	Abundance	0	0	0	0	Good	LFT	2017-08-31	SO-2017.1	0
SO_C_20170728_A_1708.JPG	2017-07-28 15:39:05	58.56240556	-136.0410222	230	Abundance	0	0	0	0	Good	LFT	2017-08-31	SO-2017.1	0
SO_C_20170728_A_1709.JPG	2017-07-28 15:39:06	58.56240556	-136.0418583	229	Abundance	0	0	0	0	Good	LFT	2017-08-31	SO-2017.1	0
SO_C_20170728_A_1710.JPG	2017-07-28 15:39:07	58.56240278	-136.0427	229	Abundance	0	0	0	0	Good	LFT	2017-08-31	SO-2017.1	0
SO_C_20170728_A_1711.JPG	2017-07-28 15:39:08	58.56239722	-136.0435444	227	Abundance	0	0	0	0	Good	LFT	2017-08-31	SO-2017.1	0
SO_C_20170728_A_1712.JPG	2017-07-28 15:39:09	58.56238889	-136.0443944	226	Abundance	0	0	0	0	Good	LFT	2017-08-31	SO-2017.1	0
SO_C_20170728_A_1713.JPG	2017-07-28 15:39:10	58.56237778	-136.0452417	226	Abundance	0	0	0	0	Good	LFT	2017-08-31	SO-2017.1	0
SO_C_20170728_A_1714.JPG	2017-07-28 15:39:11	58.56236389	-136.0460889	226	Abundance	0	0	0	0	Good	LFT	2017-08-31	SO-2017.1	0
SO_C_20170728_A_1715.JPG	2017-07-28 15:39:12	58.56235278	-136.0469361	226	Abundance	0	0	0	0	Good	LFT	2017-08-31	SO-2017.1	0
SO_C_20170728_A_1716.JPG	2017-07-28 15:39:13	58.56233889	-136.0477778	227	Abundance	0	0	0	0	Good	LFT	2017-08-31	SO-2017.1	0
SO_C_20170728_A_1717.JPG	2017-07-28 15:39:14	58.562325	-136.0486194	228	Abundance	0	0	0	0	Good	LFT	2017-08-31	SO-2017.1	0
SO_C_20170728_A_1718.JPG	2017-07-28 15:39:15	58.56231111	-136.0494556	229	Abundance	0	0	0	0	Good	LFT	2017-08-31	SO-2017.1	0
SO_C_20170728_A_1719.JPG	2017-07-28 15:39:16	58.56229722	-136.0502889	230	Abundance	0	0	0	0	Good	LFT	2017-08-31	SO-2017.1	0
SO_C_20170728_A_1720.JPG	2017-07-28 15:39:17	58.56228611	-136.0511194	232	Abundance	0	0	0	0	Good	LFT	2017-08-31	SO-2017.1	0
SO_C_20170728_A_1721.JPG	2017-07-28 15:39:18	58.562275	-136.05195	232	Abundance	0	0	0	0	Good	LFT	2017-08-31	SO-2017.1	0
SO_C_20170728_A_1722.JPG	2017-07-28 15:39:19	58.56226667	-136.0527778	232	Abundance	0	0	0	0	Good	LFT	2017-08-31	SO-2017.1	0
SO_C_20170728_A_1723.JPG	2017-07-28 15:39:20	58.56225833	-136.0536056	232	Abundance	0	0	0	0	Good	LFT	2017-08-31	SO-2017.1	0
SO_C_20170728_A_1724.JPG	2017-07-28 15:39:21	58.56225278	-136.0544333	232	Abundance	0	0	0	0	Good	LFT	2017-08-31	SO-2017.1	0
SO_C_20170728_A_1725.JPG	2017-07-28 15:39:22	58.56224722	-136.0552611	232	Abundance	0	0	0	0	Good	LFT	2017-08-31	SO-2017.1	0
SO_C_20170728_A_1726.JPG	2017-07-28 15:39:23	58.56224167	-136.0560889	232	Abundance	0	0	1	0	Good	LFT	2017-08-31	SO-2017.1	0
SO_C_20170728_A_1727.JPG	2017-07-28 15:39:24	58.56224167	-136.0569167	233	Abundance	0	0	1	0	Good	LFT	2017-08-31	SO-2017.1	0
SO_C_20170728_A_1728.JPG	2017-07-28 15:39:25	58.56224444	-136.0577417	233	Abundance	0	0	0	0	Good	LFT	2017-08-31	SO-2017.1	0
SO_C_20170728_A_1729.JPG	2017-07-28 15:39:26	58.56224722	-136.0585667	234	Abundance	0	0	0	0	Good	LFT	2017-08-31	SO-2017.1	0
SO_C_20170728_A_1730.JPG	2017-07-28 15:39:27	58.56225278	-136.0593889	234	Abundance	0	0	0	0	Good	LFT	2017-08-31	SO-2017.1	0
SO_C_20170728_A_1731.JPG	2017-07-28 15:39:28	58.56225556	-136.0602111	235	Abundance	0	0	0	0	Good	LFT	2017-08-31	SO-2017.1	0
SO_C_20170728_A_1732.JPG	2017-07-28 15:39:29	58.56225833	-136.0610361	236	Abundance	0	0	0	0	Good	LFT	2017-08-31	SO-2017.1	0
SO_C_20170728_A_1733.JPG	2017-07-28 15:39:30	58.56225833	-136.0618583	236	Abundance	0	0	0	0	Good	LFT	2017-08-31	SO-2017.1	0
SO_C_20170728_A_1734.JPG	2017-07-28 15:39:31	58.56225556	-136.0626833	237	Abundance	0	0	0	0	Good	LFT	2017-08-31	SO-2017.1	0
SO_C_20170728_A_1735.JPG	2017-07-28 15:39:32	58.56225	-136.0635083	236	Abundance	0	0	0	0	Good	LFT	2017-08-31	SO-2017.1	0
SO_C_20170728_A_1736.JPG	2017-07-28 15:39:33	58.56223611	-136.0643361	237	Abundance	0	0	0	0	Good	LFT	2017-08-31	SO-2017.1	0
SO_C_20170728_A_1737.JPG	2017-07-28 15:39:34	58.562225	-136.0651694	236	Abundance	0	0	0	0	Good	LFT	2017-08-31	SO-2017.1	0
SO_C_20170728_A_1738.JPG	2017-07-28 15:39:35	58.56220833	-136.0660028	235	Abundance	0	0	0	0	Good	LFT	2017-08-31	SO-2017.1	0
SO_C_20170728_A_1739.JPG	2017-07-28 15:39:36	58.56219167	-136.0668389	234	Abundance	0	0	0	0	Good	LFT	2017-08-31	SO-2017.1	0
SO_C_20170728_A_1740.JPG	2017-07-28 15:39:37	58.56217222	-136.0676778	234	Abundance	0	0	0	0	Good	LFT	2017-08-31	SO-2017.1	0
SO_C_20170728_A_1741.JPG	2017-07-28 15:39:38	58.56215556	-136.0685167	234	Abundance	0	0	0	0	Good	LFT	2017-08-31	SO-2017.1	0
SO_C_20170728_A_1742.JPG	2017-07-28 15:39:39	58.56214167	-136.0693583	234	Abundance	0	0	0	0	Good	LFT	2017-08-31	SO-2017.1	0
SO_C_20170728_A_1743.JPG	2017-07-28 15:39:40	58.562125	-136.0702028	234	Abundance	0	0	0	0	Good	LFT	2017-08-31	SO-2017.1	0
SO_C_20170728_A_1744.JPG	2017-07-28 15:39:41	58.56211111	-136.0710472	234	Abundance	0	0	0	0	Good	LFT	2017-08-31	SO-2017.1	0
SO_C_20170728_A_1745.JPG	2017-07-28 15:39:42	58.56209722	-136.0718917	234	Abundance	0	0	0	0	Good	LFT	2017-08-31	SO-2017.1	0
SO_C_20170728_A_1746.JPG	2017-07-28 15:39:43	58.56208056	-136.0727389	233	Abundance	0	0	0	0	Good	LFT	2017-08-31	SO-2017.1	0
SO_C_20170728_A_1747.JPG	2017-07-28 15:39:44	58.56206389	-136.0735917	233	Abundance	0	0	0	0	Good	LFT	2017-08-31	SO-2017.1	0
SO_C_20170728_A_1748.JPG	2017-07-28 15:39:45	58.56204722	-136.0744417	232	Abundance	0	0	0	0	Good	LFT	2017-08-31	SO-2017.1	0
SO_C_20170728_A_1749.JPG	2017-07-28 15:39:46	58.56202778	-136.0752944	232	Abundance	0	0	0	0	Good	LFT	2017-08-31	SO-2017.1	0
SO_C_20170728_A_1750.JPG	2017-07-28 15:39:47	58.56200278	-136.07615	232	Abundance	0	0	0	0	Good	LFT	2017-08-31	SO-2017.1	0
SO_C_20170728_A_1751.JPG	2017-07-28 15:39:48	58.56197778	-136.0770056	232	Abundance	0	0	1	0	Good	LFT	2017-08-31	SO-2017.1	0
SO_C_20170728_A_1752.JPG	2017-07-28 15:39:49	58.56195	-136.0778611	231	Abundance	0	0	0	0	Good	LFT	2017-08-31	SO-2017.1	0
SO_C_20170728_A_1753.JPG	2017-07-28 15:39:50	58.56193056	-136.0787194	231	Abundance	0	0	1	0	Good	LFT	2017-08-31	SO-2017.1	0
SO_C_20170728_A_1754.JPG	2017-07-28 15:39:51	58.56190833	-136.0795778	232	Abundance	0	0	0	0	Good	LFT	2017-08-31	SO-2017.1	0
SO_C_20170728_A_1755.JPG	2017-07-28 15:39:52	58.56188889	-136.0804361	232	Abundance	0	0	0	0	Good	LFT	2017-08-31	SO-2017.1	0
SO_C_20170728_A_1756.JPG	2017-07-28 15:39:53	58.561875	-136.0812972	231	Abundance	0	0	0	0	Good	LFT	2017-08-31	SO-2017.1	0
SO_C_20170728_A_1757.JPG	2017-07-28 15:39:54	58.56186667	-136.0821583	230	Abundance	0	0	0	0	Good	LFT	2017-08-31	SO-2017.1	0
SO_C_20170728_A_1758.JPG	2017-07-28 15:39:55	58.56186111	-136.0830222	230	Abundance	0	0	0	0	Good	LFT	2017-08-31	SO-2017.1	0
SO_C_20170728_A_1759.JPG	2017-07-28 15:39:56	58.56186111	-136.0838861	229	Abundance	0	0	0	0	Good	LFT	2017-08-31	SO-2017.1	0
SO_C_20170728_A_1760.JPG	2017-07-28 15:39:57	58.56185833	-136.08475	228	Abundance	0	0	0	0	Good	LFT	2017-08-31	SO-2017.1	0
SO_C_20170728_A_1761.JPG	2017-07-28 15:39:58	58.56186389	-136.0856111	229	Abundance	0	0	0	0	Good	LFT	2017-08-31	SO-2017.1	0
SO_C_20170728_A_1762.JPG	2017-07-28 15:39:59	58.56187222	-136.086475	229	Abundance	0	0	0	0	Good	LFT	2017-08-31	SO-2017.1	0
SO_C_20170728_A_1763.JPG	2017-07-28 15:40:00	58.56188056	-136.0873333	229	Abundance	0	0	0	0	Good	LFT	2017-08-31	SO-2017.1	0
SO_C_20170728_A_1764.JPG	2017-07-28 15:40:01	58.56188889	-136.0881944	229	Abundance	0	0	0	0	Good	LFT	2017-08-31	SO-2017.1	0
SO_C_20170728_A_1765.JPG	2017-07-28 15:40:02	58.5619	-136.0890528	229	Abundance	0	0	0	0	Good	LFT	2017-08-31	SO-2017.1	0
SO_C_20170728_A_1766.JPG	2017-07-28 15:40:03	58.56191389	-136.0899083	229	Abundance	0	0	0	0	Good	LFT	2017-08-31	SO-2017.1	0
SO_C_20170728_A_1767.JPG	2017-07-28 15:40:04	58.561925	-136.0907667	229	Abundance	0	0	1	0	Good	LFT	2017-08-31	SO-2017.1	0
SO_C_20170728_A_1768.JPG	2017-07-28 15:40:05	58.56193889	-136.0916222	229	Abundance	0	0	1	0	Good	LFT	2017-08-31	SO-2017.1	0
SO_C_20170728_A_1769.JPG	2017-07-28 15:40:06	58.56195556	-136.0924778	229	Abundance	0	0	1	1	Good	LFT	2017-08-31	SO-2017.1	0
SO_C_20170728_A_1770.JPG	2017-07-28 15:40:07	58.56197222	-136.0933333	229	Abundance	0	0	1	1	Good	LFT	2017-08-31	SO-2017.1	0
SO_C_20170728_A_1771.JPG	2017-07-28 15:40:08	58.56199167	-136.0941861	229	Abundance	0	0	0	1	Good	LFT	2017-08-31	SO-2017.1	0
SO_C_20170728_A_1772.JPG	2017-07-28 15:40:09	58.56201111	-136.0950389	230	Abundance	0	0	0	1	Good	LFT	2017-08-31	SO-2017.1	0
SO_C_20170728_A_1773.JPG	2017-07-28 15:42:05	58.56426944	-136.1009722	232	Abundance	0	0	0	1	Good	LFT	2017-08-31	SO-2017.1	0
SO_C_20170728_A_1774.JPG	2017-07-28 15:42:06	58.56430556	-136.100125	232	Abundance	0	0	0	1	Good	LFT	2017-08-31	SO-2017.1	0
SO_C_20170728_A_1775.JPG	2017-07-28 15:42:07	58.56435556	-136.0992778	232	Abundance	0	0	0	1	Good	LFT	2017-08-31	SO-2017.1	0
SO_C_20170728_A_1776.JPG	2017-07-28 15:42:08	58.56441111	-136.0984306	231	Abundance	0	0	0	1	Good	LFT	2017-08-31	SO-2017.1	0
SO_C_20170728_A_1777.JPG	2017-07-28 15:42:09	58.564475	-136.0975833	230	Abundance	0	0	0	1	Good	LFT	2017-08-31	SO-2017.1	0
SO_C_20170728_A_1778.JPG	2017-07-28 15:42:10	58.56454722	-136.0967389	229	Abundance	0	0	0	1	Good	LFT	2017-08-31	SO-2017.1	0
SO_C_20170728_A_1779.JPG	2017-07-28 15:42:11	58.564625	-136.0959	229	Abundance	0	0	1	1	Good	LFT	2017-08-31	SO-2017.1	0
SO_C_20170728_A_1780.JPG	2017-07-28 15:42:12	58.56471389	-136.0950583	227	Abundance	0	0	1	1	Good	LFT	2017-08-31	SO-2017.1	0
SO_C_20170728_A_1781.JPG	2017-07-28 15:42:13	58.56480556	-136.0942167	227	Abundance	0	0	1	1	Good	LFT	2017-08-31	SO-2017.1	0
SO_C_20170728_A_1782.JPG	2017-07-28 15:42:14	58.56489167	-136.0933722	226	Abundance	0	0	1	0	Good	LFT	2017-08-31	SO-2017.1	0
SO_C_20170728_A_1783.JPG	2017-07-28 15:42:15	58.56497222	-136.092525	226	Abundance	0	0	0	0	Good	LFT	2017-08-31	SO-2017.1	0
SO_C_20170728_A_1784.JPG	2017-07-28 15:42:16	58.56503889	-136.0916722	226	Abundance	0	0	0	0	Good	LFT	2017-08-31	SO-2017.1	0
SO_C_20170728_A_1785.JPG	2017-07-28 15:42:17	58.56509167	-136.0908194	225	Abundance	0	0	0	0	Good	LFT	2017-08-31	SO-2017.1	0
SO_C_20170728_A_1786.JPG	2017-07-28 15:42:18	58.56513056	-136.0899611	224	Abundance	0	0	0	0	Good	LFT	2017-08-31	SO-2017.1	0
SO_C_20170728_A_1787.JPG	2017-07-28 15:42:19	58.56515556	-136.0891	224	Abundance	0	0	1	0	Good	LFT	2017-08-31	SO-2017.1	0
SO_C_20170728_A_1788.JPG	2017-07-28 15:42:20	58.56516389	-136.0882389	223	Abundance	0	0	1	0	Good	LFT	2017-08-31	SO-2017.1	0
SO_C_20170728_A_1789.JPG	2017-07-28 15:42:21	58.56516667	-136.087375	222	Abundance	0	0	0	0	Good	LFT	2017-08-31	SO-2017.1	0
SO_C_20170728_A_1790.JPG	2017-07-28 15:42:22	58.56516667	-136.0865139	222	Abundance	0	0	0	0	Good	LFT	2017-08-31	SO-2017.1	0
SO_C_20170728_A_1791.JPG	2017-07-28 15:42:23	58.56516944	-136.0856528	221	Abundance	0	0	0	0	Good	LFT	2017-08-31	SO-2017.1	0
SO_C_20170728_A_1792.JPG	2017-07-28 15:42:24	58.565175	-136.0847917	221	Abundance	0	0	1	0	Good	LFT	2017-08-31	SO-2017.1	0
SO_C_20170728_A_1793.JPG	2017-07-28 15:42:25	58.56518056	-136.0839278	220	Abundance	0	0	0	0	Good	LFT	2017-08-31	SO-2017.1	0
SO_C_20170728_A_1794.JPG	2017-07-28 15:42:26	58.56518889	-136.0830639	219	Abundance	0	0	0	0	Good	LFT	2017-08-31	SO-2017.1	0
SO_C_20170728_A_1795.JPG	2017-07-28 15:42:27	58.5652	-136.0822056	220	Abundance	0	0	0	0	Good	LFT	2017-08-31	SO-2017.1	0
SO_C_20170728_A_1796.JPG	2017-07-28 15:42:28	58.56521389	-136.0813472	220	Abundance	0	0	1	0	Good	LFT	2017-08-31	SO-2017.1	0
SO_C_20170728_A_1797.JPG	2017-07-28 15:42:29	58.56522778	-136.0804944	221	Abundance	0	0	1	0	Good	LFT	2017-08-31	SO-2017.1	0
SO_C_20170728_A_1798.JPG	2017-07-28 15:42:30	58.56523889	-136.0796417	221	Abundance	0	0	0	0	Good	LFT	2017-08-31	SO-2017.1	0
SO_C_20170728_A_1799.JPG	2017-07-28 15:42:31	58.56525278	-136.0787944	222	Abundance	0	0	0	0	Good	LFT	2017-08-31	SO-2017.1	0
SO_C_20170728_A_1800.JPG	2017-07-28 15:42:32	58.56526667	-136.07795	223	Abundance	0	0	0	0	Good	LFT	2017-08-31	SO-2017.1	0
SO_C_20170728_A_1801.JPG	2017-07-28 15:42:33	58.56528611	-136.0771111	224	Abundance	0	0	0	0	Good	LFT	2017-08-31	SO-2017.1	0
SO_C_20170728_A_1802.JPG	2017-07-28 15:42:34	58.56530833	-136.0762722	224	Abundance	0	0	0	0	Good	LFT	2017-08-31	SO-2017.1	0
SO_C_20170728_A_1803.JPG	2017-07-28 15:42:35	58.56533333	-136.0754389	225	Abundance	0	0	0	0	Good	LFT	2017-08-31	SO-2017.1	0
SO_C_20170728_A_1804.JPG	2017-07-28 15:42:36	58.56536111	-136.0746056	225	Abundance	0	0	0	0	Good	LFT	2017-08-31	SO-2017.1	0
SO_C_20170728_A_1805.JPG	2017-07-28 15:42:37	58.56539167	-136.0737722	225	Abundance	0	0	0	0	Good	LFT	2017-08-31	SO-2017.1	0
SO_C_20170728_A_1806.JPG	2017-07-28 15:42:38	58.56542222	-136.0729361	225	Abundance	0	0	0	0	Good	LFT	2017-08-31	SO-2017.1	0
SO_C_20170728_A_1807.JPG	2017-07-28 15:42:39	58.56545278	-136.0721056	225	Abundance	0	0	0	0	Good	LFT	2017-08-31	SO-2017.1	0
SO_C_20170728_A_1808.JPG	2017-07-28 15:42:40	58.56548056	-136.0712694	225	Abundance	0	0	0	0	Good	LFT	2017-08-31	SO-2017.1	0
SO_C_20170728_A_1809.JPG	2017-07-28 15:42:41	58.56550833	-136.0704389	225	Abundance	0	0	0	0	Good	LFT	2017-08-31	SO-2017.1	0
SO_C_20170728_A_1810.JPG	2017-07-28 15:42:42	58.56553611	-136.0696056	226	Abundance	0	0	0	0	Good	LFT	2017-08-31	SO-2017.1	0
SO_C_20170728_A_1811.JPG	2017-07-28 15:42:43	58.56556111	-136.068775	226	Abundance	0	0	0	0	Good	LFT	2017-08-31	SO-2017.1	0
SO_C_20170728_A_1812.JPG	2017-07-28 15:42:44	58.56558333	-136.0679417	227	Abundance	0	0	0	0	Good	LFT	2017-08-31	SO-2017.1	0
SO_C_20170728_A_1813.JPG	2017-07-28 15:42:45	58.56560278	-136.0671056	226	Abundance	0	0	0	0	Good	LFT	2017-08-31	SO-2017.1	0
SO_C_20170728_A_1814.JPG	2017-07-28 15:42:46	58.56561944	-136.0662667	226	Abundance	0	0	0	0	Good	LFT	2017-08-31	SO-2017.1	0
SO_C_20170728_A_1815.JPG	2017-07-28 15:42:47	58.56563333	-136.0654306	226	Abundance	0	0	0	0	Good	LFT	2017-08-31	SO-2017.1	0
SO_C_20170728_A_1816.JPG	2017-07-28 15:42:48	58.56564722	-136.0645944	227	Abundance	0	0	0	0	Good	LFT	2017-08-31	SO-2017.1	0
SO_C_20170728_A_1817.JPG	2017-07-28 15:42:49	58.56565833	-136.0637583	227	Abundance	0	0	0	0	Good	LFT	2017-08-31	SO-2017.1	0
SO_C_20170728_A_1818.JPG	2017-07-28 15:42:50	58.56566944	-136.062925	227	Abundance	0	0	1	0	Good	LFT	2017-08-31	SO-2017.1	0
SO_C_20170728_A_1819.JPG	2017-07-28 15:42:51	58.56567778	-136.0620917	227	Abundance	0	0	0	0	Good	LFT	2017-08-31	SO-2017.1	0
SO_C_20170728_A_1820.JPG	2017-07-28 15:42:52	58.56568889	-136.0612611	228	Abundance	0	0	0	0	Good	LFT	2017-08-31	SO-2017.1	0
SO_C_20170728_A_1821.JPG	2017-07-28 15:42:53	58.5657	-136.0604333	229	Abundance	0	0	0	0	Good	LFT	2017-08-31	SO-2017.1	0
SO_C_20170728_A_1822.JPG	2017-07-28 15:42:54	58.56571111	-136.0596028	229	Abundance	0	0	0	0	Good	LFT	2017-08-31	SO-2017.1	0
SO_C_20170728_A_1823.JPG	2017-07-28 15:42:55	58.565725	-136.058775	230	Abundance	0	0	0	0	Good	LFT	2017-08-31	SO-2017.1	0
SO_C_20170728_A_1824.JPG	2017-07-28 15:42:56	58.56573889	-136.0579444	229	Abundance	0	0	0	0	Good	LFT	2017-08-31	SO-2017.1	0
SO_C_20170728_A_1825.JPG	2017-07-28 15:42:57	58.56575278	-136.0571139	229	Abundance	0	0	0	0	Good	LFT	2017-08-31	SO-2017.1	0
SO_C_20170728_A_1826.JPG	2017-07-28 15:42:58	58.56576667	-136.0562833	229	Abundance	0	0	0	0	Good	LFT	2017-08-31	SO-2017.1	0
SO_C_20170728_A_1827.JPG	2017-07-28 15:42:58	58.56576667	-136.0562833	229	Abundance	0	0	0	0	Good	LFT	2017-08-31	SO-2017.1	2
SO_C_20170728_A_1828.JPG	2017-07-28 15:42:59	58.56577778	-136.05545	229	Abundance	0	0	0	0	Good	LFT	2017-08-31	SO-2017.1	0
SO_C_20170728_A_1829.JPG	2017-07-28 15:43:00	58.56579167	-136.0546139	229	Abundance	0	0	0	0	Good	LFT	2017-08-31	SO-2017.1	0
SO_C_20170728_A_1830.JPG	2017-07-28 15:43:01	58.56580278	-136.053775	229	Abundance	0	0	0	0	Good	LFT	2017-08-31	SO-2017.1	0
SO_C_20170728_A_1831.JPG	2017-07-28 15:43:02	58.56581944	-136.0529389	229	Abundance	0	0	0	0	Good	LFT	2017-08-31	SO-2017.1	0
SO_C_20170728_A_1832.JPG	2017-07-28 15:43:03	58.56583611	-136.0521028	229	Abundance	0	0	0	0	Good	LFT	2017-08-31	SO-2017.1	0
SO_C_20170728_A_1833.JPG	2017-07-28 15:43:04	58.56585278	-136.0512667	229	Abundance	0	0	0	0	Good	LFT	2017-08-31	SO-2017.1	0
SO_C_20170728_A_1836.JPG	2017-07-28 15:43:07	58.56590833	-136.0487639	231	Abundance	0	0	0	0	Good	LFT	2017-08-31	SO-2017.1	0
SO_C_20170728_A_1837.JPG	2017-07-28 15:43:08	58.56592778	-136.0479333	232	Abundance	0	0	0	0	Good	LFT	2017-08-31	SO-2017.1	0
SO_C_20170728_A_1838.JPG	2017-07-28 15:43:09	58.56595	-136.0471028	232	Abundance	0	0	0	0	Good	LFT	2017-08-31	SO-2017.1	0
SO_C_20170728_A_1839.JPG	2017-07-28 15:43:10	58.56596667	-136.046275	233	Abundance	0	0	1	0	Good	LFT	2017-08-31	SO-2017.1	0
SO_C_20170728_A_1840.JPG	2017-07-28 15:43:11	58.56598611	-136.0454472	233	Abundance	0	0	0	0	Good	LFT	2017-08-31	SO-2017.1	0
SO_C_20170728_A_1841.JPG	2017-07-28 15:43:12	58.56600278	-136.0446194	234	Abundance	0	0	0	0	Good	LFT	2017-08-31	SO-2017.1	0
SO_C_20170728_A_1842.JPG	2017-07-28 15:43:13	58.56602222	-136.0437917	235	Abundance	0	0	0	0	Good	LFT	2017-08-31	SO-2017.1	0
SO_C_20170728_A_1843.JPG	2017-07-28 15:43:14	58.56604167	-136.0429667	235	Abundance	0	0	0	0	Good	LFT	2017-08-31	SO-2017.1	0
SO_C_20170728_A_1844.JPG	2017-07-28 15:43:15	58.56606111	-136.0421417	235	Abundance	0	0	1	0	Good	LFT	2017-08-31	SO-2017.1	0
SO_C_20170728_A_1845.JPG	2017-07-28 15:43:16	58.56608056	-136.0413167	236	Abundance	0	0	1	0	Good	LFT	2017-08-31	SO-2017.1	0
SO_C_20170728_A_1846.JPG	2017-07-28 15:43:17	58.5661	-136.0404917	236	Abundance	0	0	0	0	Good	LFT	2017-08-31	SO-2017.1	0
SO_C_20170728_A_1847.JPG	2017-07-28 15:43:18	58.56611667	-136.0396667	236	Abundance	0	0	0	0	Good	LFT	2017-08-31	SO-2017.1	0
SO_C_20170728_A_1848.JPG	2017-07-28 15:43:19	58.56613333	-136.0388444	236	Abundance	0	0	0	0	Good	LFT	2017-08-31	SO-2017.1	0
SO_C_20170728_A_1849.JPG	2017-07-28 15:43:20	58.56615	-136.0380222	236	Abundance	0	0	0	0	Good	LFT	2017-08-31	SO-2017.1	0
SO_C_20170728_A_1850.JPG	2017-07-28 15:43:21	58.56616944	-136.0372	237	Abundance	0	0	0	0	Good	LFT	2017-08-31	SO-2017.1	0
SO_C_20170728_A_1851.JPG	2017-07-28 15:43:22	58.56618889	-136.0363778	237	Abundance	0	0	0	0	Good	LFT	2017-08-31	SO-2017.1	0
SO_C_20170728_A_1852.JPG	2017-07-28 15:43:23	58.56620556	-136.0355556	237	Abundance	0	0	0	0	Good	LFT	2017-08-31	SO-2017.1	0
SO_C_20170728_A_1853.JPG	2017-07-28 15:43:24	58.566225	-136.0347361	238	Abundance	0	0	0	0	Good	LFT	2017-08-31	SO-2017.1	0
SO_C_20170728_A_1854.JPG	2017-07-28 15:43:25	58.56624167	-136.0339139	238	Abundance	0	0	0	0	Good	LFT	2017-08-31	SO-2017.1	0
SO_C_20170728_A_1855.JPG	2017-07-28 15:43:26	58.56626111	-136.0330917	239	Abundance	0	0	0	0	Good	LFT	2017-08-31	SO-2017.1	0
SO_C_20170728_A_1856.JPG	2017-07-28 15:43:27	58.56627778	-136.0322667	238	Abundance	0	0	0	0	Good	LFT	2017-08-31	SO-2017.1	0
SO_C_20170728_A_1857.JPG	2017-07-28 15:43:28	58.56629167	-136.0314417	238	Abundance	0	0	0	0	Good	LFT	2017-08-31	SO-2017.1	0
SO_C_20170728_A_1858.JPG	2017-07-28 15:43:29	58.56630278	-136.0306139	238	Abundance	0	0	0	0	Good	LFT	2017-08-31	SO-2017.1	0
SO_C_20170728_A_1859.JPG	2017-07-28 15:43:30	58.56630833	-136.0297833	237	Abundance	0	0	0	0	Good	LFT	2017-08-31	SO-2017.1	0
SO_C_20170728_A_1860.JPG	2017-07-28 15:43:31	58.56630833	-136.0289528	237	Abundance	0	0	0	0	Good	LFT	2017-08-31	SO-2017.1	0
SO_C_20170728_A_1861.JPG	2017-07-28 15:43:32	58.56630278	-136.0281194	237	Abundance	0	0	0	0	Good	LFT	2017-08-31	SO-2017.1	0
SO_C_20170728_A_1862.JPG	2017-07-28 15:43:33	58.56629444	-136.0272833	236	Abundance	0	0	0	0	Good	LFT	2017-08-31	SO-2017.1	0
SO_C_20170728_A_1863.JPG	2017-07-28 15:43:34	58.56627778	-136.0264444	236	Abundance	0	0	0	0	Good	LFT	2017-08-31	SO-2017.1	0
SO_C_20170728_A_1864.JPG	2017-07-28 15:43:35	58.56626111	-136.0256028	236	Abundance	0	0	0	0	Good	LFT	2017-08-31	SO-2017.1	0
SO_C_20170728_A_1865.JPG	2017-07-28 15:43:36	58.56624167	-136.0247611	235	Abundance	0	0	0	0	Good	LFT	2017-08-31	SO-2017.1	0
SO_C_20170728_A_1866.JPG	2017-07-28 15:43:37	58.56622222	-136.0239139	234	Abundance	0	0	0	0	Good	LFT	2017-08-31	SO-2017.1	0
SO_C_20170728_A_1867.JPG	2017-07-28 15:43:38	58.5662	-136.0230667	233	Abundance	0	0	0	0	Good	LFT	2017-08-31	SO-2017.1	0
SO_C_20170728_A_1868.JPG	2017-07-28 15:43:39	58.56618056	-136.0222167	233	Abundance	0	0	0	0	Good	LFT	2017-08-31	SO-2017.1	0
SO_C_20170728_A_1869.JPG	2017-07-28 15:43:40	58.56616111	-136.0213639	233	Abundance	0	0	0	0	Good	LFT	2017-08-31	SO-2017.1	0
SO_C_20170728_A_1870.JPG	2017-07-28 15:43:41	58.56614444	-136.0205111	232	Abundance	0	0	0	0	Good	LFT	2017-08-31	SO-2017.1	0
SO_C_20170728_A_1871.JPG	2017-07-28 15:43:42	58.56612778	-136.0196583	232	Abundance	0	0	0	0	Good	LFT	2017-08-31	SO-2017.1	0
SO_C_20170728_A_1872.JPG	2017-07-28 15:43:43	58.56611389	-136.0188028	231	Abundance	0	0	1	0	Good	LFT	2017-08-31	SO-2017.1	0
SO_C_20170728_A_1873.JPG	2017-07-28 15:43:44	58.56610278	-136.0179444	231	Abundance	0	0	0	0	Good	LFT	2017-08-31	SO-2017.1	0
SO_C_20170728_A_1874.JPG	2017-07-28 15:43:45	58.56609444	-136.0170861	230	Abundance	0	0	0	0	Good	LFT	2017-08-31	SO-2017.1	0
SO_C_20170728_A_1875.JPG	2017-07-28 15:43:46	58.56609167	-136.016225	230	Abundance	0	0	1	0	Good	LFT	2017-08-31	SO-2017.1	0
SO_C_20170728_A_1876.JPG	2017-07-28 15:43:47	58.56608889	-136.0153611	229	Abundance	0	0	1	0	Good	LFT	2017-08-31	SO-2017.1	0
SO_C_20170728_A_1877.JPG	2017-07-28 15:43:48	58.56608333	-136.0144944	228	Abundance	0	0	1	0	Good	LFT	2017-08-31	SO-2017.1	0
SO_C_20170728_A_1878.JPG	2017-07-28 15:43:49	58.56608056	-136.0136278	227	Abundance	0	0	0	0	Good	LFT	2017-08-31	SO-2017.1	0
SO_C_20170728_A_1879.JPG	2017-07-28 15:43:50	58.56607778	-136.0127611	227	Abundance	0	0	0	0	Good	LFT	2017-08-31	SO-2017.1	0
SO_C_20170728_A_1880.JPG	2017-07-28 15:43:51	58.56607778	-136.0118917	226	Abundance	0	0	0	0	Good	LFT	2017-08-31	SO-2017.1	0
SO_C_20170728_A_1881.JPG	2017-07-28 15:43:52	58.56608056	-136.0110222	227	Abundance	0	0	0	0	Good	LFT	2017-08-31	SO-2017.1	0
SO_C_20170728_A_1882.JPG	2017-07-28 15:43:53	58.56608889	-136.0101556	227	Abundance	0	0	0	0	Good	LFT	2017-08-31	SO-2017.1	0
SO_C_20170728_A_1883.JPG	2017-07-28 15:43:54	58.56610278	-136.0092917	227	Abundance	0	0	0	0	Good	LFT	2017-08-31	SO-2017.1	0
SO_C_20170728_A_1884.JPG	2017-07-28 15:43:55	58.56611944	-136.0084306	227	Abundance	0	0	0	0	Good	LFT	2017-08-31	SO-2017.1	0
SO_C_20170728_A_1885.JPG	2017-07-28 15:43:56	58.56613889	-136.007575	228	Abundance	0	0	0	0	Good	LFT	2017-08-31	SO-2017.1	0
SO_C_20170728_A_1886.JPG	2017-07-28 15:43:57	58.56616111	-136.0067194	229	Abundance	0	0	0	0	Good	LFT	2017-08-31	SO-2017.1	0
SO_C_20170728_A_1887.JPG	2017-07-28 15:43:58	58.56618889	-136.0058667	229	Abundance	0	0	0	0	Good	LFT	2017-08-31	SO-2017.1	0
SO_C_20170728_A_1888.JPG	2017-07-28 15:43:59	58.56621389	-136.0050194	230	Abundance	0	0	0	0	Good	LFT	2017-08-31	SO-2017.1	0
SO_C_20170728_A_1889.JPG	2017-07-28 15:44:00	58.56624167	-136.0041722	231	Abundance	0	0	1	0	Good	LFT	2017-08-31	SO-2017.1	0
SO_C_20170728_A_1890.JPG	2017-07-28 15:44:01	58.56626667	-136.0033278	232	Abundance	0	0	0	0	Good	LFT	2017-08-31	SO-2017.1	0
SO_C_20170728_A_1891.JPG	2017-07-28 15:44:02	58.56629167	-136.0024833	233	Abundance	0	0	0	0	Good	LFT	2017-08-31	SO-2017.1	0
SO_C_20170728_A_1892.JPG	2017-07-28 15:44:03	58.56631667	-136.0016417	234	Abundance	0	0	1	0	Good	LFT	2017-08-31	SO-2017.1	0
SO_C_20170728_A_1893.JPG	2017-07-28 15:44:04	58.56633889	-136.0008028	234	Abundance	0	0	1	0	Good	LFT	2017-08-31	SO-2017.1	0
SO_C_20170728_A_1894.JPG	2017-07-28 15:44:05	58.56635833	-135.9999611	235	Abundance	0	0	0	0	Good	LFT	2017-08-31	SO-2017.1	0
SO_C_20170728_A_1895.JPG	2017-07-28 15:44:06	58.56637222	-135.9991222	235	Abundance	0	0	0	0	Good	LFT	2017-08-31	SO-2017.1	0
SO_C_20170728_A_1896.JPG	2017-07-28 15:44:07	58.56638333	-135.9982833	235	Abundance	0	0	0	0	Good	LFT	2017-08-31	SO-2017.1	0
SO_C_20170728_A_1897.JPG	2017-07-28 15:44:08	58.56638889	-135.9974444	235	Abundance	0	0	1	0	Good	LFT	2017-08-31	SO-2017.1	0
SO_C_20170728_A_1898.JPG	2017-07-28 15:44:09	58.56639167	-135.9966056	235	Abundance	0	0	0	0	Good	LFT	2017-08-31	SO-2017.1	0
SO_C_20170728_A_1899.JPG	2017-07-28 15:44:10	58.56639444	-135.9957667	235	Abundance	0	0	0	0	Good	LFT	2017-08-31	SO-2017.1	0
SO_C_20170728_A_1900.JPG	2017-07-28 15:44:11	58.56639444	-135.9949278	235	Abundance	0	0	0	0	Good	LFT	2017-08-31	SO-2017.1	0
SO_C_20170728_A_1901.JPG	2017-07-28 15:44:12	58.56639444	-135.9940861	235	Abundance	0	0	1	0	Good	LFT	2017-08-31	SO-2017.1	0
SO_C_20170728_A_1902.JPG	2017-07-28 15:44:13	58.56639722	-135.9932472	235	Abundance	0	0	0	0	Good	LFT	2017-08-31	SO-2017.1	0
SO_C_20170728_A_1903.JPG	2017-07-28 15:46:17	58.58431389	-135.9439667	231	Abundance	0	0	0	1	Good	LFT	2017-08-31	SO-2017.1	0
SO_C_20170728_A_1904.JPG	2017-07-28 15:46:18	58.58433889	-135.9447306	231	Abundance	0	0	0	1	Good	LFT	2017-08-31	SO-2017.1	0
SO_C_20170728_A_1905.JPG	2017-07-28 15:46:19	58.58435278	-135.9455028	231	Abundance	0	0	0	1	Good	LFT	2017-08-31	SO-2017.1	0
SO_C_20170728_A_1906.JPG	2017-07-28 15:46:20	58.58435556	-135.946275	231	Abundance	0	0	0	1	Good	LFT	2017-08-31	SO-2017.1	0
SO_C_20170728_A_1907.JPG	2017-07-28 15:46:21	58.58434722	-135.9470528	230	Abundance	0	0	0	1	Good	LFT	2017-08-31	SO-2017.1	0
SO_C_20170728_A_1908.JPG	2017-07-28 15:46:22	58.584325	-135.9478333	230	Abundance	0	0	0	1	Good	LFT	2017-08-31	SO-2017.1	0
SO_C_20170728_A_1909.JPG	2017-07-28 15:46:23	58.58429167	-135.9486167	230	Abundance	0	0	0	1	Good	LFT	2017-08-31	SO-2017.1	0
SO_C_20170728_A_1910.JPG	2017-07-28 15:46:24	58.58425278	-135.9494028	229	Abundance	0	0	0	1	Good	LFT	2017-08-31	SO-2017.1	0
SO_C_20170728_A_1911.JPG	2017-07-28 15:46:25	58.58421389	-135.9501917	229	Abundance	0	0	0	1	Good	LFT	2017-08-31	SO-2017.1	0
SO_C_20170728_A_1912.JPG	2017-07-28 15:46:26	58.584175	-135.9509861	229	Abundance	0	0	0	1	Good	LFT	2017-08-31	SO-2017.1	0
SO_C_20170728_A_1913.JPG	2017-07-28 15:46:27	58.58413889	-135.9517806	229	Abundance	0	0	1	1	Good	LFT	2017-08-31	SO-2017.1	0
SO_C_20170728_A_1914.JPG	2017-07-28 15:46:28	58.58410556	-135.9525778	229	Abundance	0	0	1	1	Good	LFT	2017-08-31	SO-2017.1	0
SO_C_20170728_A_1915.JPG	2017-07-28 15:46:29	58.58407778	-135.953375	229	Abundance	0	0	1	1	Good	LFT	2017-08-31	SO-2017.1	0
SO_C_20170728_A_1916.JPG	2017-07-28 15:46:30	58.58405556	-135.954175	229	Abundance	0	0	1	1	Good	LFT	2017-08-31	SO-2017.1	0
SO_C_20170728_A_1917.JPG	2017-07-28 15:46:31	58.58403889	-135.9549778	229	Abundance	0	0	1	1	Good	LFT	2017-08-31	SO-2017.1	0
SO_C_20170728_A_1918.JPG	2017-07-28 15:46:32	58.58402778	-135.9557833	229	Abundance	0	0	1	0	Good	LFT	2017-08-31	SO-2017.1	0
SO_C_20170728_A_1919.JPG	2017-07-28 15:46:33	58.58402222	-135.9565889	229	Abundance	0	0	1	0	Good	LFT	2017-08-31	SO-2017.1	0
SO_C_20170728_A_1920.JPG	2017-07-28 15:46:34	58.58401944	-135.9573944	229	Abundance	0	0	1	0	Good	LFT	2017-08-31	SO-2017.1	0
SO_C_20170728_A_1921.JPG	2017-07-28 15:46:35	58.58402222	-135.9582028	229	Abundance	0	0	1	0	Good	LFT	2017-08-31	SO-2017.1	0
SO_C_20170728_A_1922.JPG	2017-07-28 15:46:36	58.58402778	-135.9590111	229	Abundance	0	0	1	0	Good	LFT	2017-08-31	SO-2017.1	0
SO_C_20170728_A_1923.JPG	2017-07-28 15:46:37	58.58403889	-135.9598194	229	Abundance	0	0	1	0	Good	LFT	2017-08-31	SO-2017.1	0
SO_C_20170728_A_1924.JPG	2017-07-28 15:46:38	58.58405556	-135.9606278	230	Abundance	0	0	1	0	Good	LFT	2017-08-31	SO-2017.1	0
SO_C_20170728_A_1925.JPG	2017-07-28 15:46:39	58.58407778	-135.9614361	230	Abundance	0	0	1	0	Good	LFT	2017-08-31	SO-2017.1	0
SO_C_20170728_A_1926.JPG	2017-07-28 15:46:40	58.58410833	-135.9622417	230	Abundance	0	0	1	0	Good	LFT	2017-08-31	SO-2017.1	0
SO_C_20170728_A_1927.JPG	2017-07-28 15:46:41	58.58414444	-135.9630472	231	Abundance	0	0	1	0	Good	LFT	2017-08-31	SO-2017.1	0
SO_C_20170728_A_1928.JPG	2017-07-28 15:46:42	58.58418056	-135.9638528	231	Abundance	0	0	1	0	Good	LFT	2017-08-31	SO-2017.1	0
SO_C_20170728_A_1929.JPG	2017-07-28 15:46:43	58.58421667	-135.9646583	230	Abundance	0	0	1	0	Good	LFT	2017-08-31	SO-2017.1	0
SO_C_20170728_A_1930.JPG	2017-07-28 15:46:44	58.58425	-135.9654667	231	Abundance	0	0	0	0	Good	LFT	2017-08-31	SO-2017.1	0
SO_C_20170728_A_1931.JPG	2017-07-28 15:46:45	58.58428333	-135.966275	231	Abundance	0	0	1	0	Good	LFT	2017-08-31	SO-2017.1	0
SO_C_20170728_A_1932.JPG	2017-07-28 15:46:46	58.58431111	-135.9670833	231	Abundance	0	0	1	0	Good	LFT	2017-08-31	SO-2017.1	0
SO_C_20170728_A_1933.JPG	2017-07-28 15:46:47	58.58433611	-135.9678972	231	Abundance	0	0	1	0	Good	LFT	2017-08-31	SO-2017.1	0
SO_C_20170728_A_1934.JPG	2017-07-28 15:46:48	58.58435833	-135.9687111	231	Abundance	0	0	1	0	Good	LFT	2017-08-31	SO-2017.1	0
SO_C_20170728_A_1935.JPG	2017-07-28 15:46:49	58.584375	-135.9695306	230	Abundance	0	0	1	0	Good	LFT	2017-08-31	SO-2017.1	0
SO_C_20170728_A_1936.JPG	2017-07-28 15:46:50	58.58438611	-135.9703528	229	Abundance	0	0	1	0	Good	LFT	2017-08-31	SO-2017.1	0
SO_C_20170728_A_1937.JPG	2017-07-28 15:46:51	58.58439167	-135.9711806	229	Abundance	0	0	1	0	Good	LFT	2017-08-31	SO-2017.1	0
SO_C_20170728_A_1938.JPG	2017-07-28 15:46:52	58.58439444	-135.9720111	227	Abundance	0	0	1	0	Good	LFT	2017-08-31	SO-2017.1	0
SO_C_20170728_A_1939.JPG	2017-07-28 15:46:53	58.58439444	-135.9728472	227	Abundance	0	0	1	0	Good	LFT	2017-08-31	SO-2017.1	0
SO_C_20170728_A_1940.JPG	2017-07-28 15:46:54	58.58438889	-135.9736861	226	Abundance	0	0	1	0	Good	LFT	2017-08-31	SO-2017.1	0
SO_C_20170728_A_1941.JPG	2017-07-28 15:46:55	58.58438056	-135.9745278	225	Abundance	0	0	1	0	Good	LFT	2017-08-31	SO-2017.1	0
SO_C_20170728_A_1942.JPG	2017-07-28 15:46:56	58.58436667	-135.9753694	225	Abundance	0	0	1	0	Good	LFT	2017-08-31	SO-2017.1	0
SO_C_20170728_A_1943.JPG	2017-07-28 15:46:57	58.58434444	-135.9762111	225	Abundance	0	0	1	0	Good	LFT	2017-08-31	SO-2017.1	0
SO_C_20170728_A_1944.JPG	2017-07-28 15:46:58	58.58432222	-135.97705	226	Abundance	0	0	1	0	Good	LFT	2017-08-31	SO-2017.1	0
SO_C_20170728_A_1945.JPG	2017-07-28 15:46:59	58.58429722	-135.9778861	226	Abundance	0	0	1	0	Good	LFT	2017-08-31	SO-2017.1	0
SO_C_20170728_A_1946.JPG	2017-07-28 15:47:00	58.584275	-135.9787194	227	Abundance	0	0	1	1	Good	LFT	2017-08-31	SO-2017.1	0
SO_C_20170728_A_1947.JPG	2017-07-28 15:47:01	58.58425278	-135.9795472	228	Abundance	0	0	1	1	Good	LFT	2017-08-31	SO-2017.1	0
SO_C_20170728_A_1948.JPG	2017-07-28 15:47:02	58.58423056	-135.9803722	229	Abundance	0	0	0	1	Good	LFT	2017-08-31	SO-2017.1	0
SO_C_20170728_A_1949.JPG	2017-07-28 15:47:03	58.58421111	-135.9811917	230	Abundance	0	0	0	1	Good	LFT	2017-08-31	SO-2017.1	0
SO_C_20170728_A_1950.JPG	2017-07-28 15:47:04	58.58419167	-135.9820111	231	Abundance	0	0	1	1	Good	LFT	2017-08-31	SO-2017.1	0
SO_C_20170728_A_1951.JPG	2017-07-28 15:47:05	58.584175	-135.9828306	231	Abundance	0	0	1	1	Good	LFT	2017-08-31	SO-2017.1	0
SO_C_20170728_A_1952.JPG	2017-07-28 15:47:06	58.58415833	-135.9836528	232	Abundance	0	0	1	1	Good	LFT	2017-08-31	SO-2017.1	0
SO_C_20170728_A_1953.JPG	2017-07-28 15:47:07	58.58415	-135.984475	231	Abundance	0	0	1	1	Good	LFT	2017-08-31	SO-2017.1	0
SO_C_20170728_A_1954.JPG	2017-07-28 15:47:08	58.58414167	-135.9853	230	Abundance	0	0	1	1	Good	LFT	2017-08-31	SO-2017.1	0
SO_C_20170728_A_1955.JPG	2017-07-28 15:47:09	58.58413889	-135.9861278	229	Abundance	0	0	1	1	Good	LFT	2017-08-31	SO-2017.1	0
SO_C_20170728_A_1956.JPG	2017-07-28 15:47:10	58.58413889	-135.9869583	229	Abundance	0	0	1	1	Good	LFT	2017-08-31	SO-2017.1	0
SO_C_20170728_A_1957.JPG	2017-07-28 15:47:11	58.58414167	-135.9877917	228	Abundance	0	0	1	0	Good	LFT	2017-08-31	SO-2017.1	0
SO_C_20170728_A_1958.JPG	2017-07-28 15:47:12	58.58414722	-135.988625	227	Abundance	0	0	1	0	Good	LFT	2017-08-31	SO-2017.1	0
SO_C_20170728_A_1959.JPG	2017-07-28 15:47:13	58.58415278	-135.9894611	227	Abundance	0	0	1	0	Good	LFT	2017-08-31	SO-2017.1	0
SO_C_20170728_A_1960.JPG	2017-07-28 15:47:14	58.58415833	-135.9903	227	Abundance	0	0	1	0	Good	LFT	2017-08-31	SO-2017.1	0
SO_C_20170728_A_1961.JPG	2017-07-28 15:47:15	58.58416111	-135.9911417	226	Abundance	0	0	1	0	Good	LFT	2017-08-31	SO-2017.1	0
SO_C_20170728_A_1962.JPG	2017-07-28 15:47:16	58.58416667	-135.9919833	226	Abundance	0	0	1	0	Good	LFT	2017-08-31	SO-2017.1	0
SO_C_20170728_A_1967.JPG	2017-07-28 15:47:21	58.58417778	-135.9961917	227	Abundance	0	0	1	0	Good	LFT	2017-08-31	SO-2017.1	0
SO_C_20170728_A_1968.JPG	2017-07-28 15:47:22	58.58418056	-135.9970278	227	Abundance	0	0	0	0	Good	LFT	2017-08-31	SO-2017.1	0
SO_C_20170728_A_1969.JPG	2017-07-28 15:47:23	58.58418611	-135.9978639	227	Abundance	0	0	0	0	Good	LFT	2017-08-31	SO-2017.1	0
SO_C_20170728_A_1970.JPG	2017-07-28 15:47:24	58.58418889	-135.9986972	228	Abundance	0	0	0	0	Good	LFT	2017-08-31	SO-2017.1	0
SO_C_20170728_A_1971.JPG	2017-07-28 15:47:25	58.58419167	-135.999525	229	Abundance	0	0	0	0	Good	LFT	2017-08-31	SO-2017.1	0
SO_C_20170728_A_1972.JPG	2017-07-28 15:47:26	58.58419444	-136.0003528	230	Abundance	0	0	0	0	Good	LFT	2017-08-31	SO-2017.1	0
SO_C_20170728_A_1973.JPG	2017-07-28 15:47:27	58.5842	-136.001175	231	Abundance	0	0	0	0	Good	LFT	2017-08-31	SO-2017.1	0
SO_C_20170728_A_1974.JPG	2017-07-28 15:47:28	58.58420278	-136.0019972	231	Abundance	0	0	0	0	Good	LFT	2017-08-31	SO-2017.1	0
SO_C_20170728_A_1975.JPG	2017-07-28 15:47:29	58.58420833	-136.0028167	233	Abundance	0	0	0	0	Good	LFT	2017-08-31	SO-2017.1	0
SO_C_20170728_A_1976.JPG	2017-07-28 15:47:30	58.58421389	-136.0036333	234	Abundance	0	0	0	0	Good	LFT	2017-08-31	SO-2017.1	0
SO_C_20170728_A_1977.JPG	2017-07-28 15:47:31	58.58421944	-136.0044528	234	Abundance	0	0	0	0	Good	LFT	2017-08-31	SO-2017.1	0
SO_C_20170728_A_1978.JPG	2017-07-28 15:47:32	58.58422778	-136.0052722	234	Abundance	0	0	0	0	Good	LFT	2017-08-31	SO-2017.1	0
SO_C_20170728_A_1979.JPG	2017-07-28 15:47:33	58.58423611	-136.0060944	233	Abundance	0	0	0	0	Good	LFT	2017-08-31	SO-2017.1	0
SO_C_20170728_A_1980.JPG	2017-07-28 15:47:34	58.58424444	-136.0069194	233	Abundance	0	0	0	0	Good	LFT	2017-08-31	SO-2017.1	0
SO_C_20170728_A_1981.JPG	2017-07-28 15:47:35	58.58425	-136.0077472	232	Abundance	0	0	0	0	Good	LFT	2017-08-31	SO-2017.1	0
SO_C_20170728_A_1982.JPG	2017-07-28 15:47:36	58.58425556	-136.008575	231	Abundance	0	0	0	0	Good	LFT	2017-08-31	SO-2017.1	0
SO_C_20170728_A_1983.JPG	2017-07-28 15:47:37	58.58425833	-136.0094083	230	Abundance	0	0	0	0	Good	LFT	2017-08-31	SO-2017.1	0
SO_C_20170728_A_1984.JPG	2017-07-28 15:47:38	58.58425833	-136.0102417	230	Abundance	0	0	1	0	Good	LFT	2017-08-31	SO-2017.1	0
SO_C_20170728_A_1985.JPG	2017-07-28 15:47:39	58.58425278	-136.0110778	230	Abundance	0	0	0	0	Good	LFT	2017-08-31	SO-2017.1	0
SO_C_20170728_A_1986.JPG	2017-07-28 15:47:40	58.58424444	-136.0119139	229	Abundance	0	0	0	0	Good	LFT	2017-08-31	SO-2017.1	0
SO_C_20170728_A_1987.JPG	2017-07-28 15:47:41	58.58423333	-136.0127528	229	Abundance	0	0	0	0	Good	LFT	2017-08-31	SO-2017.1	0
SO_C_20170728_A_1988.JPG	2017-07-28 15:47:42	58.58421944	-136.0135889	229	Abundance	0	0	0	0	Good	LFT	2017-08-31	SO-2017.1	0
SO_C_20170728_A_1989.JPG	2017-07-28 15:47:43	58.5842	-136.0144278	229	Abundance	0	0	0	0	Good	LFT	2017-08-31	SO-2017.1	0
SO_C_20170728_A_1990.JPG	2017-07-28 15:47:44	58.58418056	-136.0152667	229	Abundance	0	0	0	0	Good	LFT	2017-08-31	SO-2017.1	0
SO_C_20170728_A_1991.JPG	2017-07-28 15:47:45	58.58416111	-136.0161028	230	Abundance	0	0	0	0	Good	LFT	2017-08-31	SO-2017.1	0
SO_C_20170728_A_1992.JPG	2017-07-28 15:47:46	58.58414167	-136.0169417	229	Abundance	0	0	0	0	Good	LFT	2017-08-31	SO-2017.1	0
SO_C_20170728_A_1993.JPG	2017-07-28 15:47:47	58.58412222	-136.0177778	230	Abundance	0	0	0	0	Good	LFT	2017-08-31	SO-2017.1	0
SO_C_20170728_A_1994.JPG	2017-07-28 15:47:48	58.58410556	-136.0186139	229	Abundance	0	0	0	0	Good	LFT	2017-08-31	SO-2017.1	0
SO_C_20170728_A_1995.JPG	2017-07-28 15:47:49	58.58408889	-136.01945	229	Abundance	0	0	0	0	Good	LFT	2017-08-31	SO-2017.1	0
SO_C_20170728_A_1996.JPG	2017-07-28 15:47:50	58.58407222	-136.0202861	230	Abundance	0	0	0	0	Good	LFT	2017-08-31	SO-2017.1	0
SO_C_20170728_A_1997.JPG	2017-07-28 15:47:51	58.58405556	-136.0211194	230	Abundance	0	0	0	0	Good	LFT	2017-08-31	SO-2017.1	0
SO_C_20170728_A_1998.JPG	2017-07-28 15:47:52	58.58403889	-136.0219556	230	Abundance	0	0	0	0	Good	LFT	2017-08-31	SO-2017.1	0
SO_C_20170728_A_1999.JPG	2017-07-28 15:47:53	58.584025	-136.0227889	230	Abundance	0	0	0	0	Good	LFT	2017-08-31	SO-2017.1	0
SO_C_20170728_A_2000.JPG	2017-07-28 15:47:54	58.58401111	-136.023625	231	Abundance	0	0	0	0	Good	LFT	2017-08-31	SO-2017.1	0
SO_C_20170728_A_2001.JPG	2017-07-28 15:47:55	58.584	-136.0244583	230	Abundance	0	0	0	0	Good	LFT	2017-08-31	SO-2017.1	0
SO_C_20170728_A_2002.JPG	2017-07-28 15:47:56	58.58398889	-136.0252917	230	Abundance	0	0	0	0	Good	LFT	2017-08-31	SO-2017.1	0
SO_C_20170728_A_2003.JPG	2017-07-28 15:47:57	58.58397778	-136.0261278	230	Abundance	0	0	1	0	Good	LFT	2017-08-31	SO-2017.1	0
SO_C_20170728_A_2004.JPG	2017-07-28 15:47:58	58.58396944	-136.0269611	230	Abundance	0	0	0	0	Good	LFT	2017-08-31	SO-2017.1	0
SO_C_20170728_A_2005.JPG	2017-07-28 15:47:59	58.58396111	-136.0277944	229	Abundance	0	0	1	0	Good	LFT	2017-08-31	SO-2017.1	0
SO_C_20170728_A_2006.JPG	2017-07-28 15:48:00	58.58395556	-136.0286278	230	Abundance	0	0	1	0	Good	LFT	2017-08-31	SO-2017.1	0
SO_C_20170728_A_2007.JPG	2017-07-28 15:48:01	58.58394722	-136.0294611	230	Abundance	0	0	0	0	Good	LFT	2017-08-31	SO-2017.1	0
SO_C_20170728_A_2008.JPG	2017-07-28 15:48:02	58.58393889	-136.0302944	230	Abundance	0	0	0	0	Good	LFT	2017-08-31	SO-2017.1	0
SO_C_20170728_A_2009.JPG	2017-07-28 15:48:03	58.58392778	-136.0311278	230	Abundance	0	0	0	0	Good	LFT	2017-08-31	SO-2017.1	0
SO_C_20170728_A_2010.JPG	2017-07-28 15:48:04	58.58391944	-136.0319611	230	Abundance	0	0	0	0	Good	LFT	2017-08-31	SO-2017.1	0
SO_C_20170728_A_2011.JPG	2017-07-28 15:48:05	58.58390833	-136.0327944	230	Abundance	0	0	0	0	Good	LFT	2017-08-31	SO-2017.1	0
SO_C_20170728_A_2012.JPG	2017-07-28 15:48:06	58.58389722	-136.033625	231	Abundance	0	0	0	0	Good	LFT	2017-08-31	SO-2017.1	0
SO_C_20170728_A_2013.JPG	2017-07-28 15:48:07	58.58389167	-136.0344556	231	Abundance	0	0	0	0	Good	LFT	2017-08-31	SO-2017.1	0
SO_C_20170728_A_2014.JPG	2017-07-28 15:48:08	58.58388333	-136.0352861	231	Abundance	0	0	0	0	Good	LFT	2017-08-31	SO-2017.1	0
SO_C_20170728_A_2015.JPG	2017-07-28 15:48:09	58.58388056	-136.0361194	231	Abundance	0	0	0	0	Good	LFT	2017-08-31	SO-2017.1	0
SO_C_20170728_A_2016.JPG	2017-07-28 15:48:10	58.583875	-136.03695	230	Abundance	0	0	0	0	Good	LFT	2017-08-31	SO-2017.1	0
SO_C_20170728_A_2017.JPG	2017-07-28 15:48:11	58.58386944	-136.0377833	230	Abundance	0	0	0	0	Good	LFT	2017-08-31	SO-2017.1	0
SO_C_20170728_A_2018.JPG	2017-07-28 15:48:12	58.58386389	-136.0386139	230	Abundance	0	0	0	0	Good	LFT	2017-08-31	SO-2017.1	0
SO_C_20170728_A_2019.JPG	2017-07-28 15:48:13	58.58385833	-136.0394472	229	Abundance	0	0	0	0	Good	LFT	2017-08-31	SO-2017.1	0
SO_C_20170728_A_2020.JPG	2017-07-28 15:48:14	58.58385	-136.0402806	229	Abundance	0	0	0	0	Good	LFT	2017-08-31	SO-2017.1	0
SO_C_20170728_A_2021.JPG	2017-07-28 15:48:15	58.58384167	-136.0411139	229	Abundance	0	0	0	0	Good	LFT	2017-08-31	SO-2017.1	0
SO_C_20170728_A_2022.JPG	2017-07-28 15:48:16	58.58383611	-136.0419444	228	Abundance	0	0	1	0	Good	LFT	2017-08-31	SO-2017.1	0
SO_C_20170728_A_2023.JPG	2017-07-28 15:48:17	58.58382778	-136.0427778	229	Abundance	0	0	0	0	Good	LFT	2017-08-31	SO-2017.1	0
SO_C_20170728_A_2024.JPG	2017-07-28 15:48:18	58.58381944	-136.0436083	229	Abundance	0	0	0	0	Good	LFT	2017-08-31	SO-2017.1	0
SO_C_20170728_A_2025.JPG	2017-07-28 15:48:19	58.58381111	-136.0444389	228	Abundance	0	0	0	0	Good	LFT	2017-08-31	SO-2017.1	0
SO_C_20170728_A_2026.JPG	2017-07-28 15:48:20	58.58380556	-136.0452694	228	Abundance	0	0	0	0	Good	LFT	2017-08-31	SO-2017.1	0
SO_C_20170728_A_2027.JPG	2017-07-28 15:48:21	58.58379722	-136.0461	228	Abundance	0	0	0	0	Good	LFT	2017-08-31	SO-2017.1	0
SO_C_20170728_A_2028.JPG	2017-07-28 15:48:22	58.58379167	-136.0469306	228	Abundance	0	0	0	0	Good	LFT	2017-08-31	SO-2017.1	0
SO_C_20170728_A_2029.JPG	2017-07-28 15:48:23	58.58378333	-136.0477611	228	Abundance	0	0	0	0	Good	LFT	2017-08-31	SO-2017.1	0
[truncated: 2,813 more rows]
